# Supplementary material for: Cryo-EM structure of single-layered nucleoprotein-RNA complex from Marburg virus
Source: Springer Nature journal article supplement (doi:10.1038/s41467-024-54431-7), 2024-11-27
Supplement: MOESM1 [file 41467_2024_54431_MOESM1_ESM.pdf]

# **Cryo-EM structure of single-layered nucleoprotein-RNA complex from Marburg virus**

Luca Zinzula <sup>1,2 \*</sup>, Florian Beck <sup>1,3</sup>, Marianna Camasta <sup>1</sup>, Stefan Bohn <sup>1,4</sup>, Chuan Liu <sup>1</sup>, Dustin Morado <sup>5,6</sup>, Andreas Bracher <sup>7</sup>, Jürgen M. Plitzko <sup>1,3</sup>, Wolfgang Baumeister <sup>1,2 \*</sup>

<sup>1</sup> Max Planck Institute of Biochemistry, Department of Molecular Structural Biology, 82152 Martinsried, Germany

<sup>2</sup> iHuman Institute, ShanghaiTech University, 201210 Shanghai, China.

<sup>3</sup> Max Planck Institute of Biochemistry, CryoEM Technology, 82152 Martinsried, Germany.

<sup>4</sup> Institute of Structural Biology, Helmholtz Center Munich, 85764 Oberschleissheim, Germany.

<sup>5</sup> Max Planck Institute of Biochemistry, Department of Cell and Virus Structure, 82152 Martinsried, Germany.

<sup>6</sup> Stockholm University, Department for Biochemistry and Biophysics, Science for Life Laboratory, 10691 Stockholm, Sweden.

<sup>7</sup> Max Planck Institute of Biochemistry, Department of Cellular Biochemistry, 82152 Martinsried, Germany.

\* corresponding authors: [zinzula@biochem.mpg.de](mailto:zinzula@biochem.mpg.de) ; [baumeist@biochem.mpg.de](mailto:baumeist@biochem.mpg.de)

## **Supplementary Information**



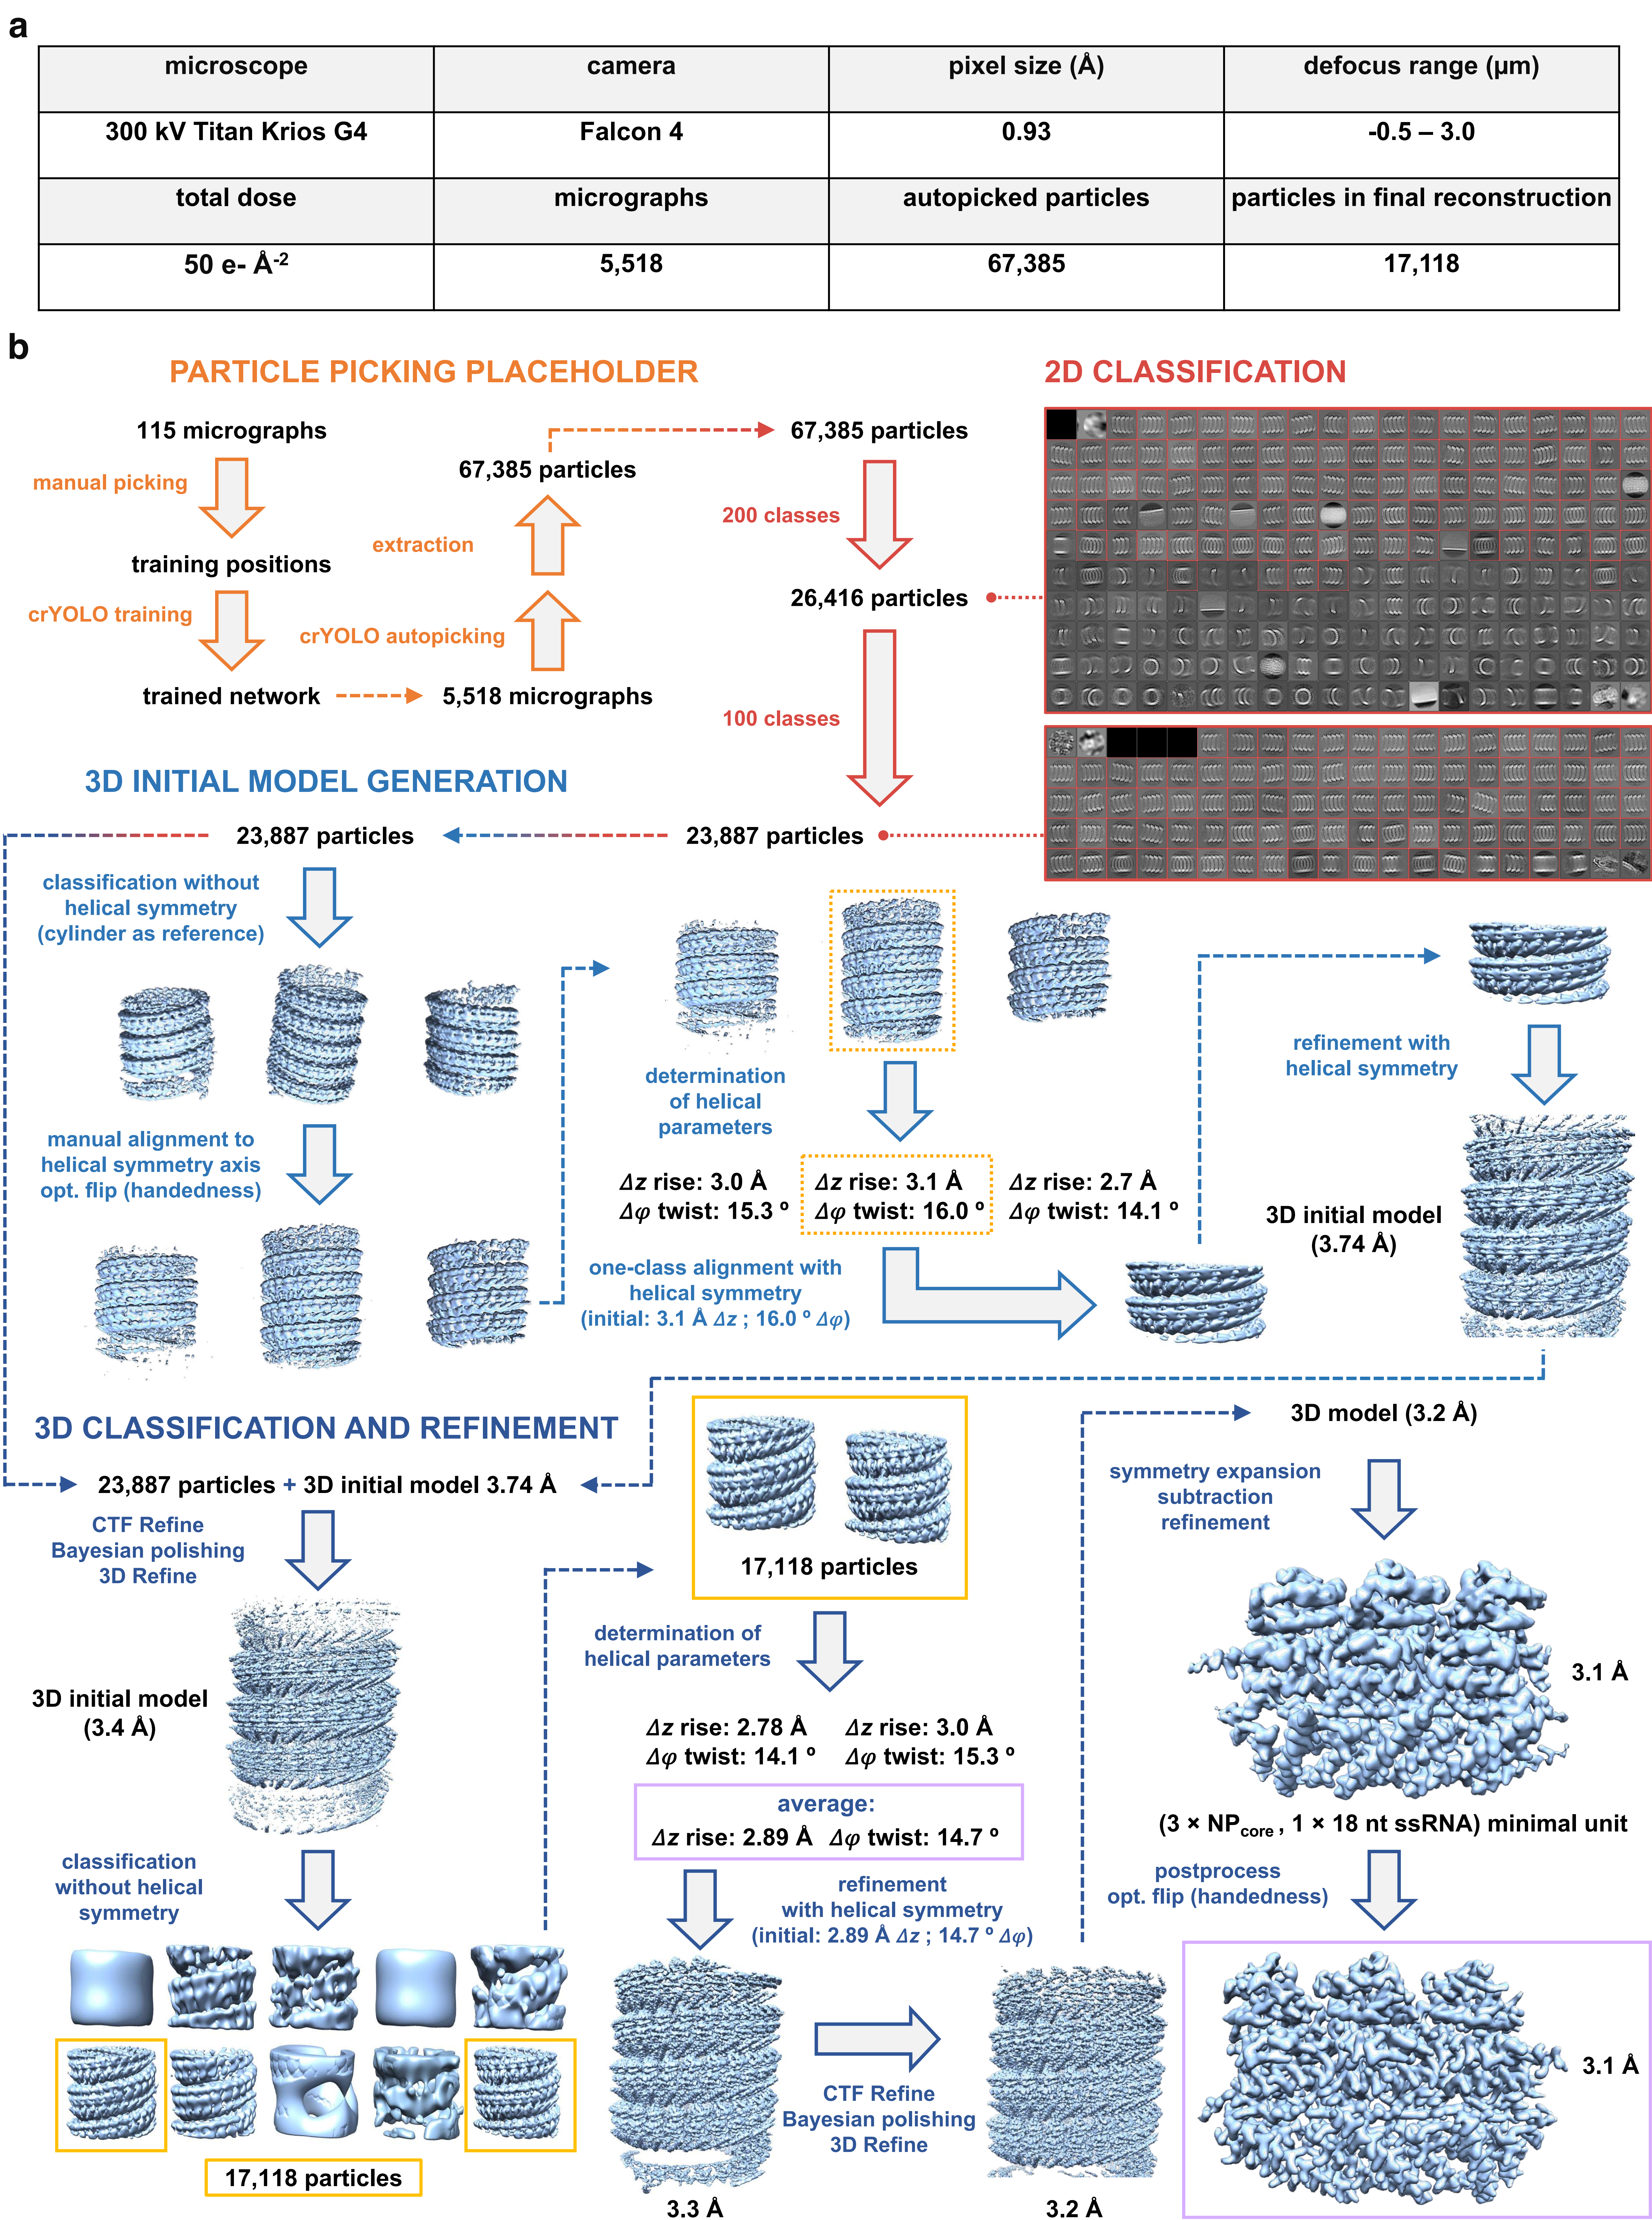

**Supplementary Fig. 1. Experimental workflow for structure determination of MARV RNP complex by helical reconstruction.** **a**, cryo-EM data collection parameters and dataset composition. **b**, flow chart of the SPA helical reconstruction pipeline for the structure determination of the *in vitro* reconstituted MARV RNP complex in single-layer conformation; 2D averages (with selected best classes highlighted by red squares) and cryo-EM density maps of the initial, 3D-class best selected and refined models (highlighted by yellow and violet squares, respectively) are shown.



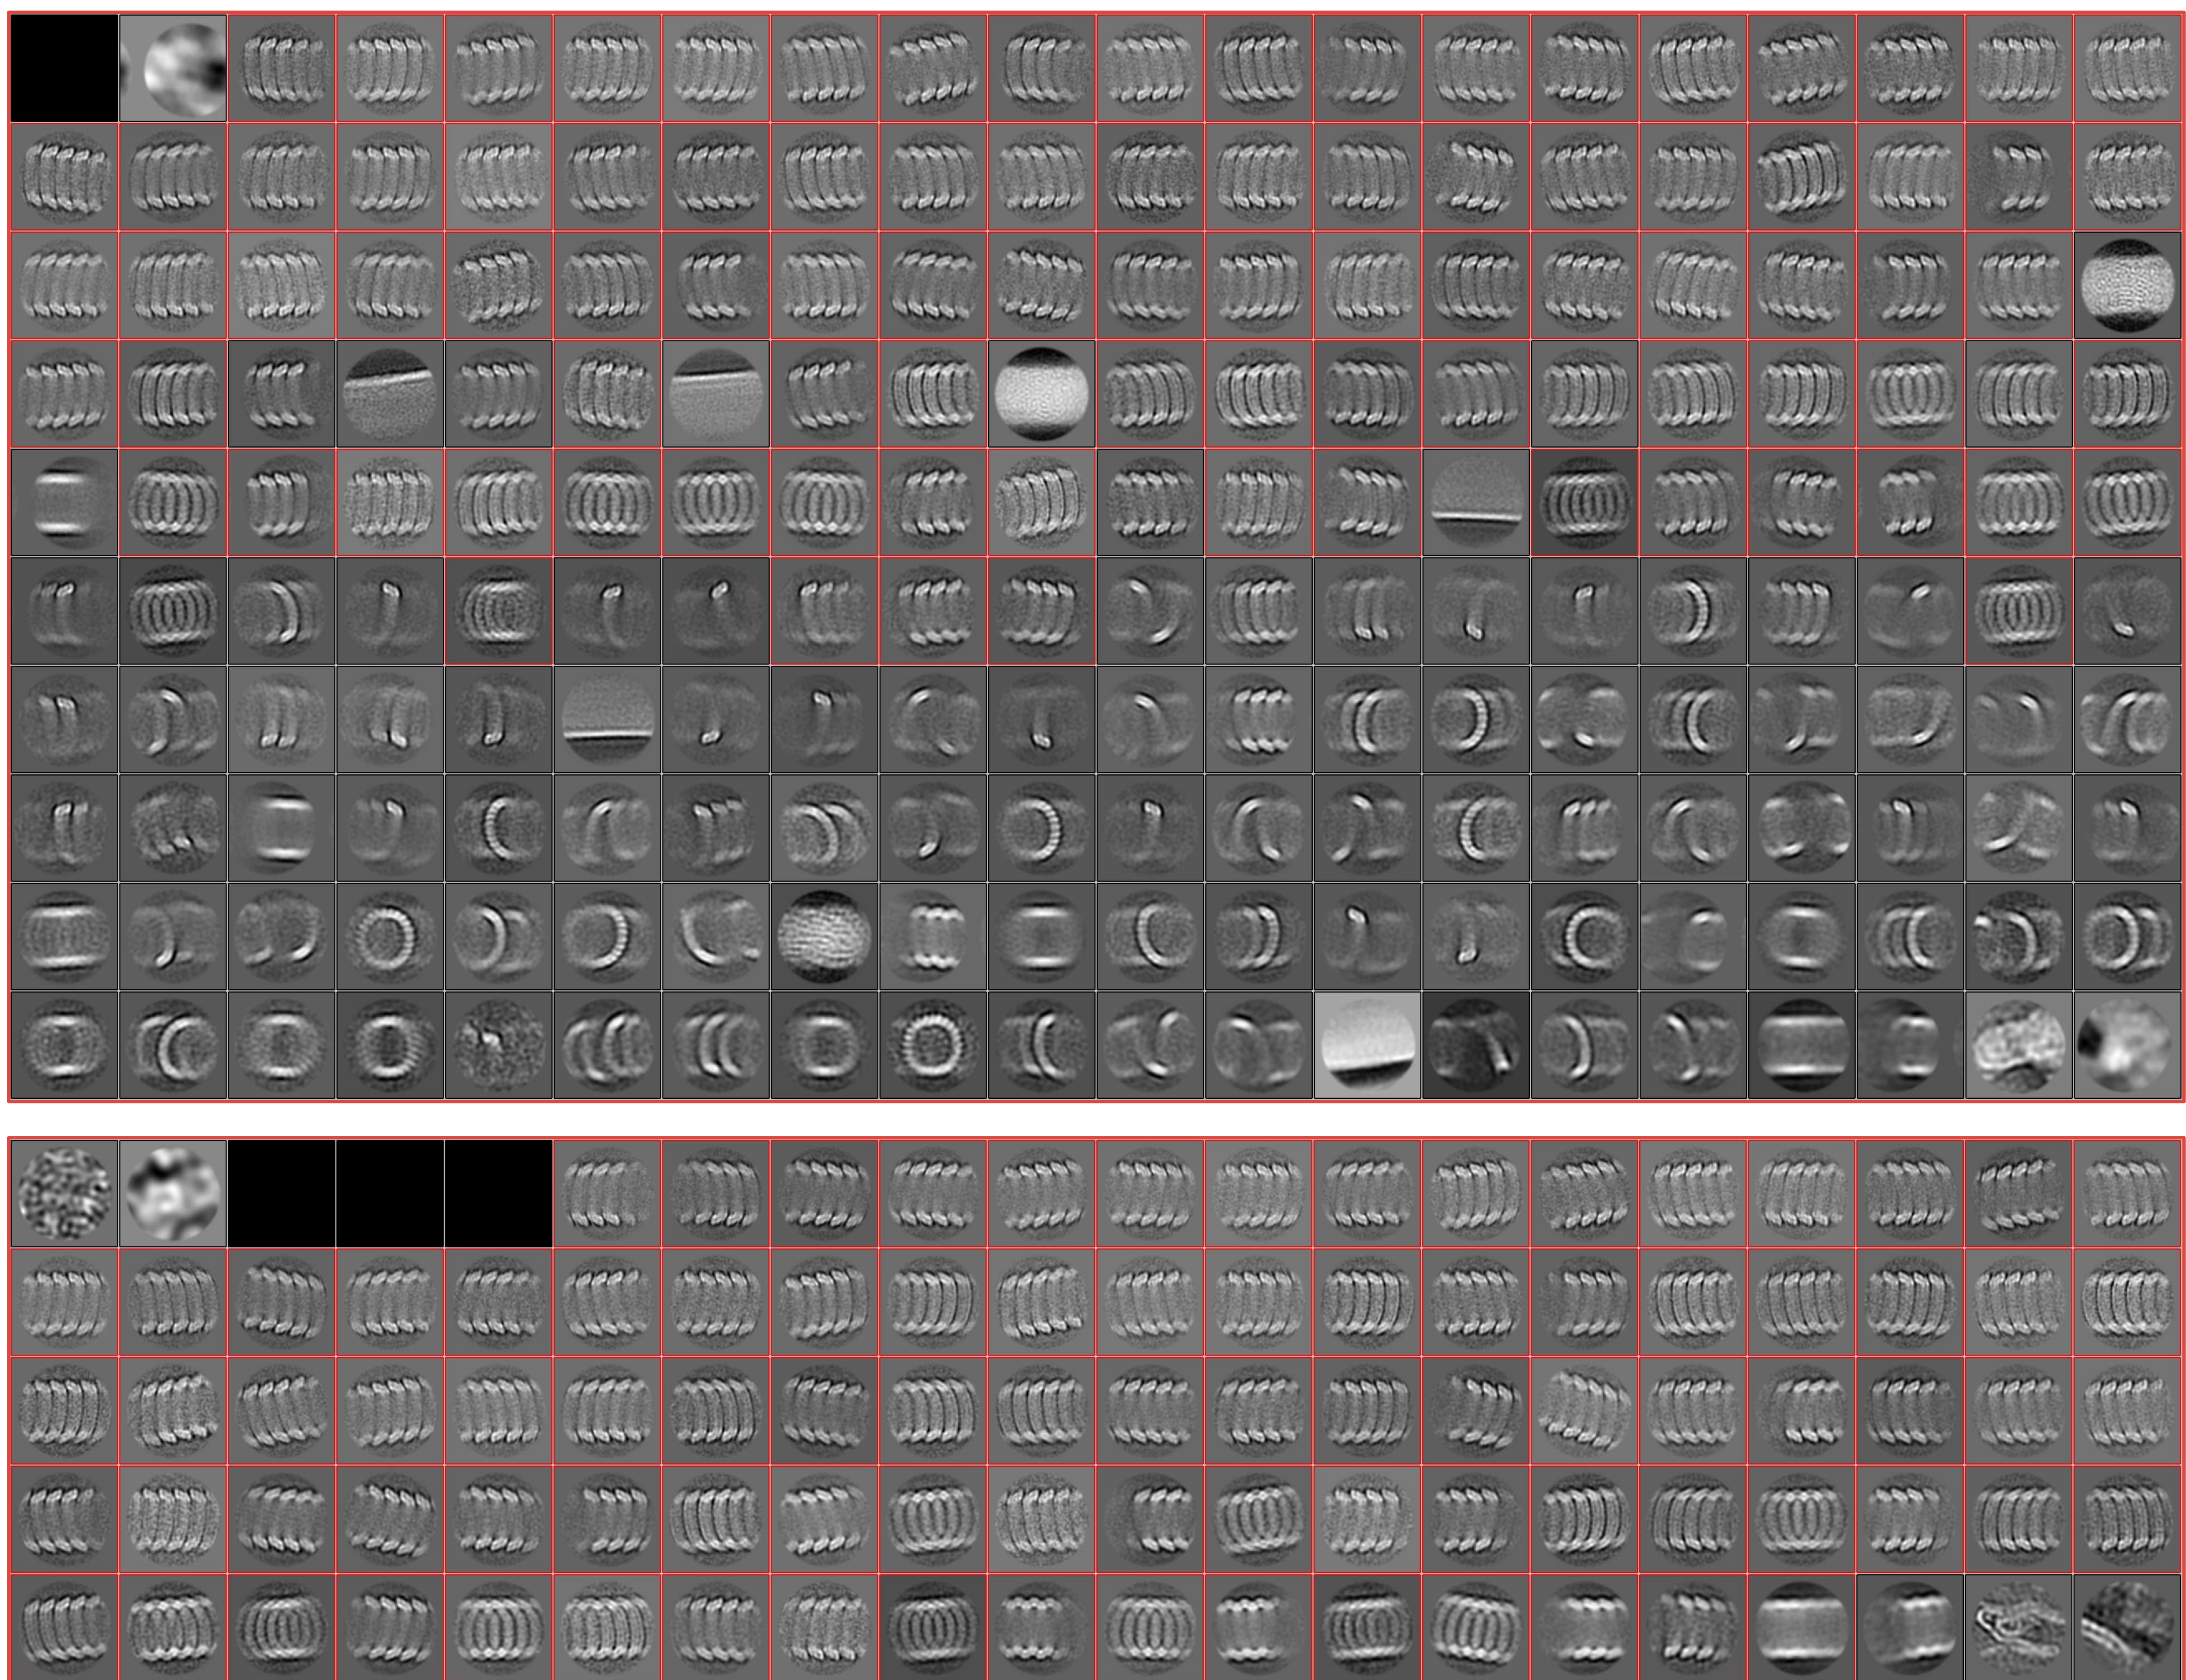

**Supplementary Fig. 2. 2D classification of *in vitro* reconstituted MARV RNP complex cryo-EM images for structure determination by helical reconstruction.** Zoomed view of the two rounds of 2D classification into 200 classes (first round, upper panel; starting dataset of 67,385 particles, final selected dataset 26,416 particles) and 100 classes (second round, lower panel; starting dataset 26,416 particles, final selected dataset 23,887 particles) shown in Supplementary Fig. 1, undertaken during the SPA workflow for the refinement of 2D class averages and the elimination of poorly aligned particles or contaminants; selected best classes at the end of each 2D classification step are highlighted by red squares.



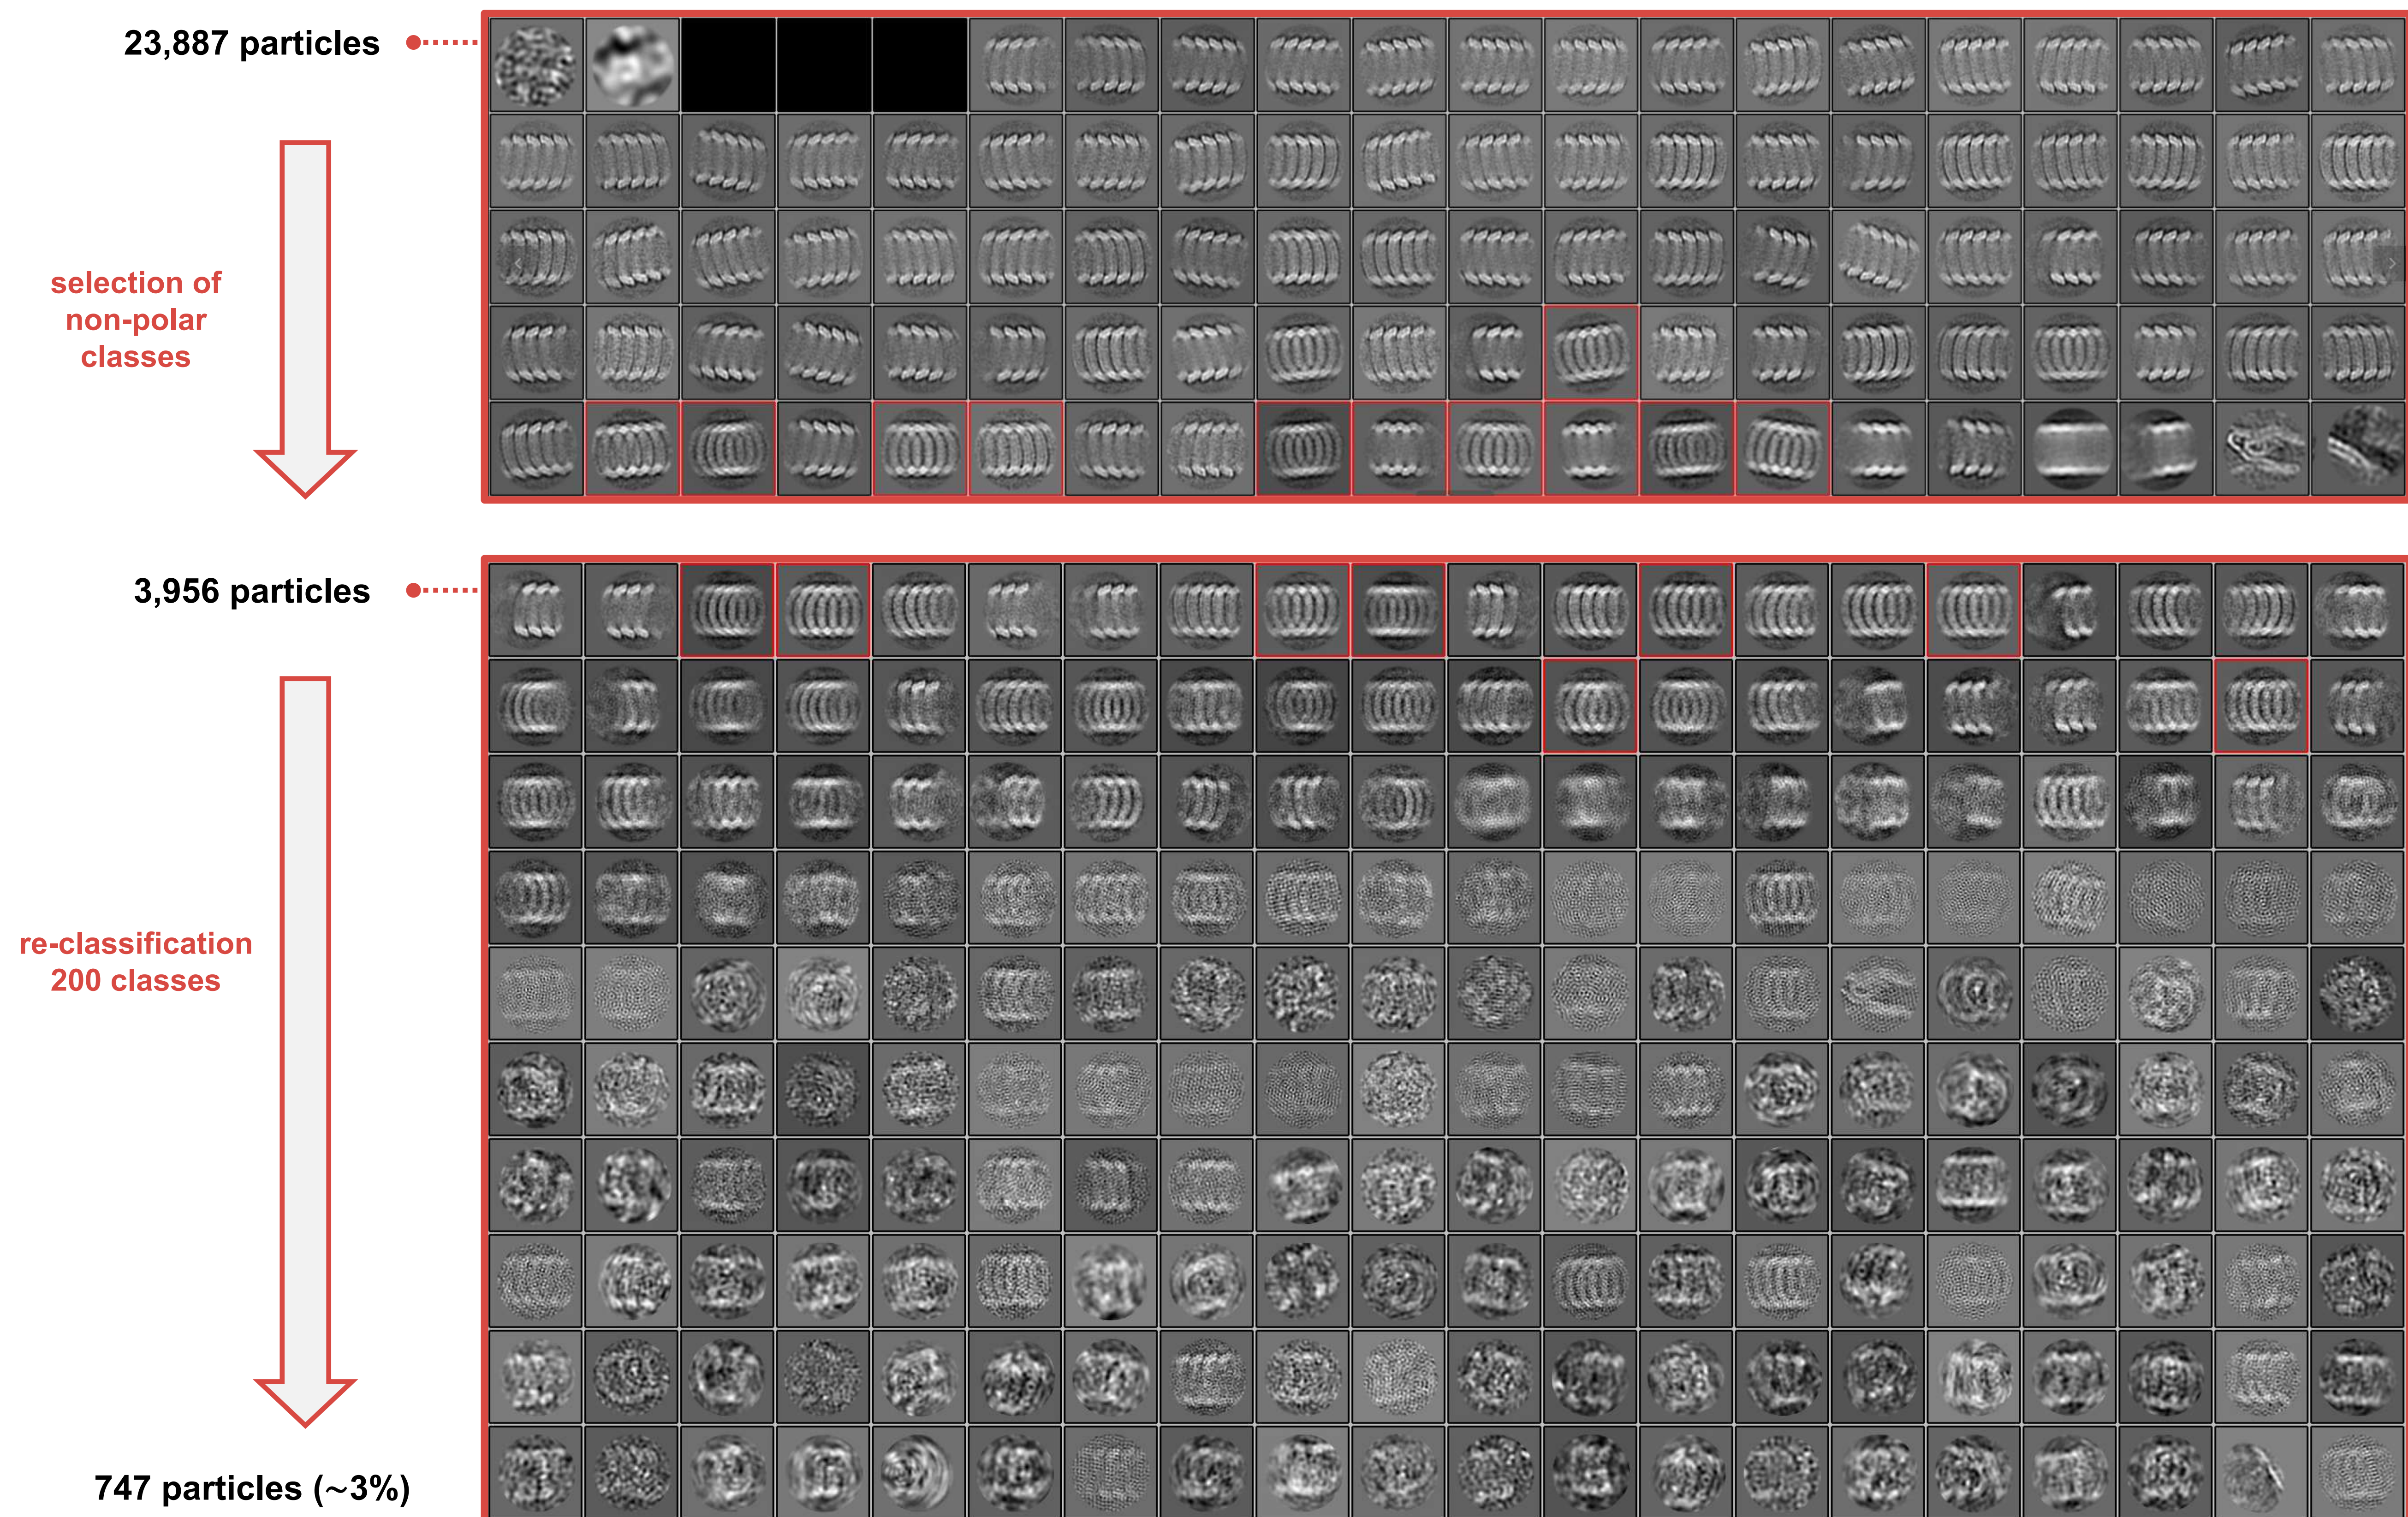

**Supplementary Fig. 3. Assessment of structural heterogeneity in the cryo-EM dataset of the *in vitro* reconstituted MARV RNP complex.** Selection of non-polar 2D class averages ( $n = 11$ ; 3,956 particles) from the pool of the last round of 2D classification (23,887 particles), and re-classification over 200 classes for the new selection of particles whose 2D classes do not have any polarity in their helical course and display structural heterogeneity ( $n = 747$ ; ~ 3 % of the dataset); selected best class averages at each step of 2D classification are highlighted by red squares.



**Supplementary Table 1. Cryo-EM data collection, refinement and validation statistics**

|                                                     | Marburg virus single-layered<br>nucleoprotein-RNA complex<br>(EMDB-50803)<br>(PDB 9FVD) |
|-----------------------------------------------------|-----------------------------------------------------------------------------------------|
| <b>Data collection and processing</b>               |                                                                                         |
| Magnification                                       | 130,000 ×                                                                               |
| Voltage (kV)                                        | 300                                                                                     |
| Electron exposure (e <sup>−</sup> /Å <sup>2</sup> ) | 40                                                                                      |
| Defocus range (μm)                                  | − 0.5 to − 3.0                                                                          |
| Pixel size (Å)                                      | 0.93                                                                                    |
| Symmetry imposed                                    | Helical                                                                                 |
| Initial particle images (no.)                       | 67,385                                                                                  |
| Final particle images (no.)                         | 17,118                                                                                  |
| Map resolution (Å)                                  | 3.2                                                                                     |
| FSC threshold                                       | 0.143                                                                                   |
| Map local resolution range (Å)                      | 3.0 to 3.6                                                                              |
| <b>Refinement</b>                                   |                                                                                         |
| Initial model used (PDB code)                       | 7F1M                                                                                    |
| Model resolution (Å)                                | 3.2                                                                                     |
| Map sharpening <i>B</i> factor (Å <sup>2</sup> )    | 88                                                                                      |
| Model composition                                   |                                                                                         |
| Non-hydrogen atoms                                  | 10,146                                                                                  |
| Protein residues                                    | 1,143                                                                                   |
| Nucleotide residues                                 | 54                                                                                      |
| <i>B</i> factors (Å <sup>2</sup> )                  |                                                                                         |
| Protein                                             | 115.06                                                                                  |
| Nucleotide                                          | 93.61                                                                                   |
| R.m.s. deviations                                   |                                                                                         |
| Bond lengths (Å)                                    | 0.004                                                                                   |
| Bond angles (°)                                     | 0.945                                                                                   |
| Validation                                          |                                                                                         |
| MolProbity score                                    | 1.83                                                                                    |
| Clashscore                                          | 16.91                                                                                   |
| Poor rotamers (%)                                   | 0                                                                                       |
| Ramachandran plot                                   |                                                                                         |
| Favored (%)                                         | 97.51                                                                                   |
| Allowed (%)                                         | 2.49                                                                                    |
| Disallowed (%)                                      | 0                                                                                       |



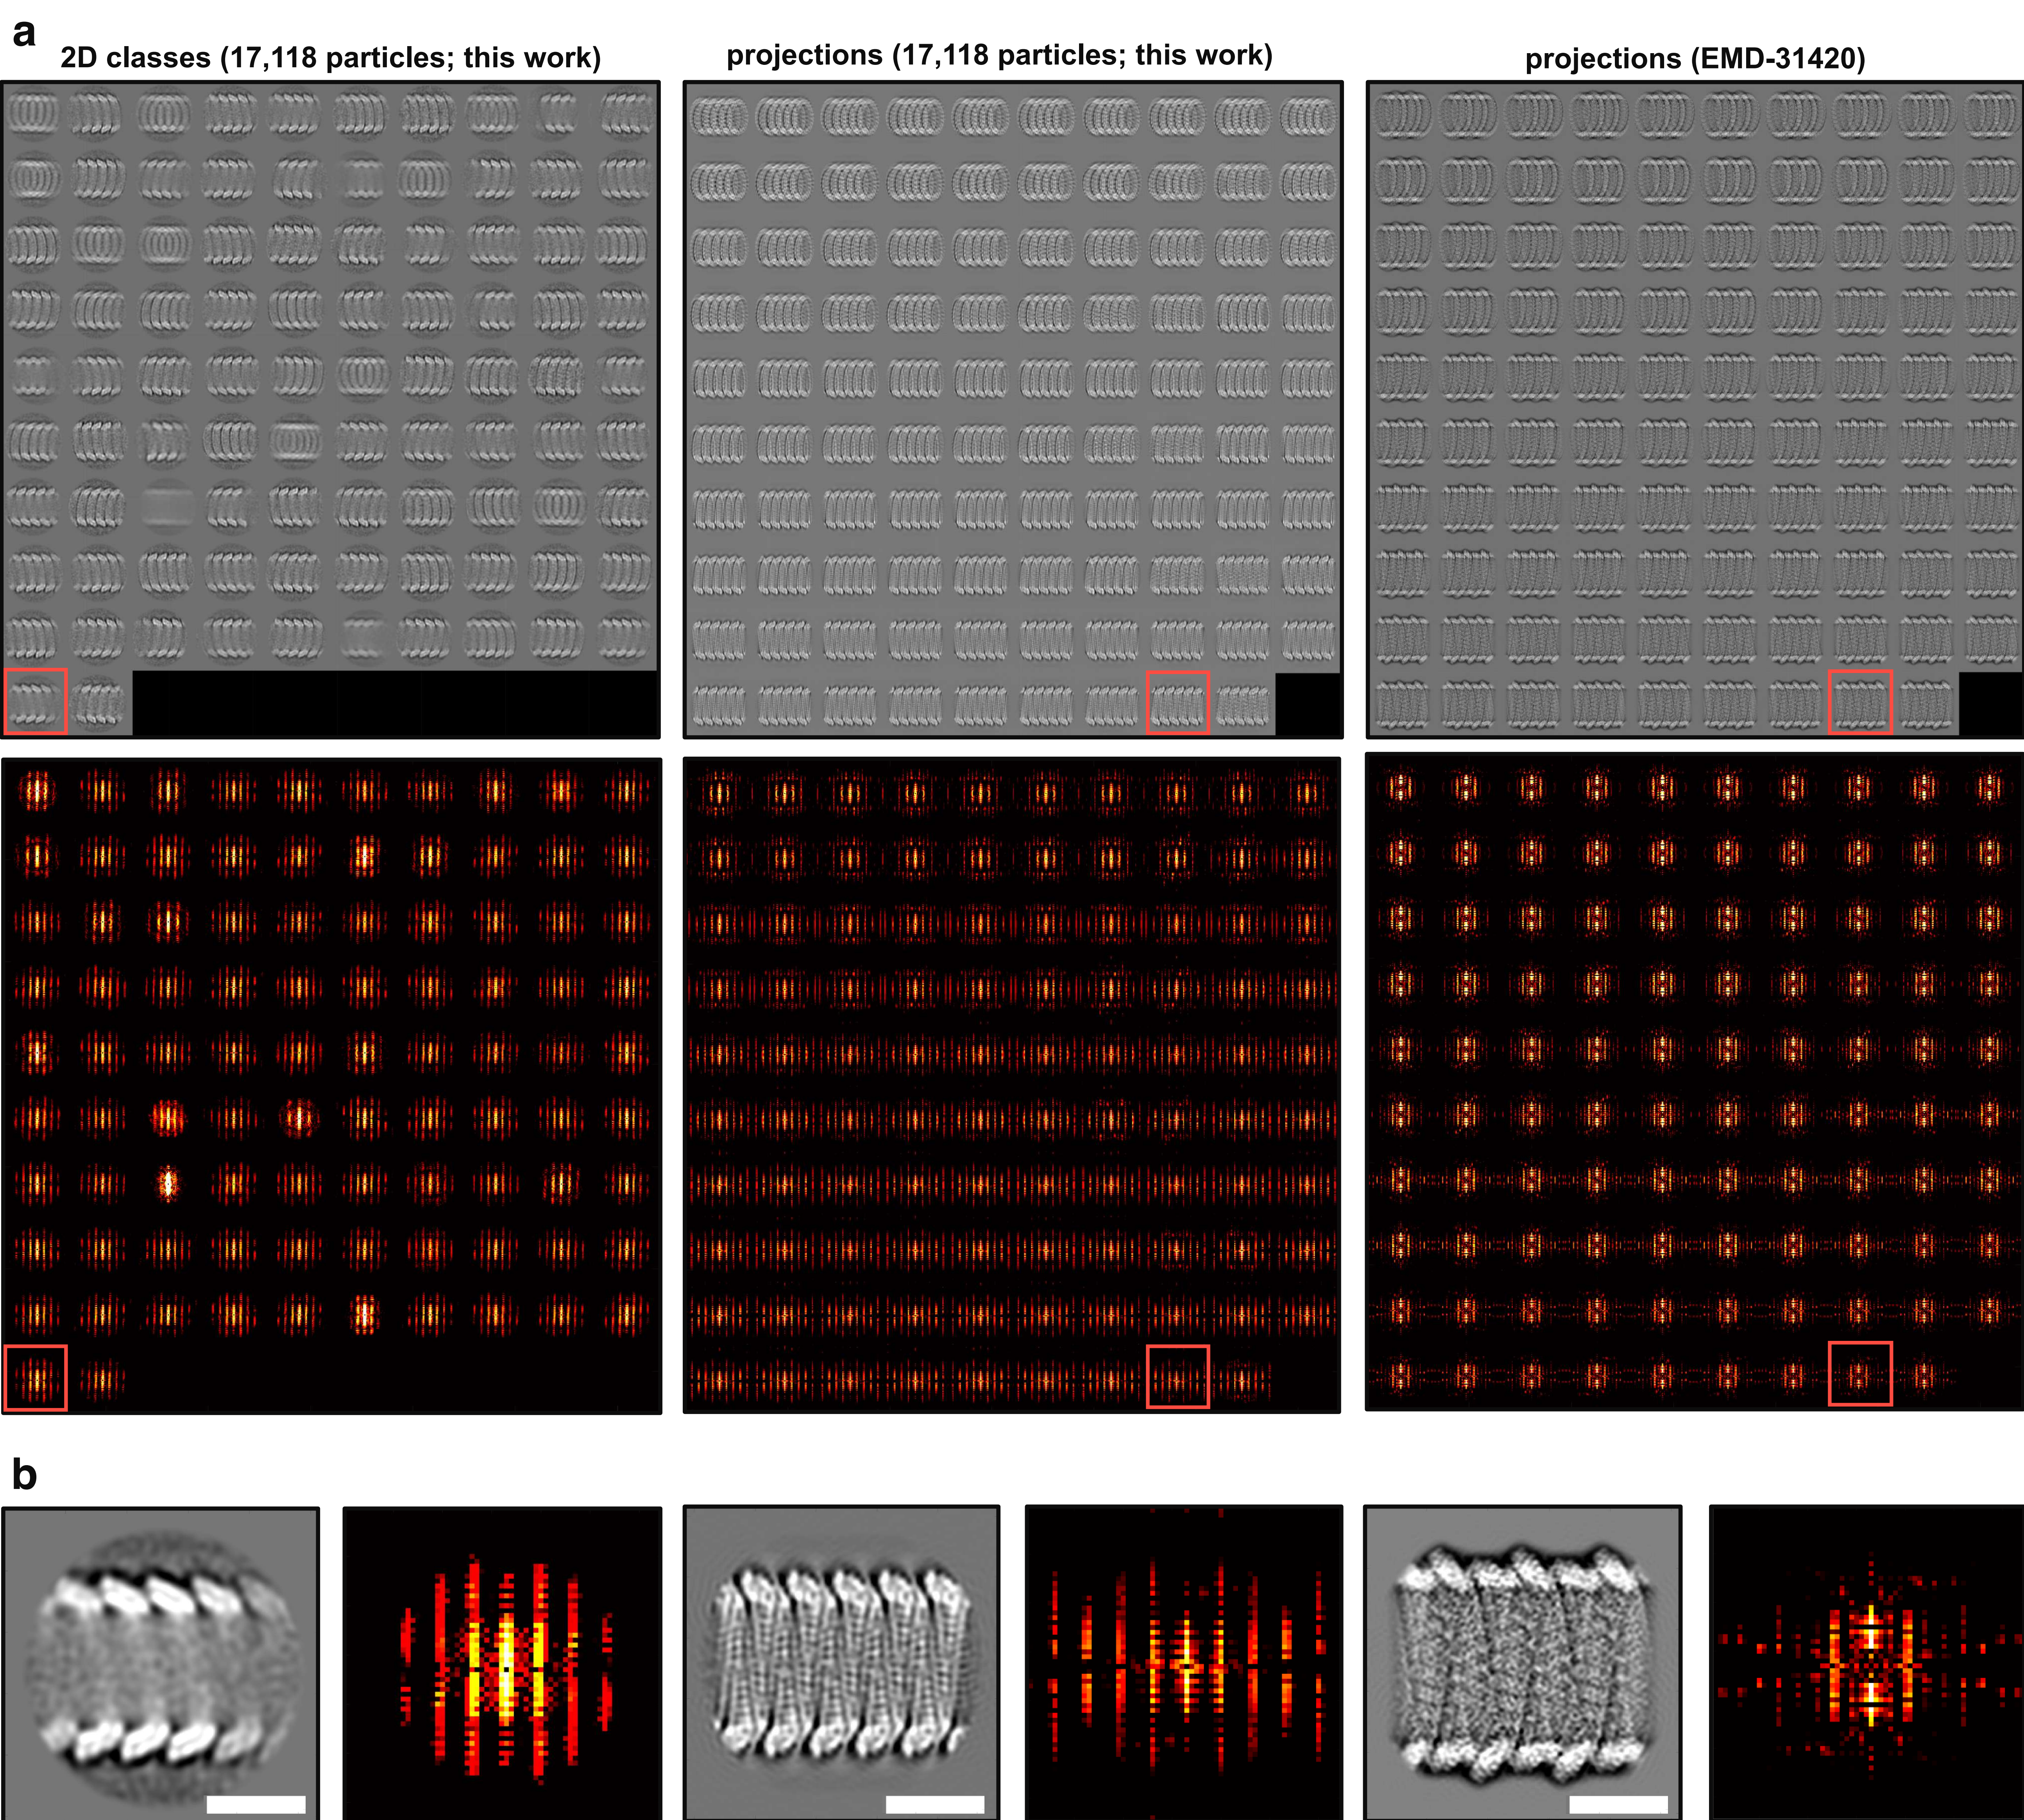

**Supplementary Fig. 4. Power spectra analysis of the single- and double-layered MARV RNP complexes.** Comparative overview of the class averages from 2D classification (upper left panel) and real space projections of the map (upper middle panel) of the single-layered MARV RNP complex (this work), with the real space projections of the map (upper right panel) of the double-layered one (EMD-31420), and their corresponding power spectra (left, middle and right lower panel, respectively); representative real space 2D class averages, projections of the map and power spectra, respectively, are highlighted by red squares. **b**, zoomed views of representative 2D class averages (left panel), real space projections of the map (middle panel) of the single-layered MARV RNP complex (this work), and real space projection of the map of the double-layered one (EMD-31420), with different pattern of layer lines shown by their respective power spectra (scale bar, 15 nm).



**a**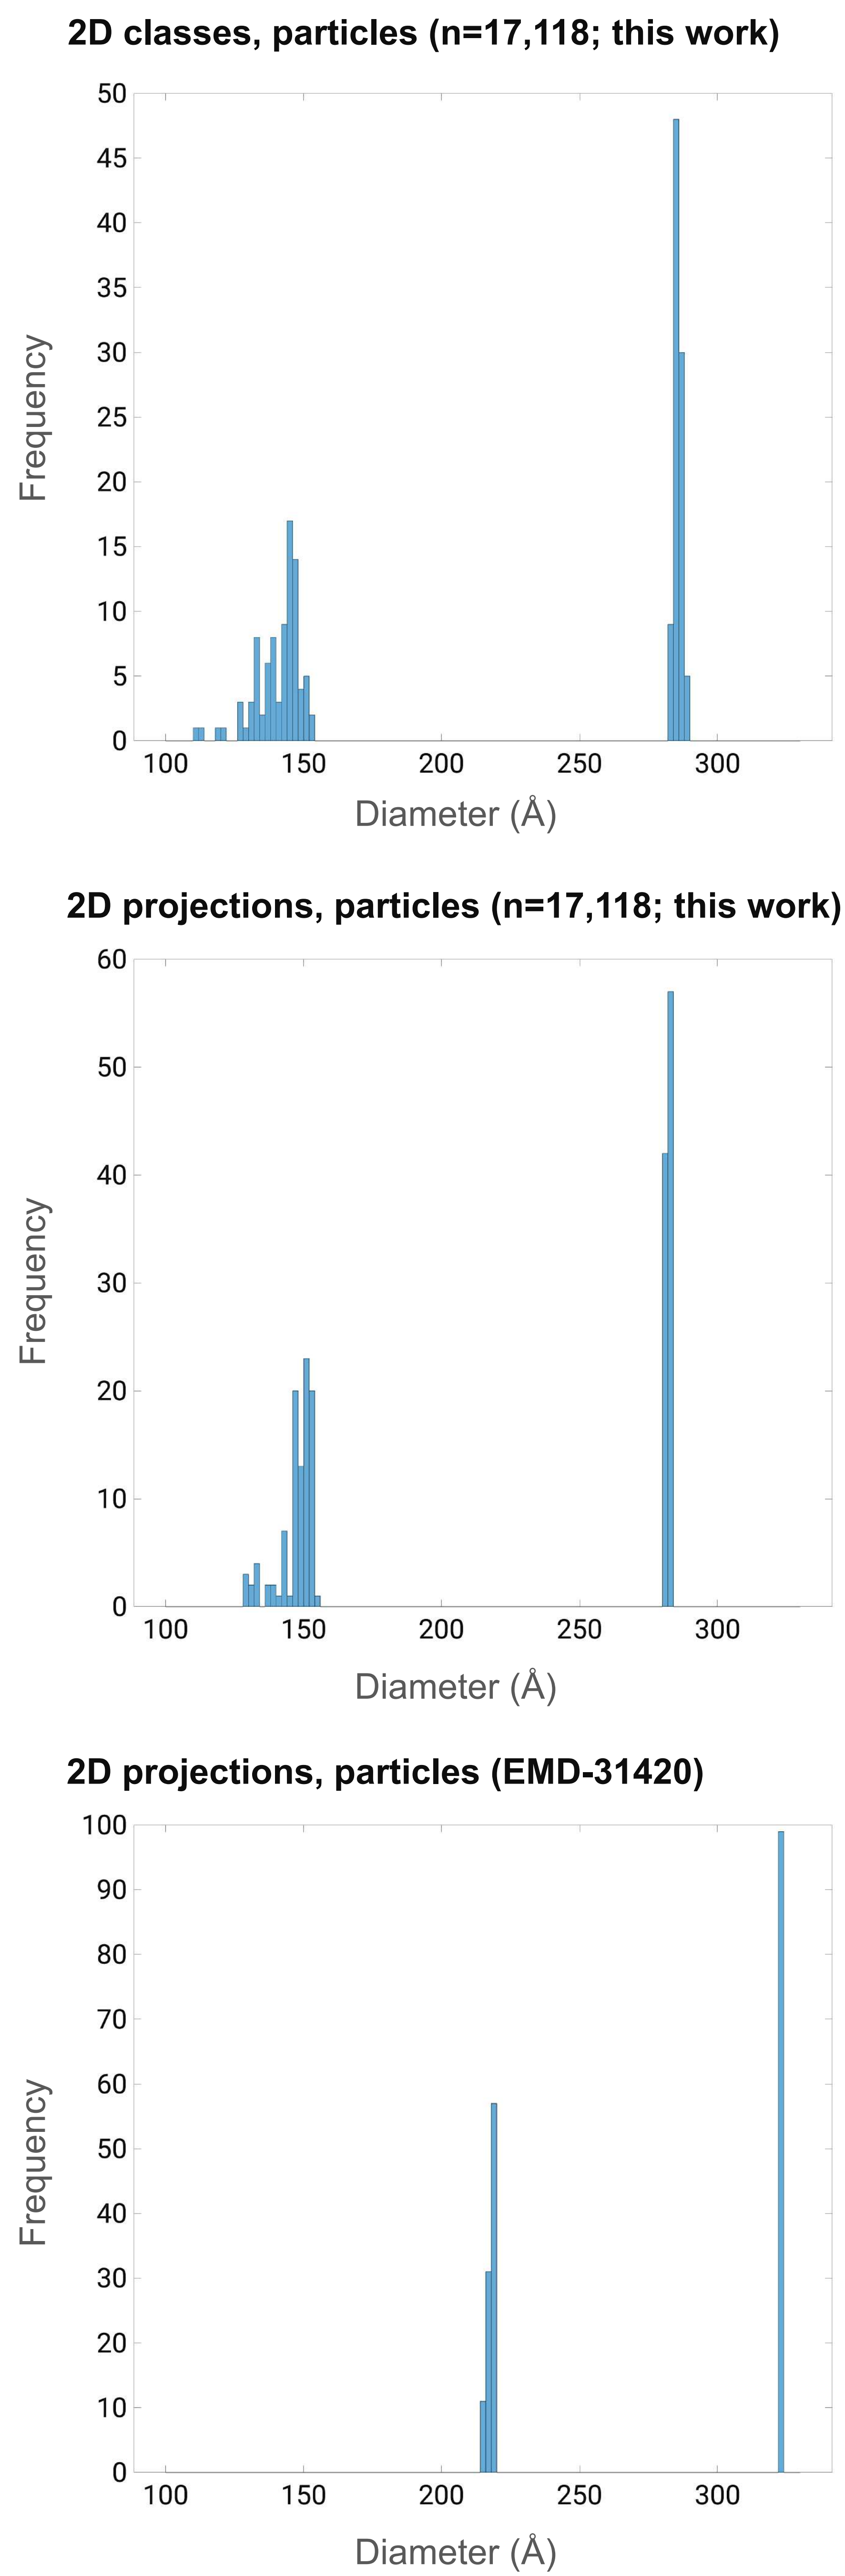**b**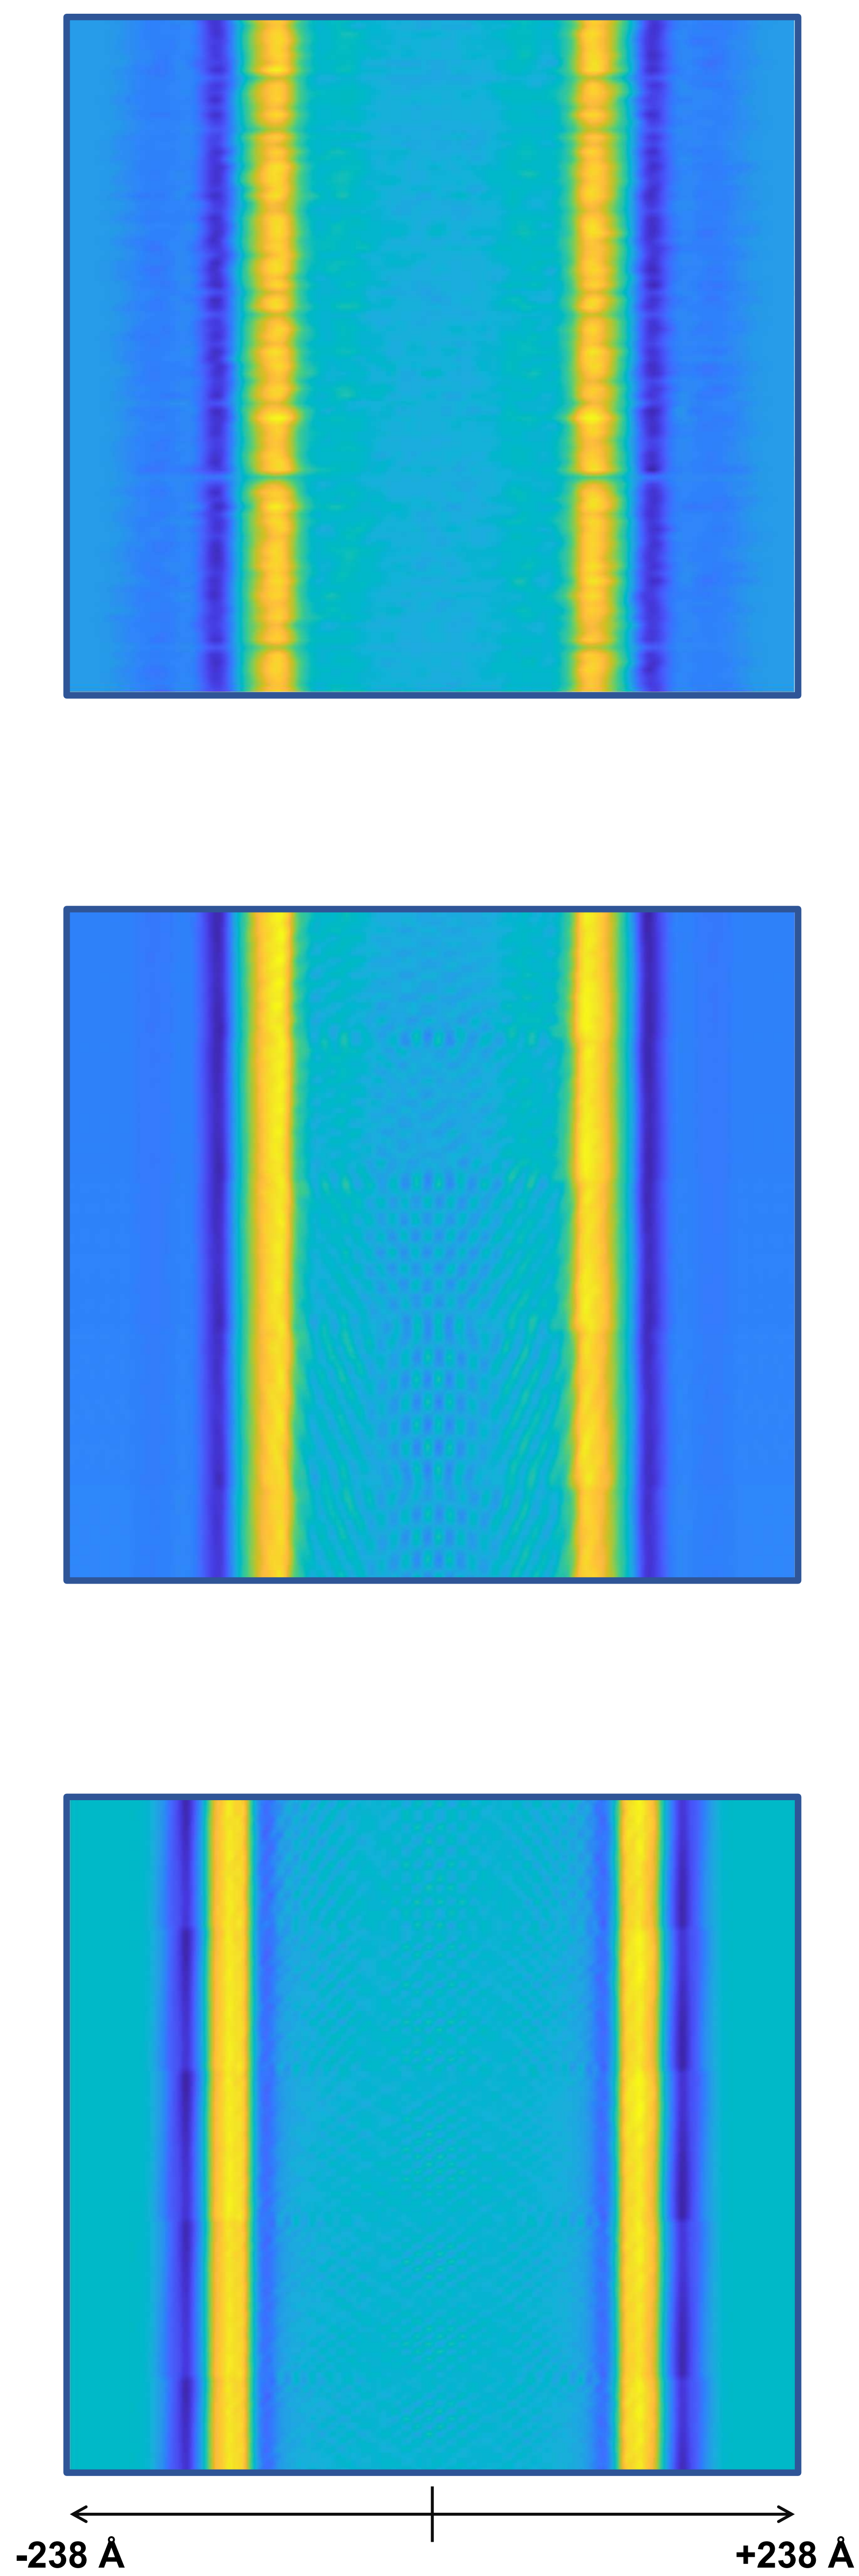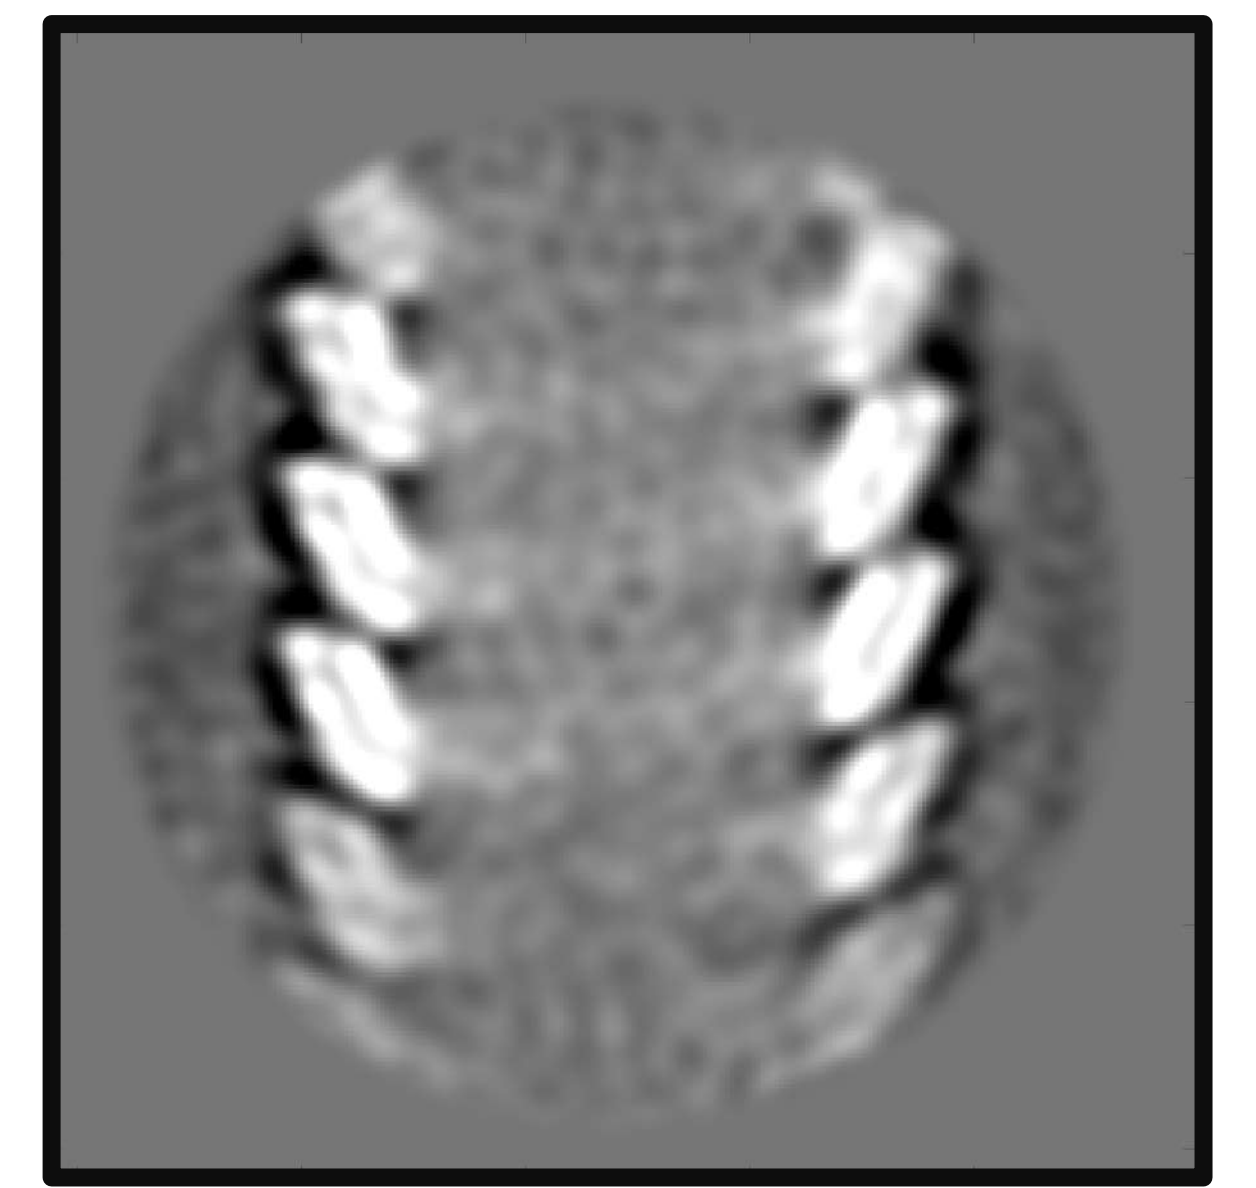**projection**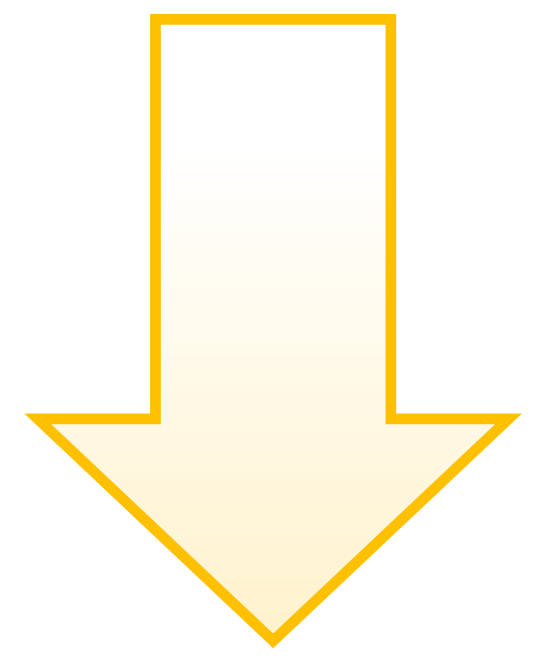**profile**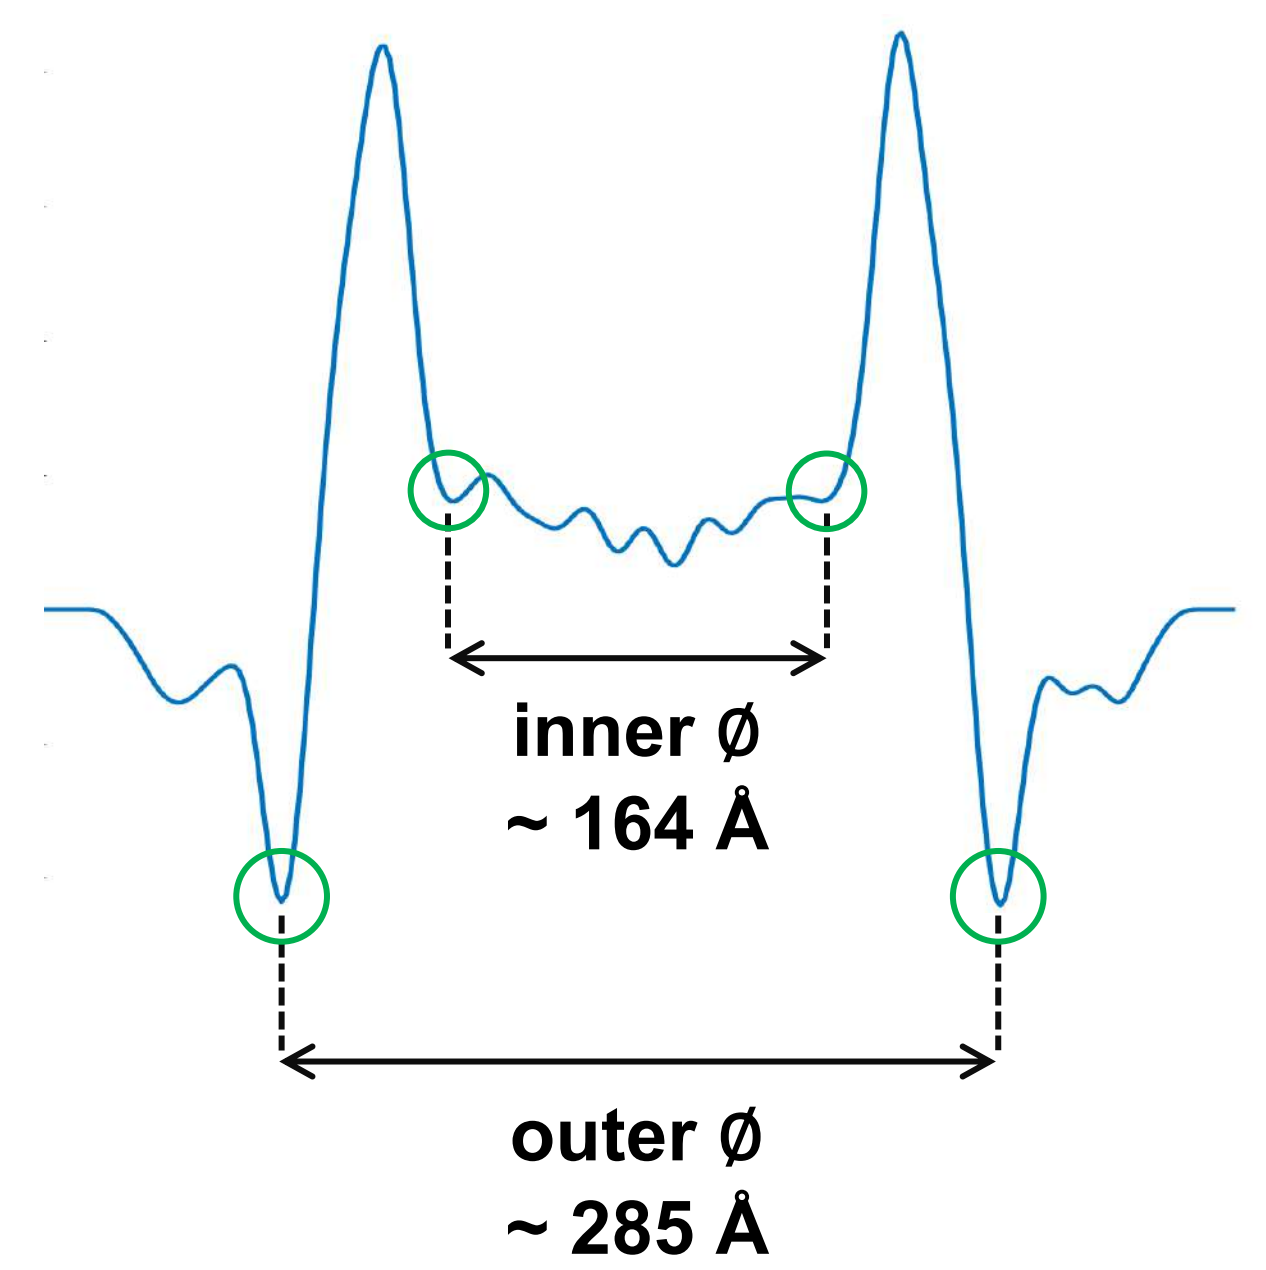

**Supplementary Fig. 5. Diameter analysis of single- and double-layered MARV RNP complexes.** **a**, comparative overview of histograms for inner and outer diameter (left panels) and stacked line profiles (right panels). **b**, representative determination of inner and outer diameter for one 2D-class average image.



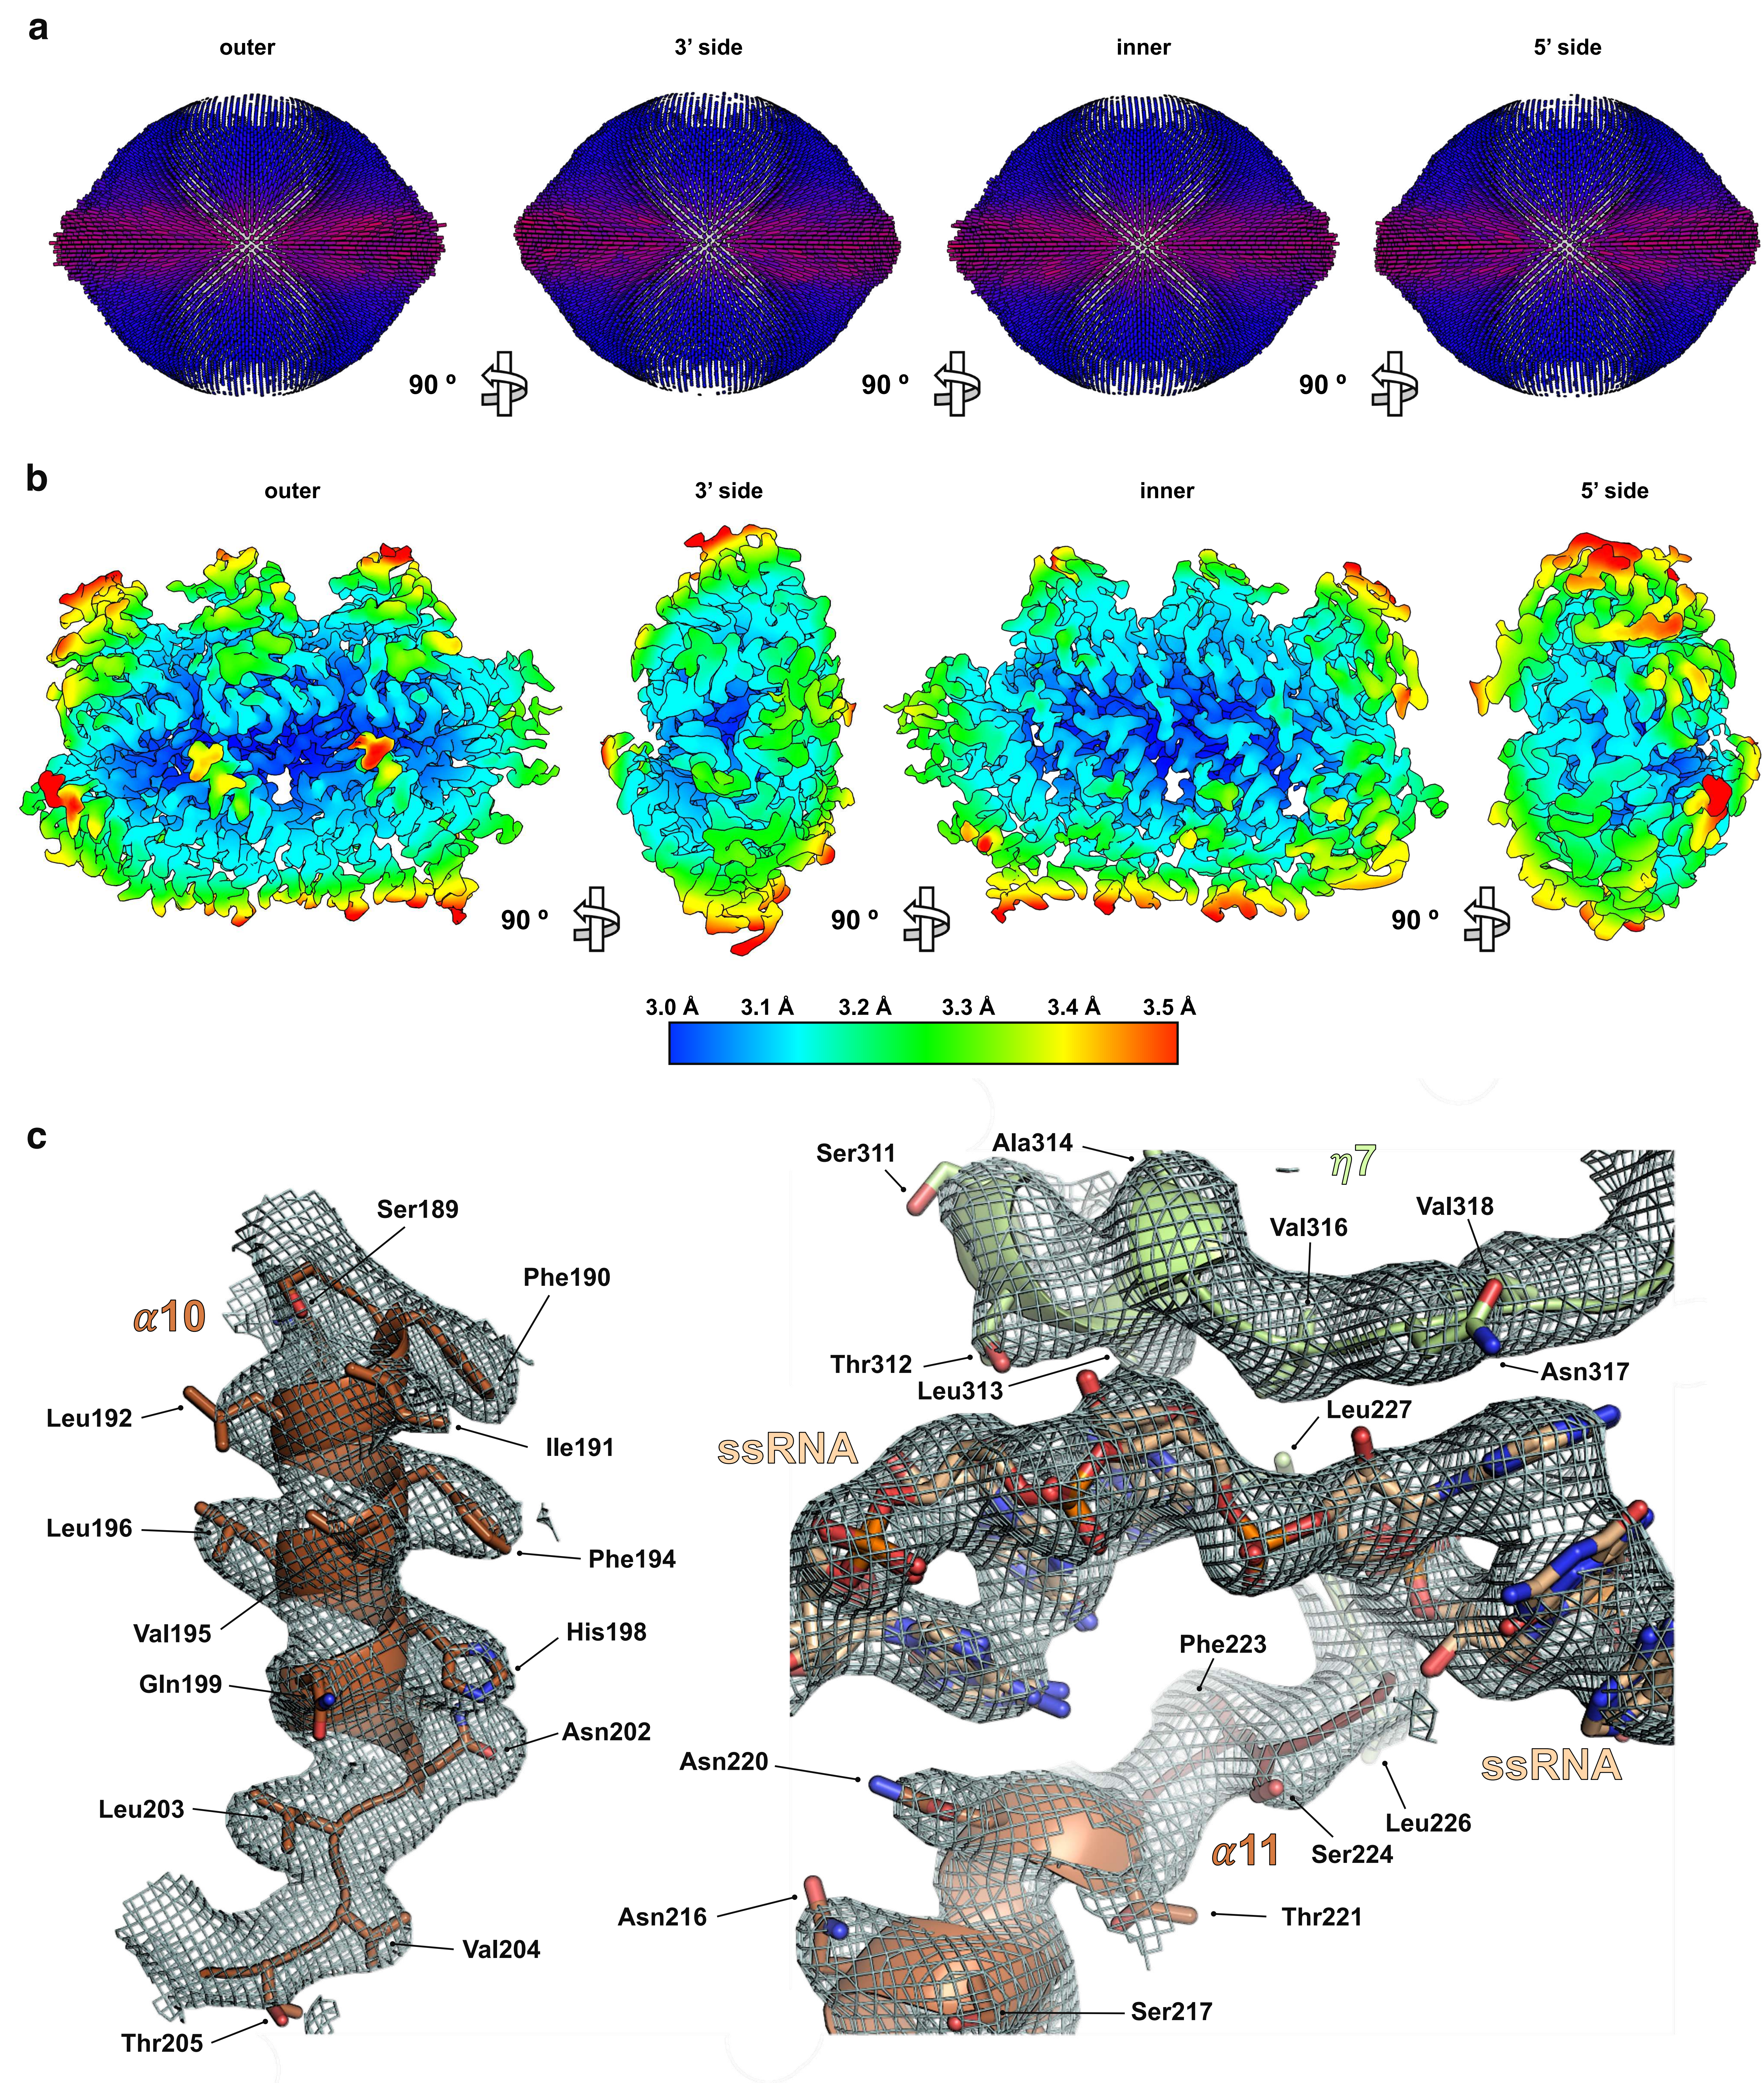

**Supplementary Fig. 6. Cryo-EM analysis of the trimeric asymmetric unit of single-layered MARV RNP complex.** **a**, Euler angle distribution of views that contributed to the 3D reconstruction of the single-layered MARV RNP complex trimeric repeat unit, shown in four orthogonal views. **b**, Local resolution of the cryo-EM density map of the single-layered MARV RNP complex trimeric repeat unit, shown in four orthogonal views (rainbow color scale bar, from 3.0 to 3.5 Å). **c**, Superposition of atomic model and cryo-EM density map of key structural elements of the single-layered MARV RNP complex protomer, including helix  $\alpha 10$  (left) and helices  $\alpha 11$ ,  $\eta 7$  and ssRNA (right); models and densities are shown in ribbon and mesh representation, respectively, with side chains of key residues fitted into the density map highlighted as sticks.



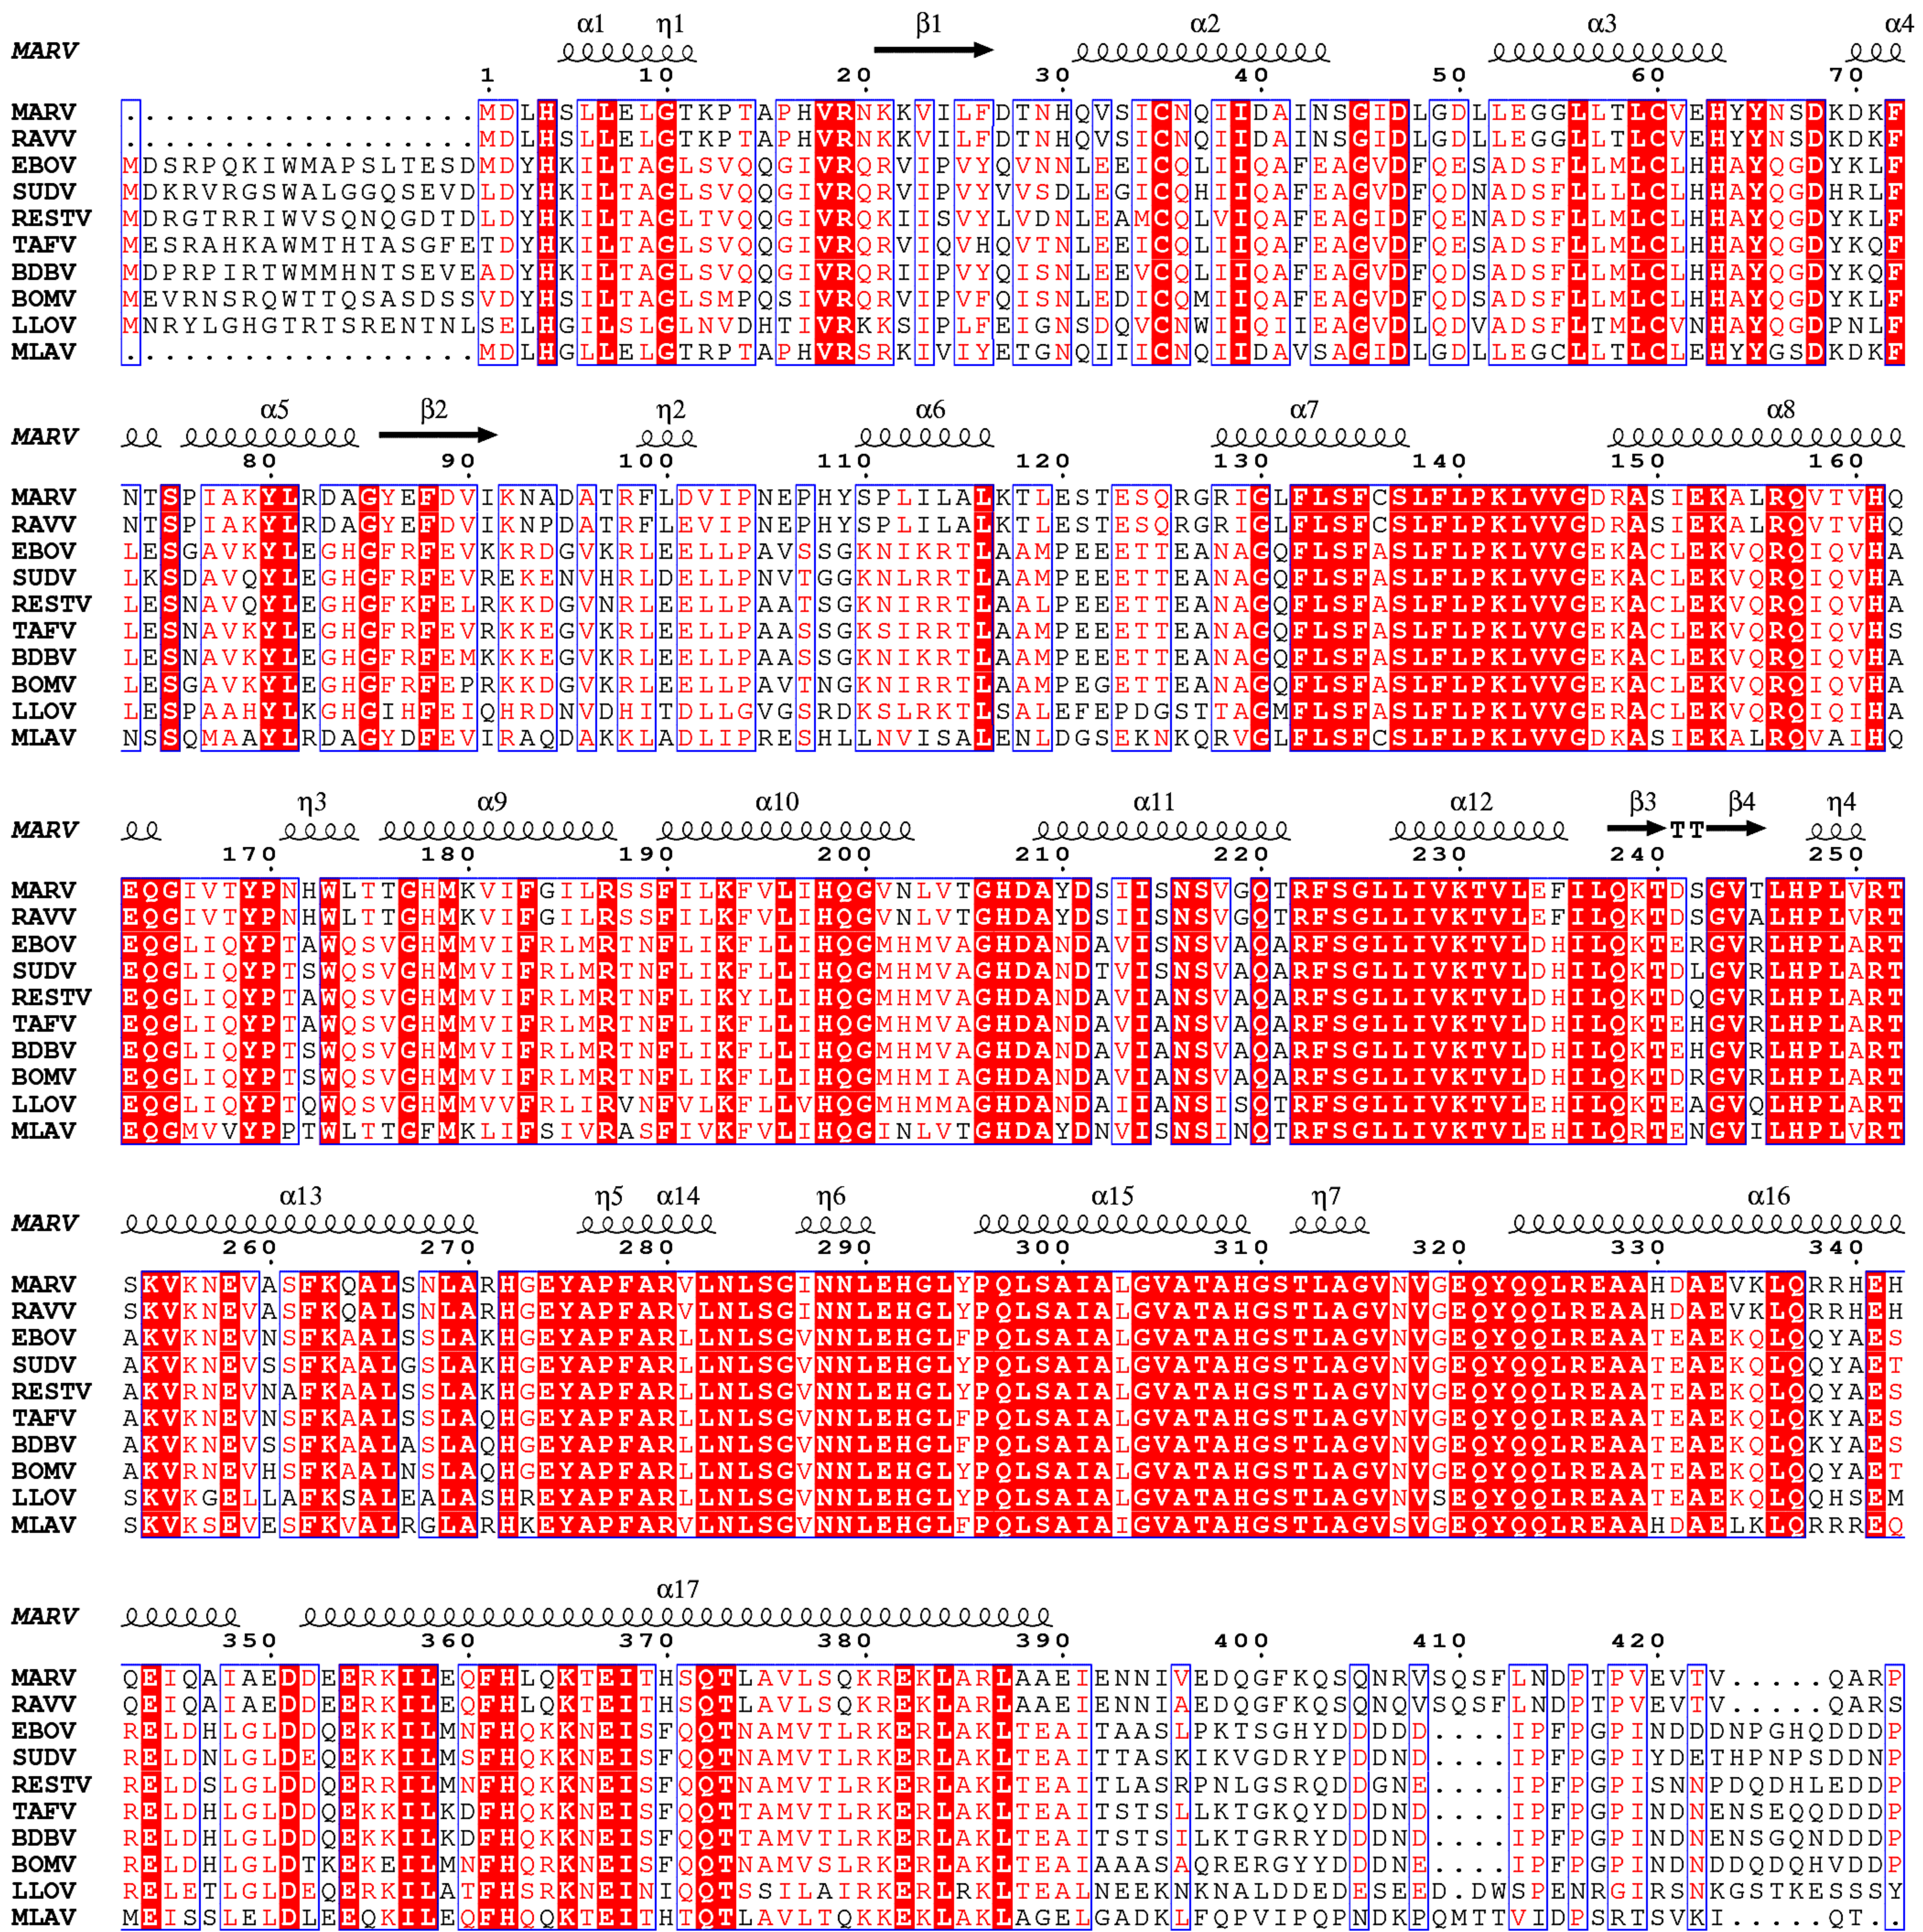

**Supplementary Fig. 7. Comparative topology of filoviral NP<sub>core</sub> based on MARV structure consensus.** Multiple amino acid sequence alignment of reference NP sequences (aa 1-427, MARV numbering) within the family *Filoviridae*, performed using RefSeq amino acid sequences from NCBI Protein database YP\_001531153.1 (MARV), YP\_009055222.1 (RAVV), NP\_066243.1 (EBOV), YP\_138520.1 (SUDV), NP\_690580.1 (RESTV), YP\_003815423.1 (TAFV), YP\_003815432.1 (BDBV), YP\_009513274.1 (BOMV), YP\_004928135.1 (LLOV) and YP\_010087183.1 (MLAV). The secondary structure topology scheme from the MARV NP<sub>core</sub> atomic model (this work) is used as consensus and displayed above the aligned sequences.



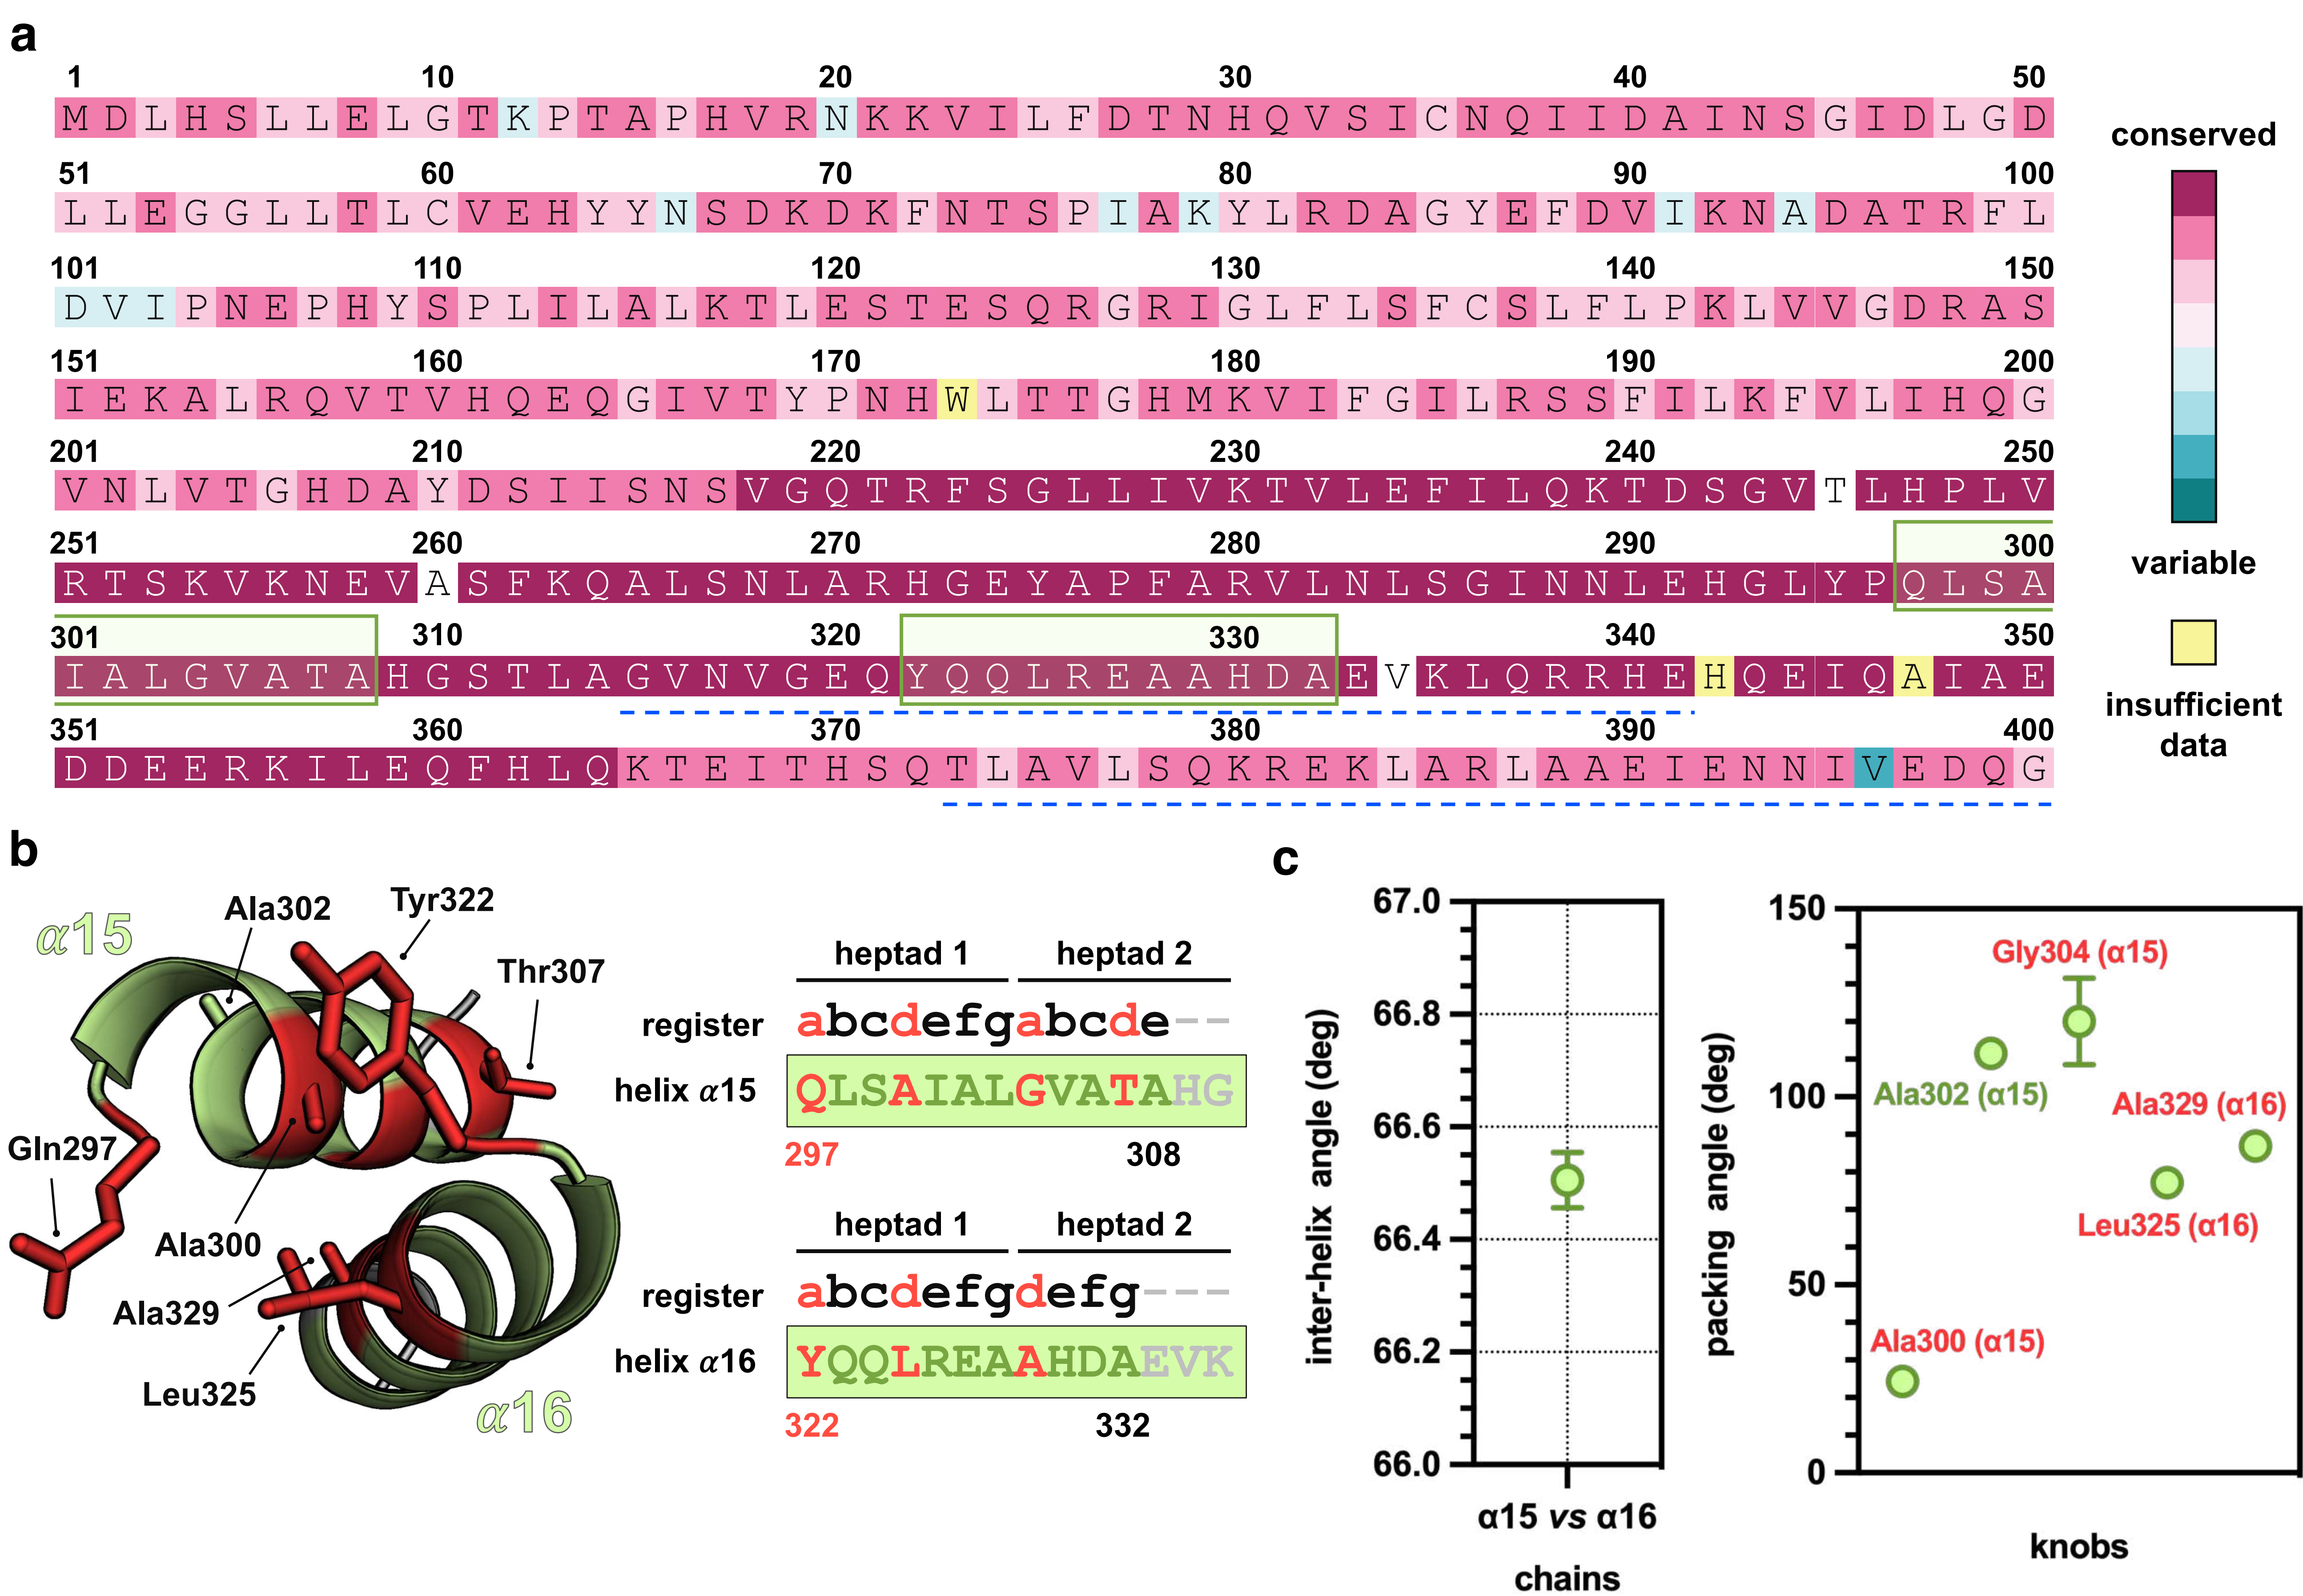

**Supplementary Fig. 8. Highly conserved non-canonical coiled-coil motifs in MARV NP<sub>core</sub> C-lobe.** **a**, amino acid residue similarity calculated within the *Orthomarburgvirus* genus over all 143 sequences available in the Bacterial and Viral Bioinformatics Resource Center (BV-BRC) database (<https://www.bv-brc.org>, last access on May 8<sup>th</sup>, 2023) and mapped onto the reference MARV NP sequence (aa 1-400, RefSeq NCBI Protein YP\_001531153.1); 0% to 100% conservation is shown as teal-to-magenta scale, residue positions with insufficient data for conservation score calculation are shown in yellow; regions predicted to harbor a coiled-coil motif essential for NP oligomerization and viral RNA synthesis (as described in DiCarlo et al., 2007, *Virology*) are highlighted by blue dashed underlines, whereas those within them identified in this work as involved in a dimeric intra-chain coiled-coil are boxed in green. **b**, ribbon representation (left panel) of the intra-chain non-canonical, dimeric coiled-coil established between C-lobe  $\alpha 15$  and  $\alpha 16$ , with heptad register and per-chain amino acid sequence (right panel); coiled-coil knobs side chains and residue positions are highlighted in red, whereas residues that do not follow coiled-coil packing are highlighted in light gray. **c**, inter-helix (left) and knob-packing (right) angles in the intra-chain non-canonical dimeric coiled-coil of MARV NP<sub>core</sub> C-lobe; plotted values and errors are the mean and SD, respectively, measured among protomers of an arbitrary minimal hexameric unit within the RNP helix.



a

this work

PDB: 7F1M

(Fujita-Fujiharu et al., 2022 *Nature Communications*)

| features                   | single-layered            | double-layered            |
|----------------------------|---------------------------|---------------------------|
| handedness ( <i>h</i> )    | <i>h</i> (-), left-handed | <i>h</i> (-), left-handed |
| outer diameter             | 285 Å                     | 330 Å                     |
| inner diameter             | 164 Å                     | 255 Å                     |
| rise ( $\Delta z$ )        | 2.87 Å                    | 4.23 Å                    |
| twist ( $\Delta \varphi$ ) | 14.73 °                   | 11.8052 °                 |
| n. subunits/turn           | 24.4                      | 30.5                      |
| pitch ( <i>p</i> )         | 70.14 Å                   | 128.99 Å                  |

b

side

top

bottom

90 °

180 °

-10

kTe<sup>-1</sup>

+10

this work

side

top

bottom

90 °

180 °

-10

kTe<sup>-1</sup>

+10

PDB: 7F1M

**Supplementary Fig. 9. Different conformations of the MARV RNP complex.** **a**, comparative table summarizing features and helical parameters that differ between the single-layered MARV RNP complex (this work) and the previously described double-layered one (PDB: 7F1M). **b**, electrostatic surface potential calculation illustrates differences in surface charge between the MARV RNP complex in single-layer (this work) and the one in double-layer (PDB: 7F1M) conformation, both displayed as isosurface representation in three orthogonal directions; red, white and blue regions represent areas of negative, neutral, and positive electrostatic surface potential, respectively (color scale bar, from -10.0 to +10.0 kT e<sup>-1</sup>).



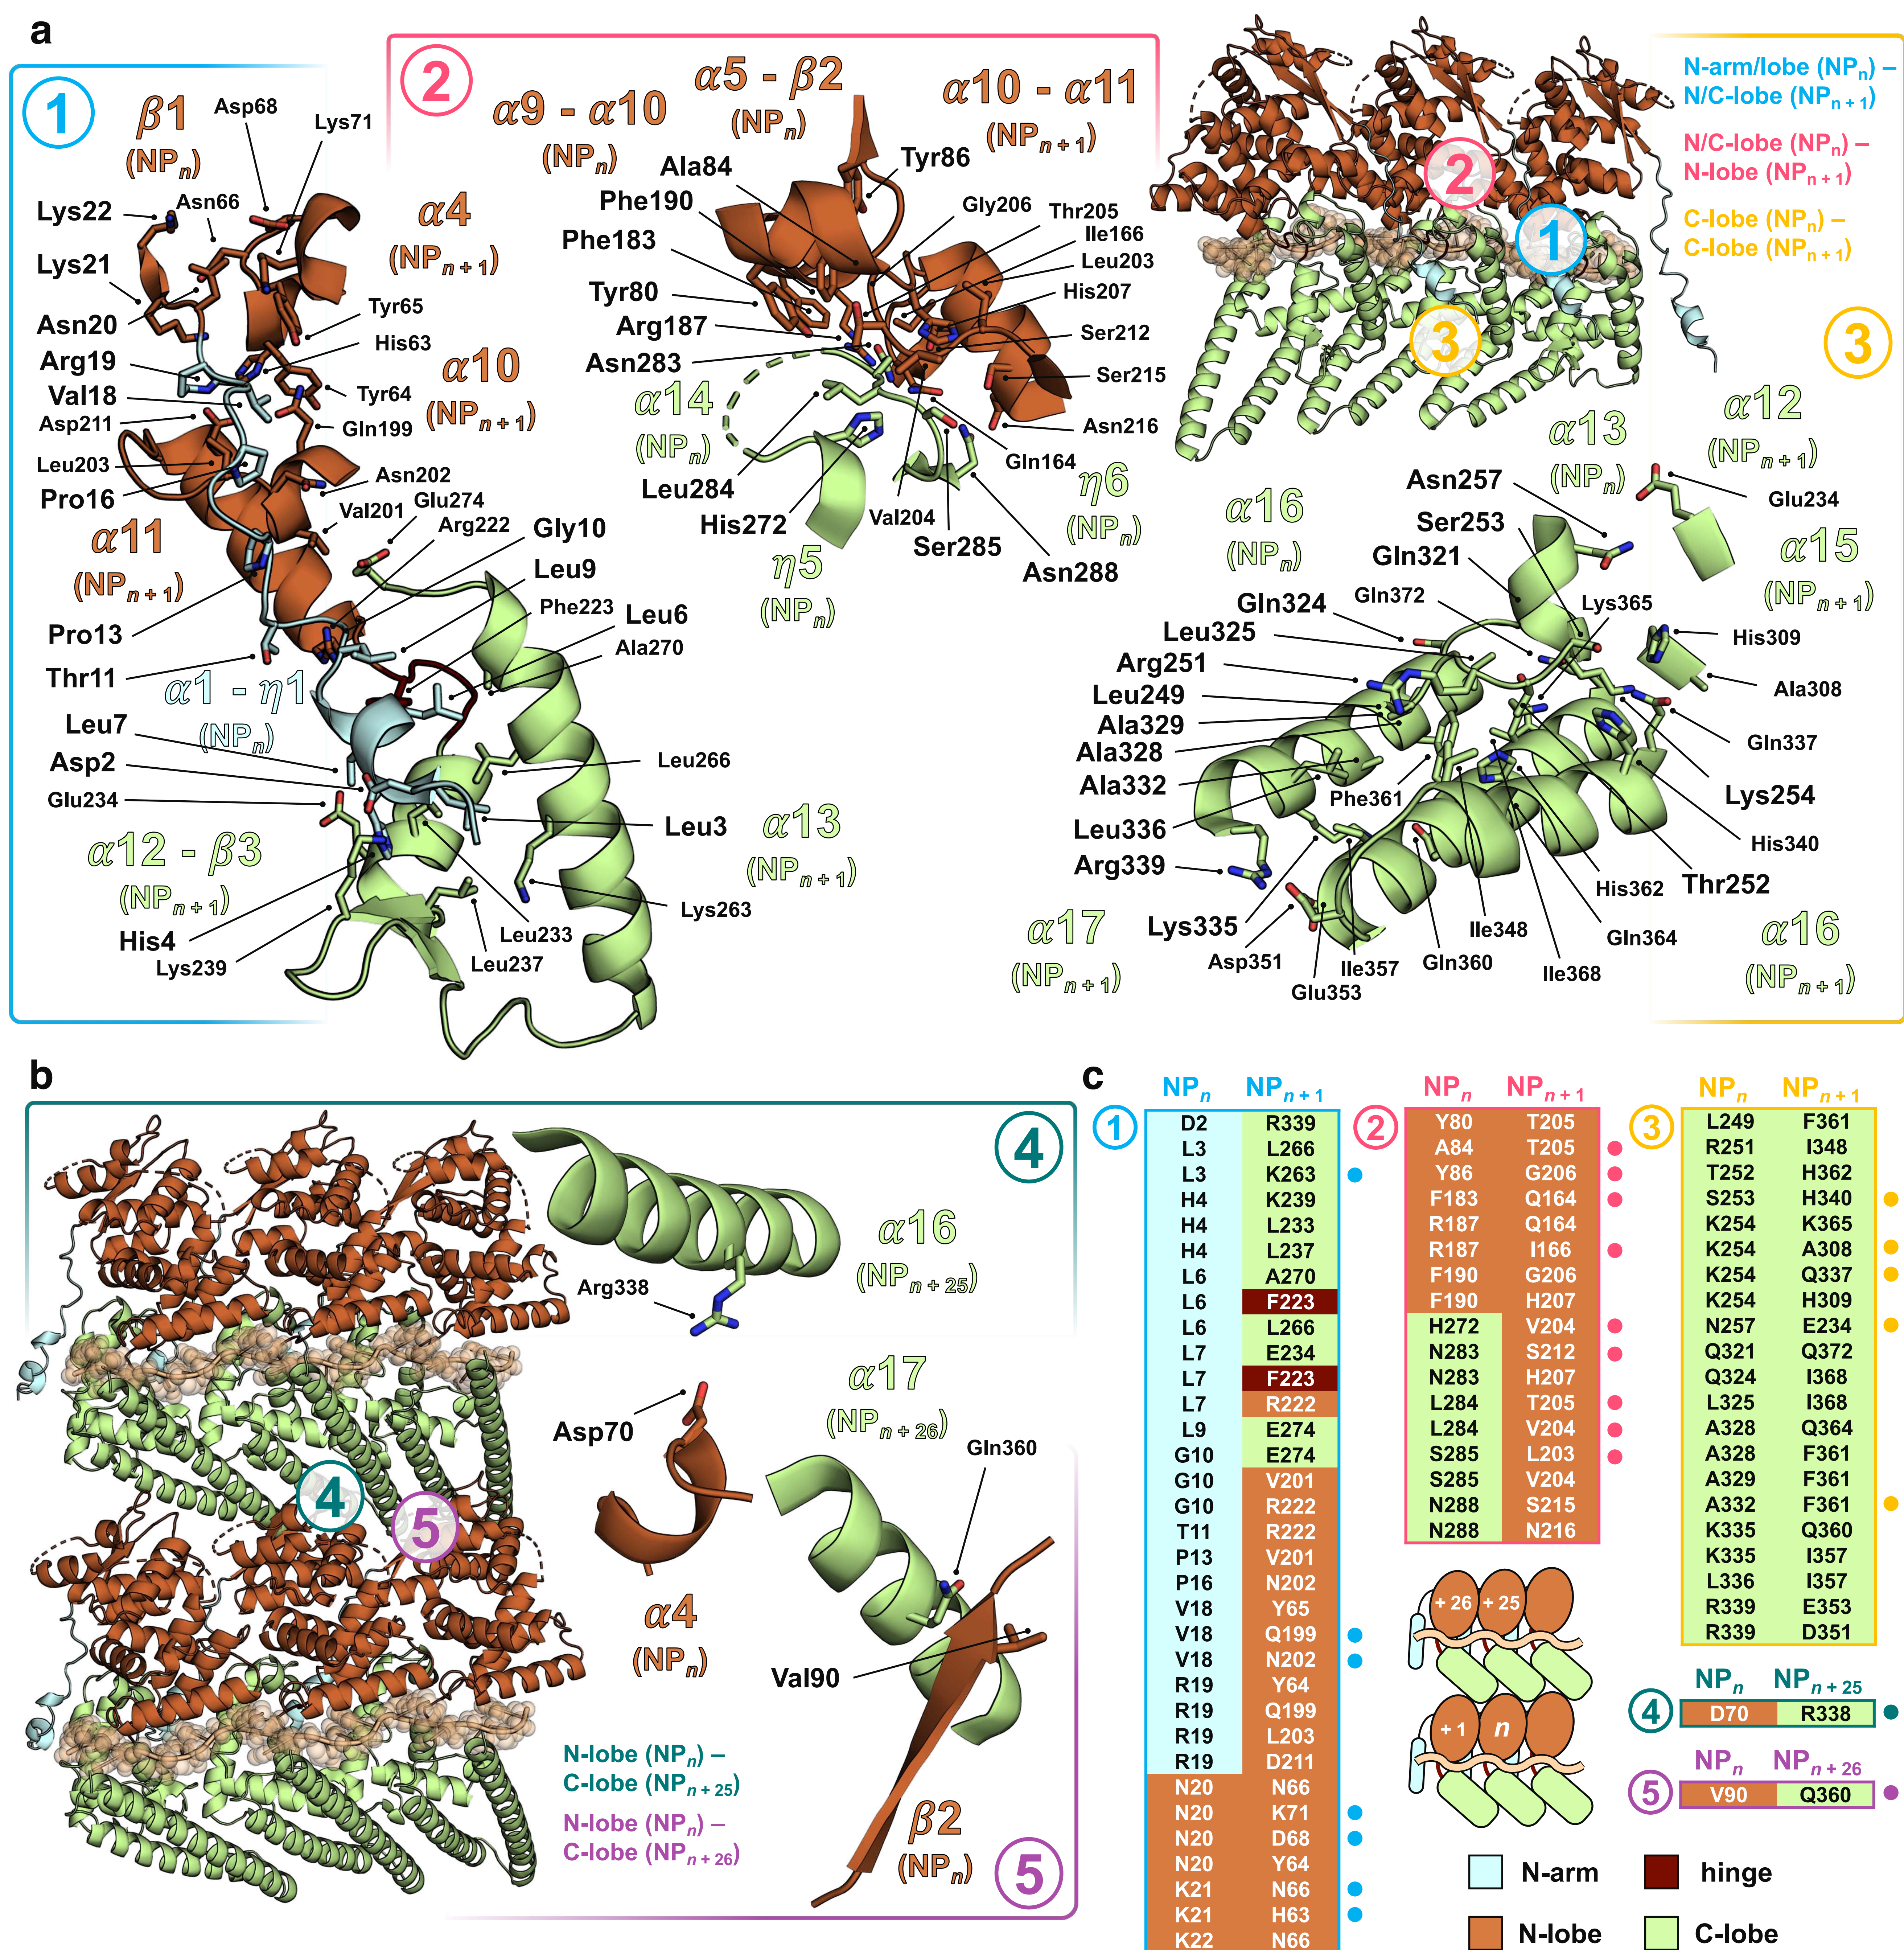

**Supplementary Fig. 10. Structural details of single-layered MARV RNP complex ( $NP_{core}$  homo-oligomerization).** **a**, ribbon representation of a trimeric minimal unit (top) and close-up (insets) showing the three types of intra-strand interactions between any arbitrary protomer  $NP_n$  and its adjacent neighbor  $NP_{n+1}$ ; interaction 1, involving the N-arm and N-lobe of  $NP_n$ , and the N-lobe, hinge and C-lobe of  $NP_{n+1}$ ; interaction 2, involving the N-lobe and C-lobe of  $NP_n$ , and the N-lobe of  $NP_{n+1}$ ; interaction 3, involving the C-lobe of  $NP_n$  and the C-lobe of  $NP_{n+1}$ . **b**, ribbon representation of a hexameric minimal unit (left) and close-up (insets) showing the two types of inter-strand interactions between any arbitrary protomer  $NP_n$  and its neighbors in the subsequent strand occupying the same position ( $NP_{n+25}$ ) and the subsequent one ( $NP_{n+26}$ ); interaction 4, involving the N-lobe of  $NP_n$  and the C-lobe of  $NP_{n+25}$ ; interaction 5, involving the N-lobe of  $NP_n$  and the C-lobe of  $NP_{n+26}$ . **c**, summary of the interacting residues (within 4 Å distance) leading to the assembly of MARV  $NP_{core}$  into the RNP complex via the five type of interactions between any arbitrary protomer  $NP_n$  and its neighbors  $NP_{n+1}$ ,  $NP_{n+25}$  and  $NP_{n+26}$ ; residue couples marked with a circle are unique (within 4 Å distance) of the MARV RNP complex in single-layer conformation.



**a**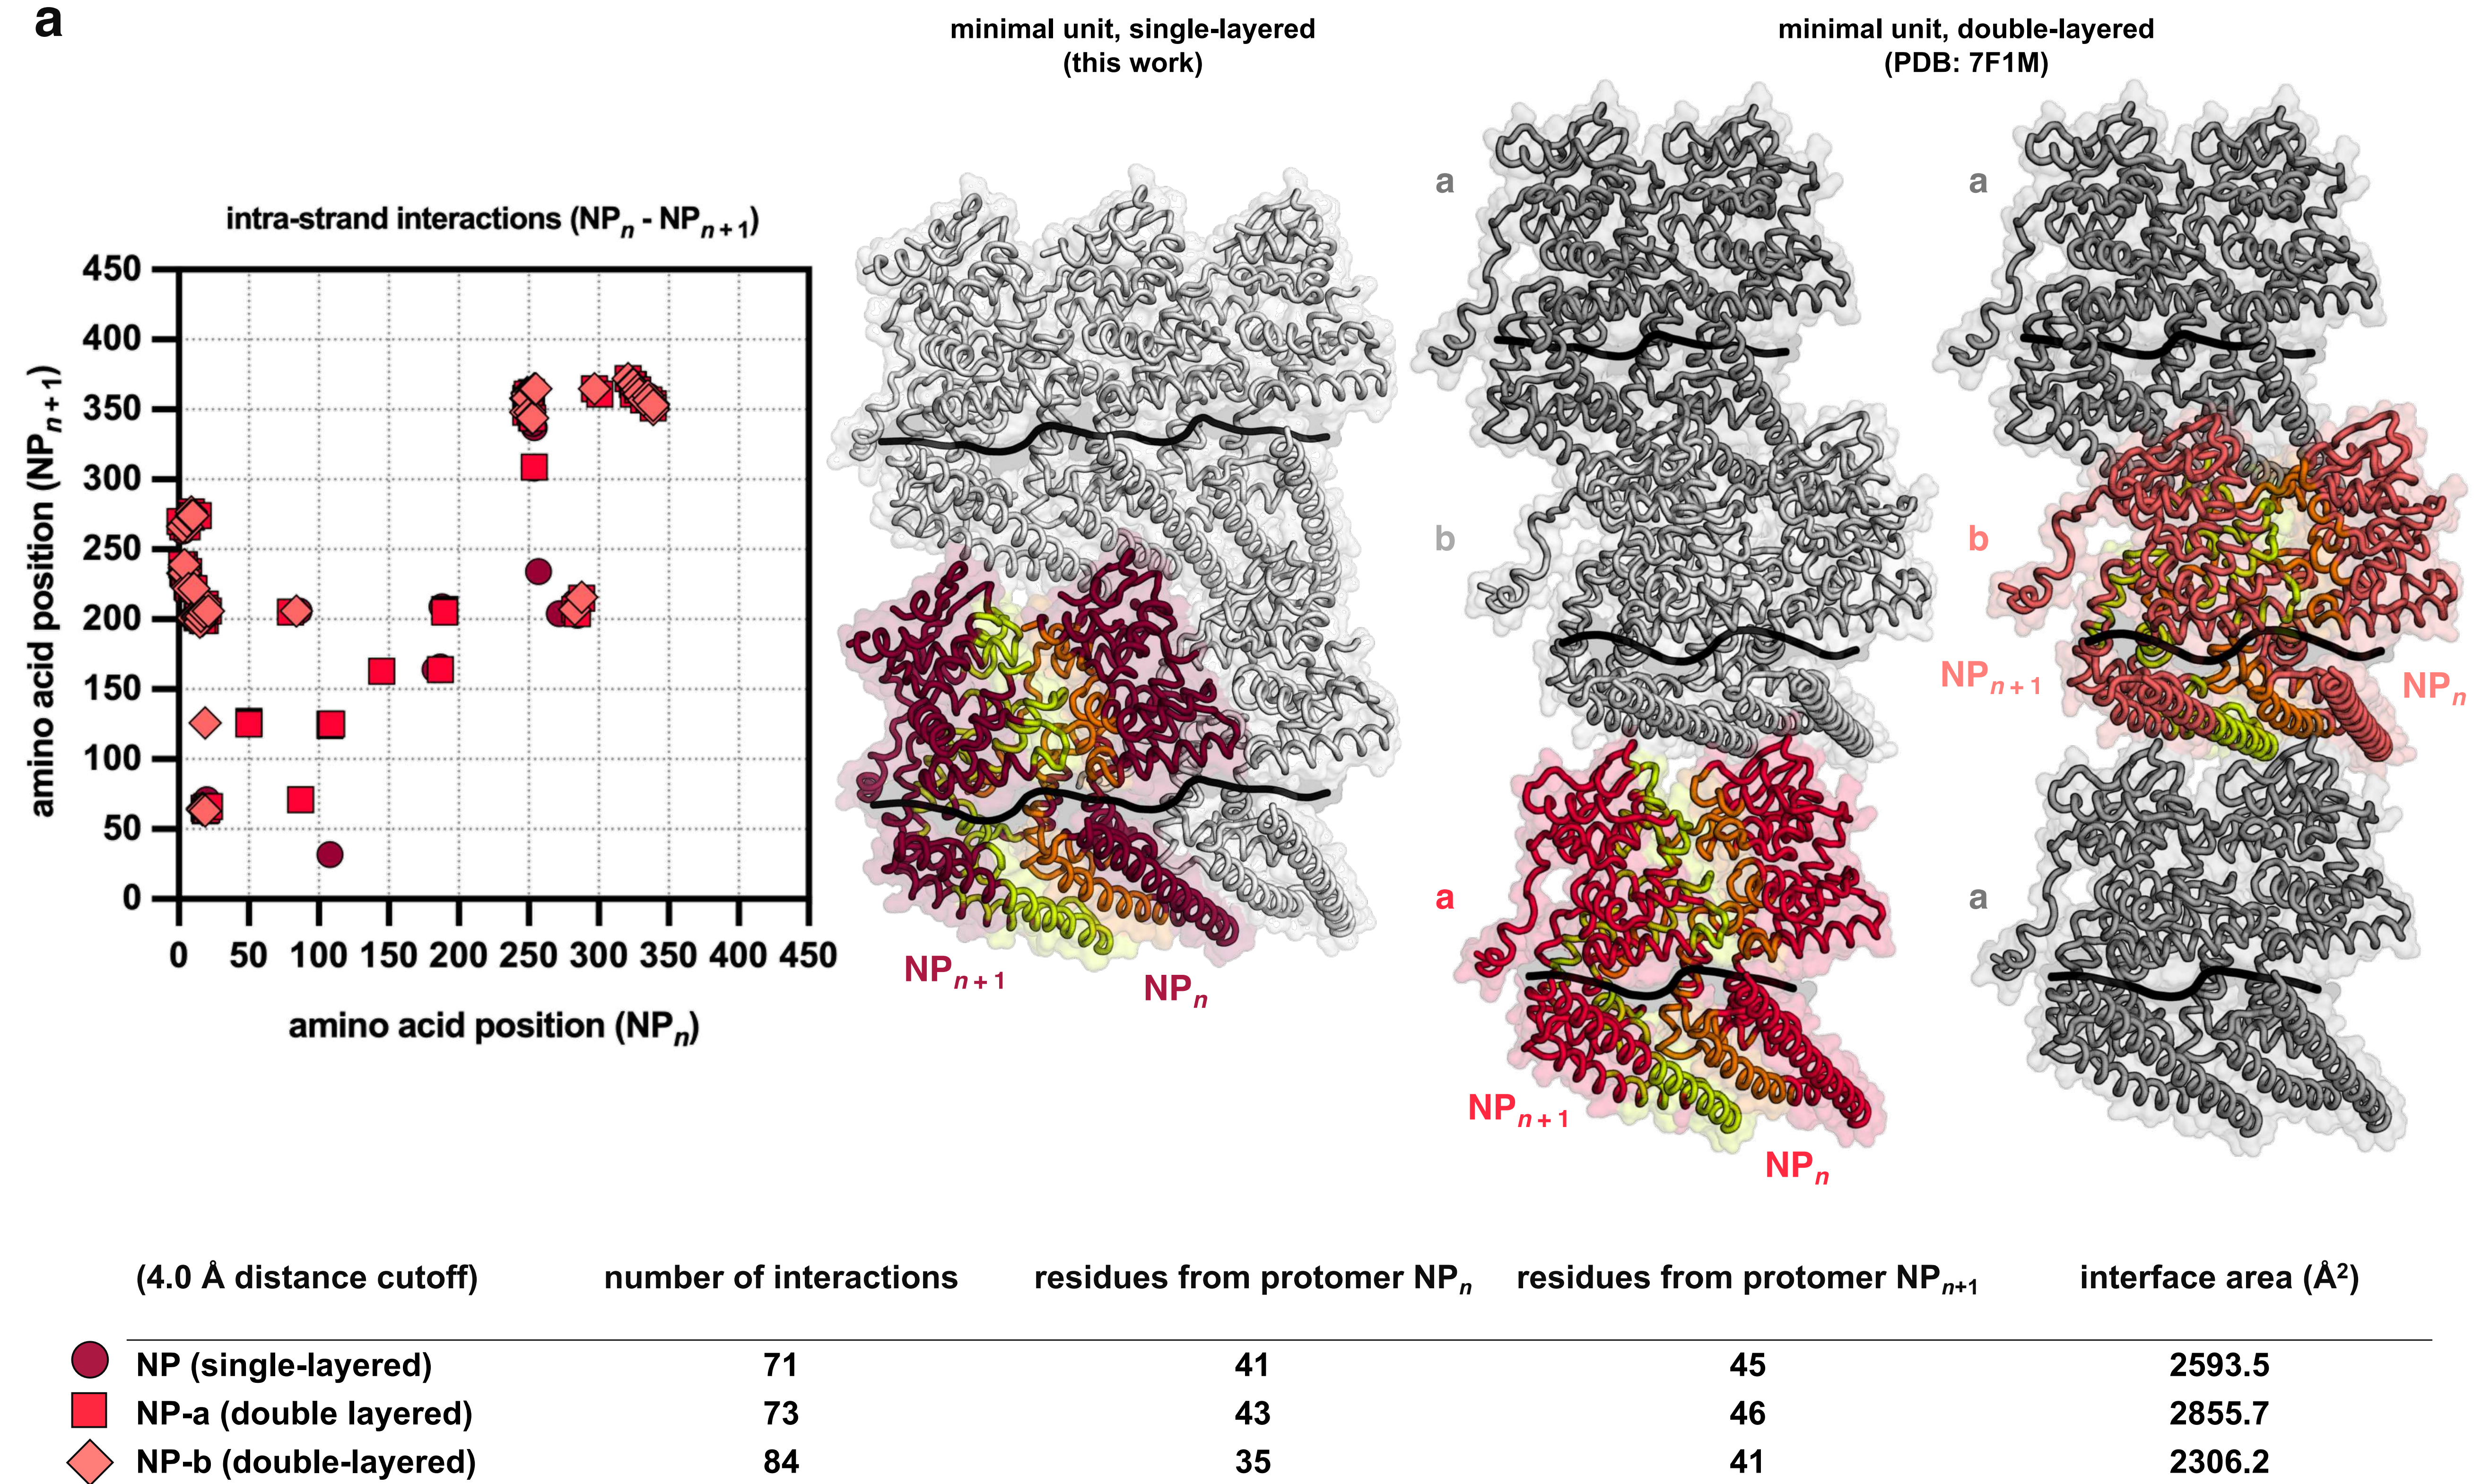**b**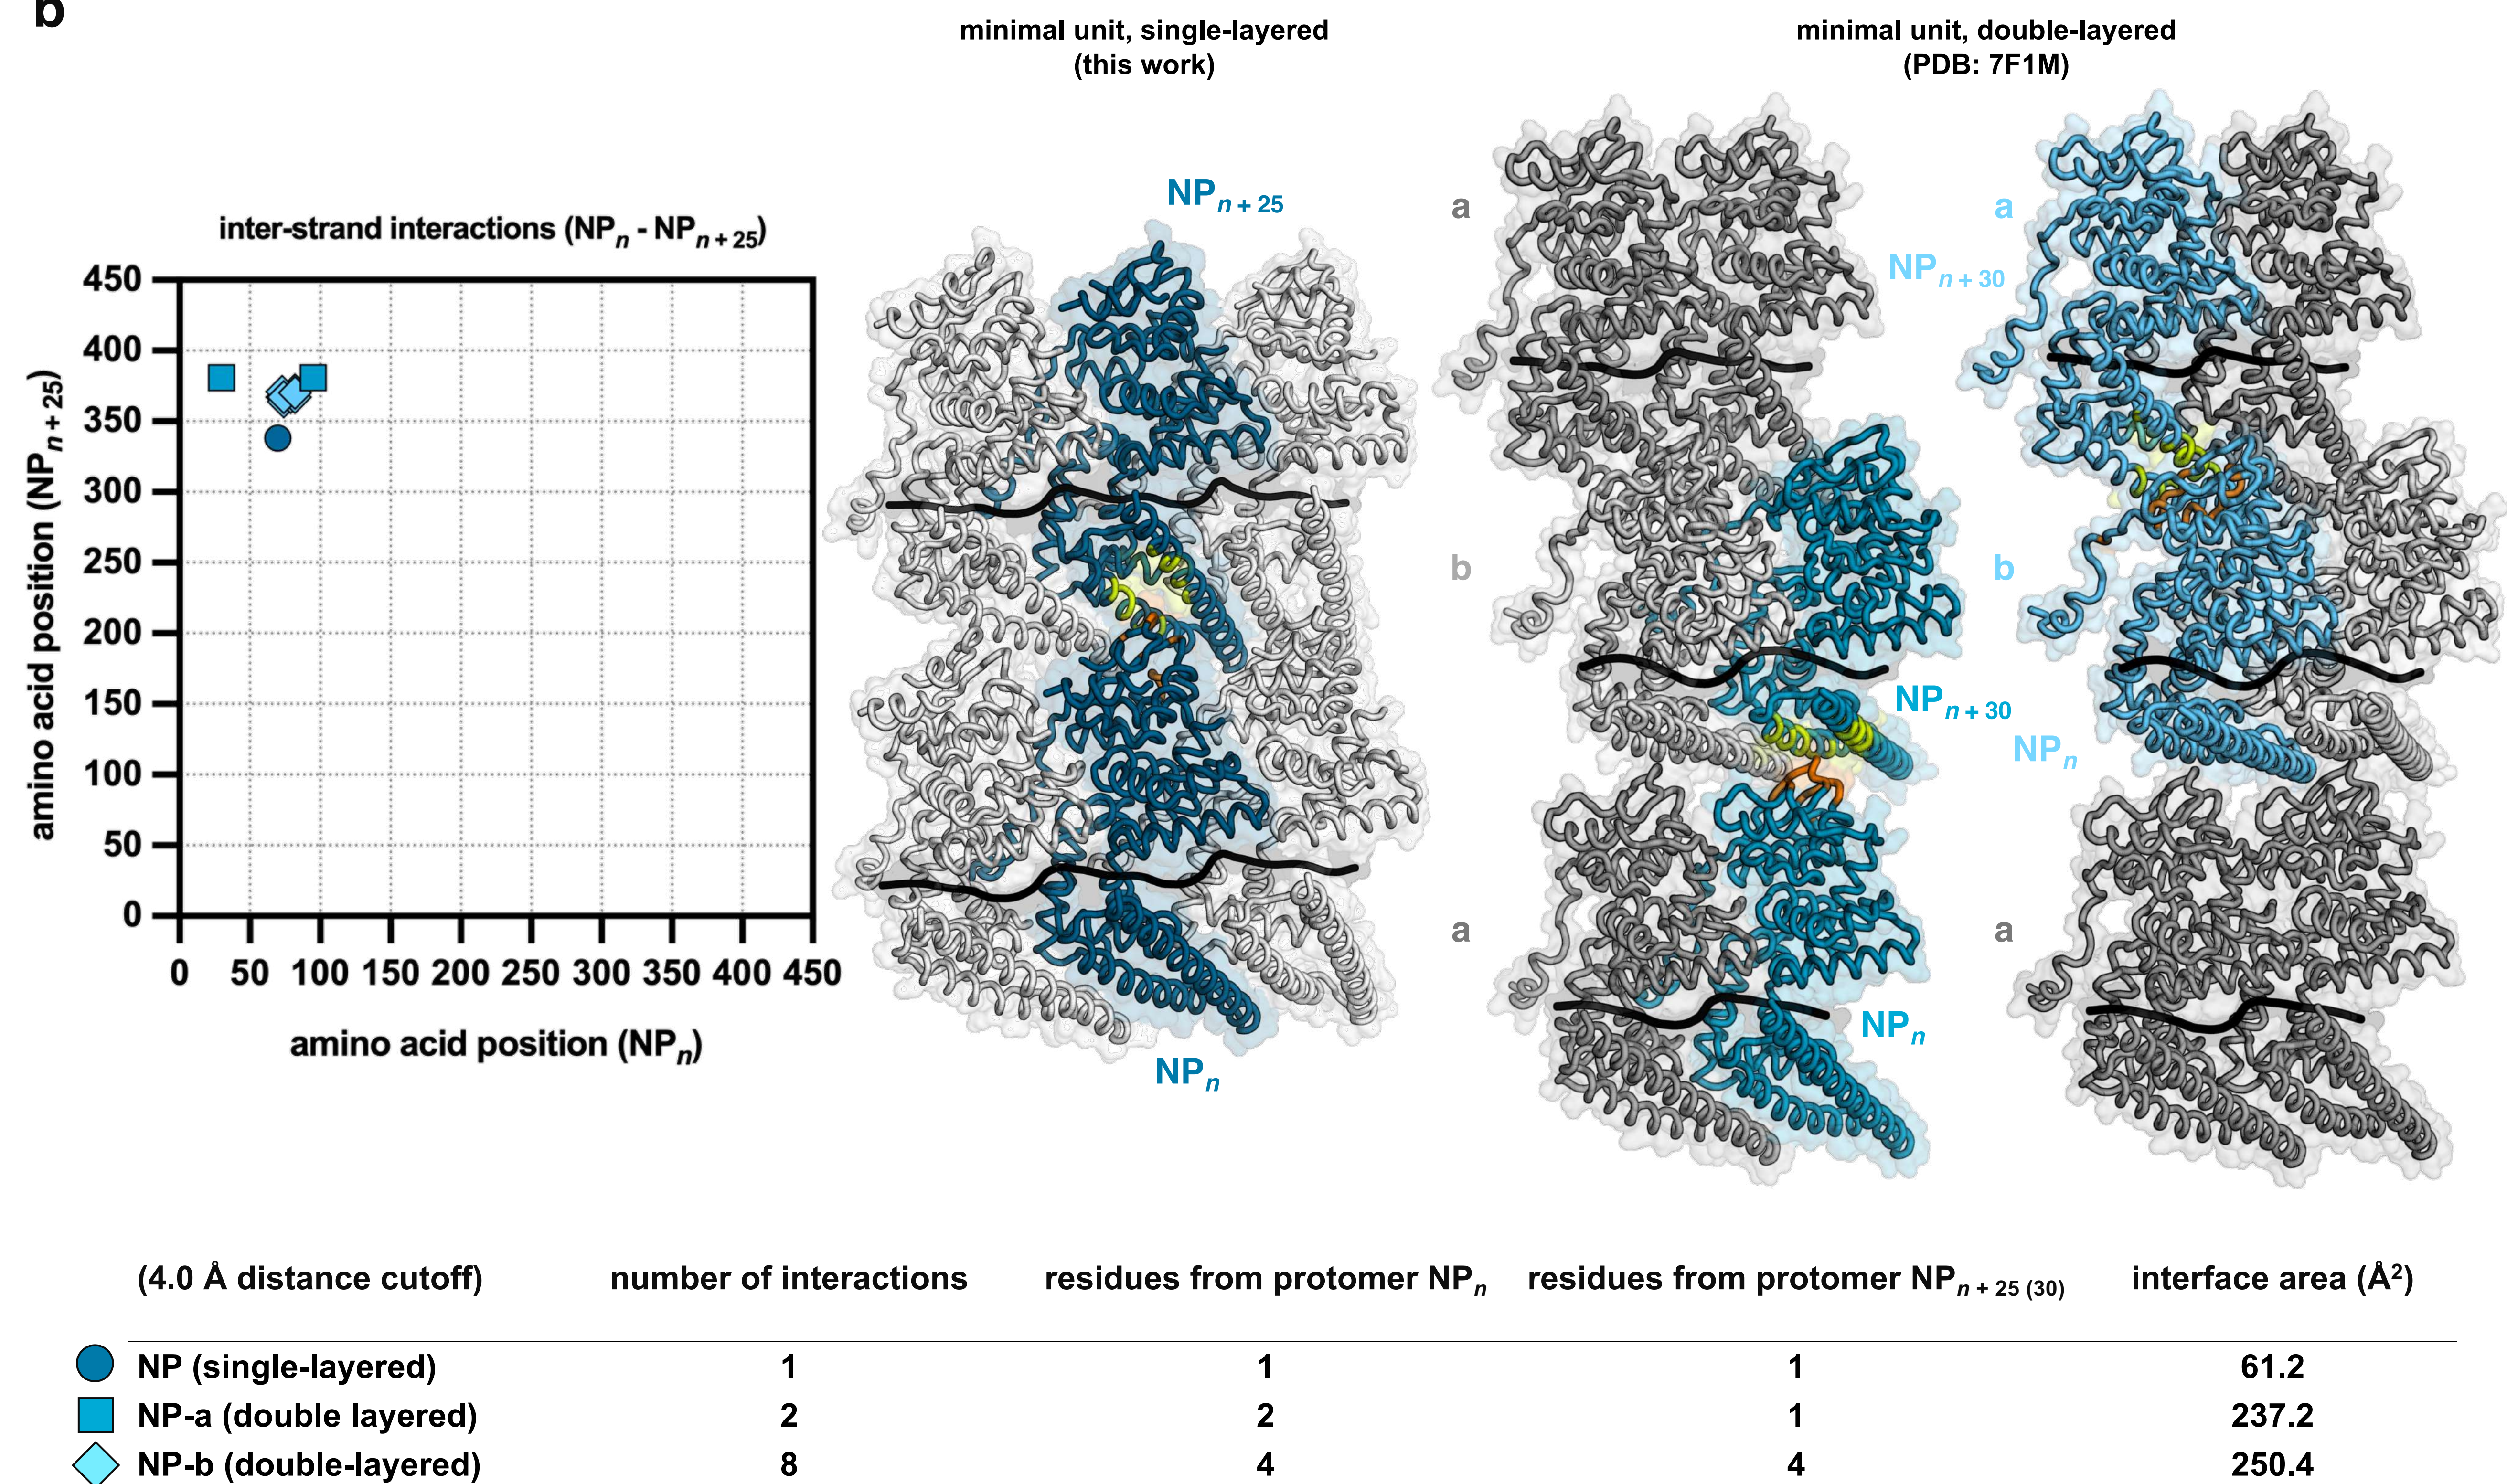

**Supplementary Fig. 11. Structural analysis of  $NP_{core} - NP_{core}$  interactions in the two conformations of the MARV RNP complex.** **a**, amino acid residue contacts map (left panel), ribbon/isosurface representation (right panel) and quantitative comparison (lower panel) of the intra-strand interactions between any given  $NP_n$  and its adjacent neighbor,  $NP_{n+1}$ . **b**, amino acid residue contacts map (left panel), ribbon/isosurface representation (right panel) and quantitative comparison (lower panel) of the inter-strand interactions between any given  $NP_n$  and the neighbor in the same position in the subsequent strand,  $NP_{n+25}$  (this work) or  $NP_{n+30}$  (PDB: 7F1M). For any arbitrary protomer NP in the single-, and NP-a and NP-b in the double-layer MARV RNP complex, respectively, the number of interactions, involved residues per protomer and extension of the interface area are indicated (circle, single-layered RNP NP; square, double-layered RNP NP-a; rhombus, double-layered RNP NP-b).



**a**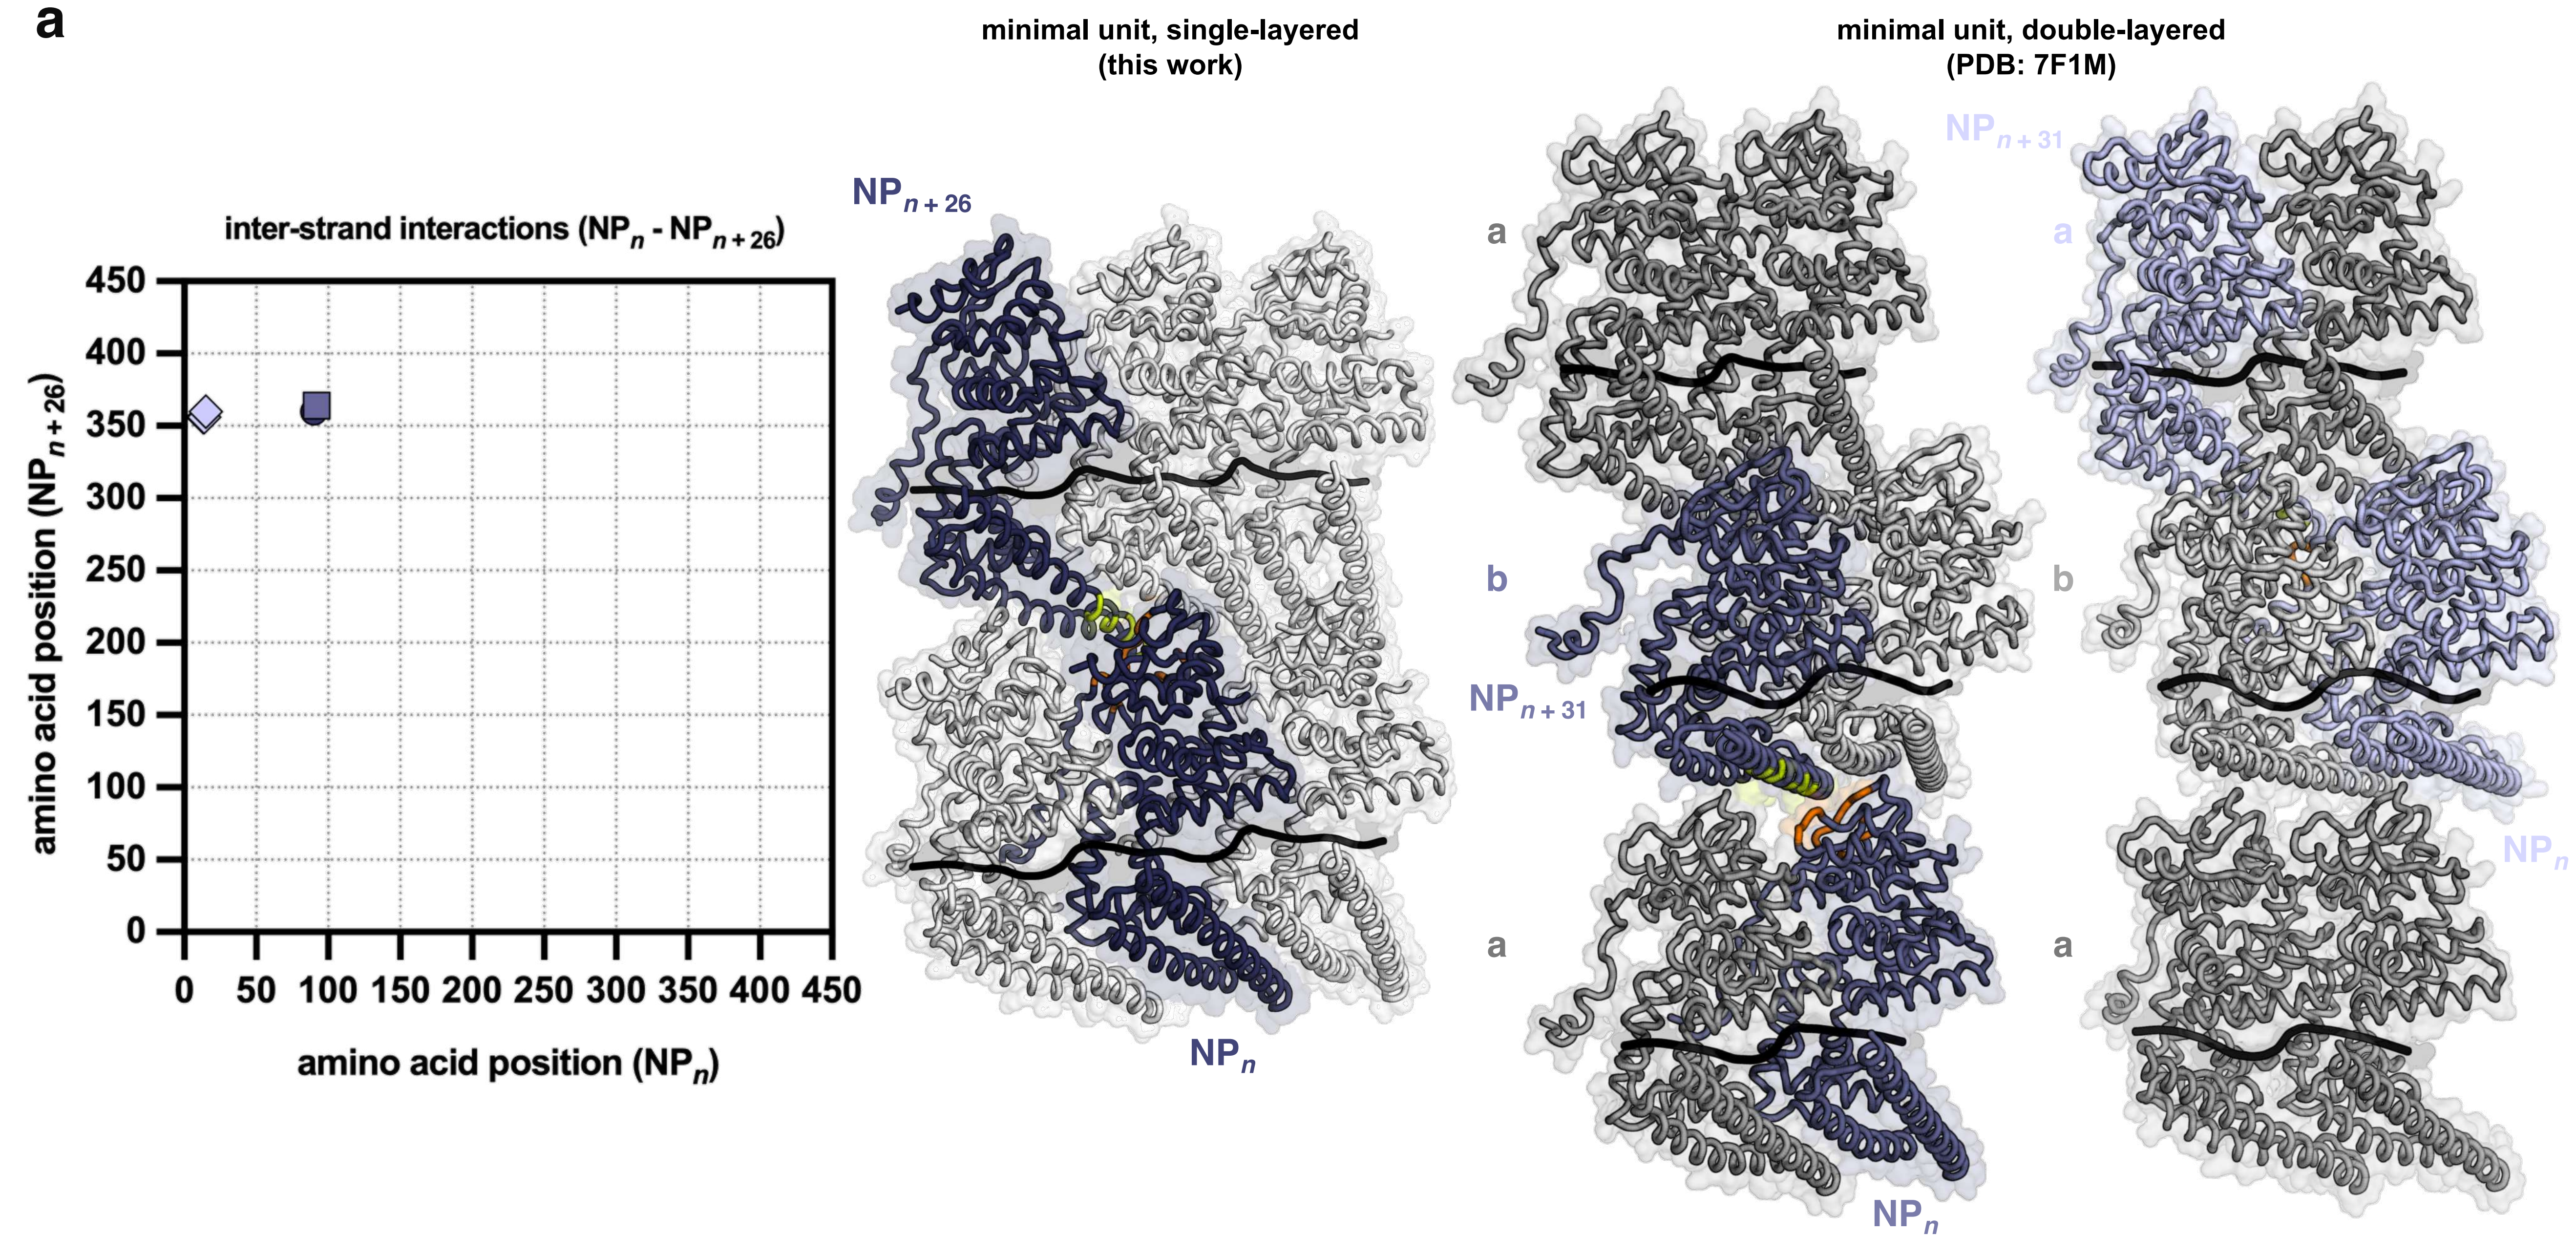**b**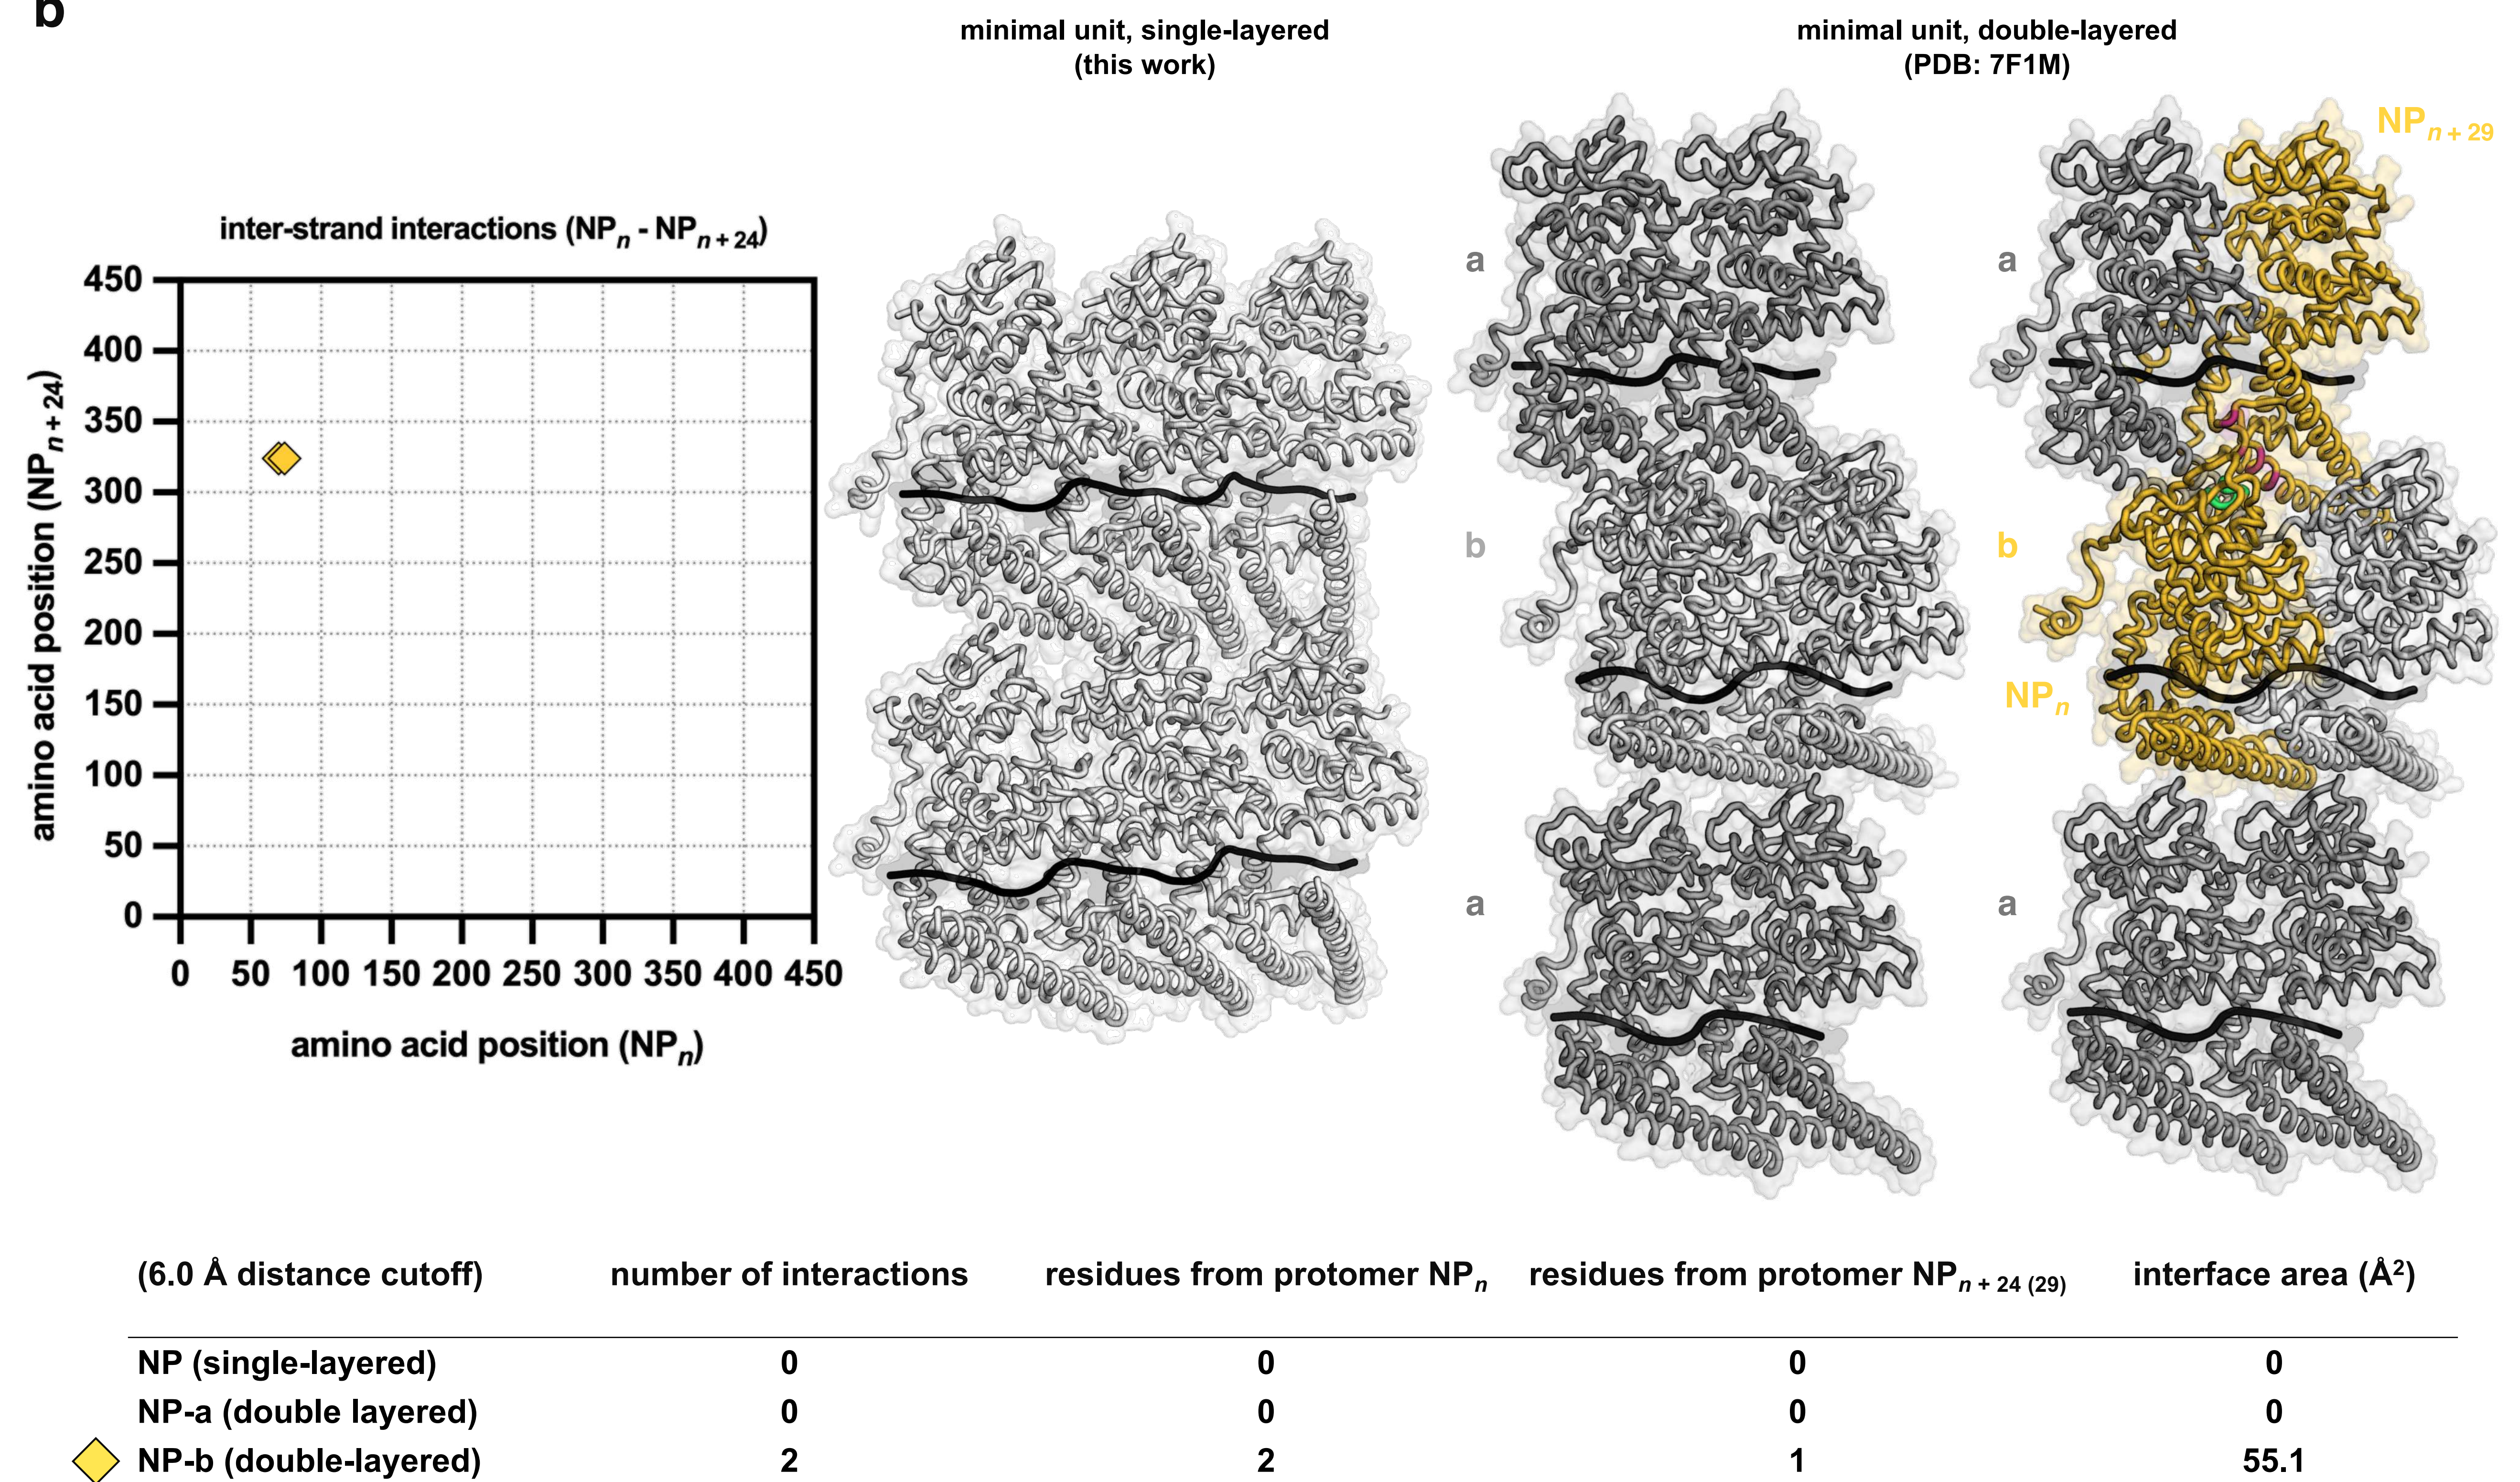

**Supplementary Fig. 12. Structural analysis of  $NP_{core} - NP_{core}$  interactions in the two conformations of the MARV RNP complex.** **a**, amino acid residue contacts map (left panel), ribbon/isosurface representation (right panel) and quantitative comparison (lower panel) of the inter-strand interactions between any given  $NP_n$  and the neighbor protomer in the subsequent position of the subsequent strand,  $NP_{n+26}$  (this work) or  $NP_{n+31}$  (PDB: 7F1M). **b**, amino acid residue contacts map (left panel), ribbon/isosurface representation (right panel) and quantitative comparison (lower panel) of the inter-strand interactions between any given  $NP_n$  and the neighbor protomer in the precedent position of the subsequent strand,  $NP_{n+24}$  (this work) or  $NP_{n+29}$  (PDB: 7F1M). For any arbitrary protomer NP in the single- and NP-a and NP-b in the double-layer MARV RNP complex, respectively, the number of interactions, involved residues per protomer and extension of the interface area are indicated (circle, single-layered RNP NP; square, double-layered RNP NP-a; rhombus, double-layered RNP NP-b).



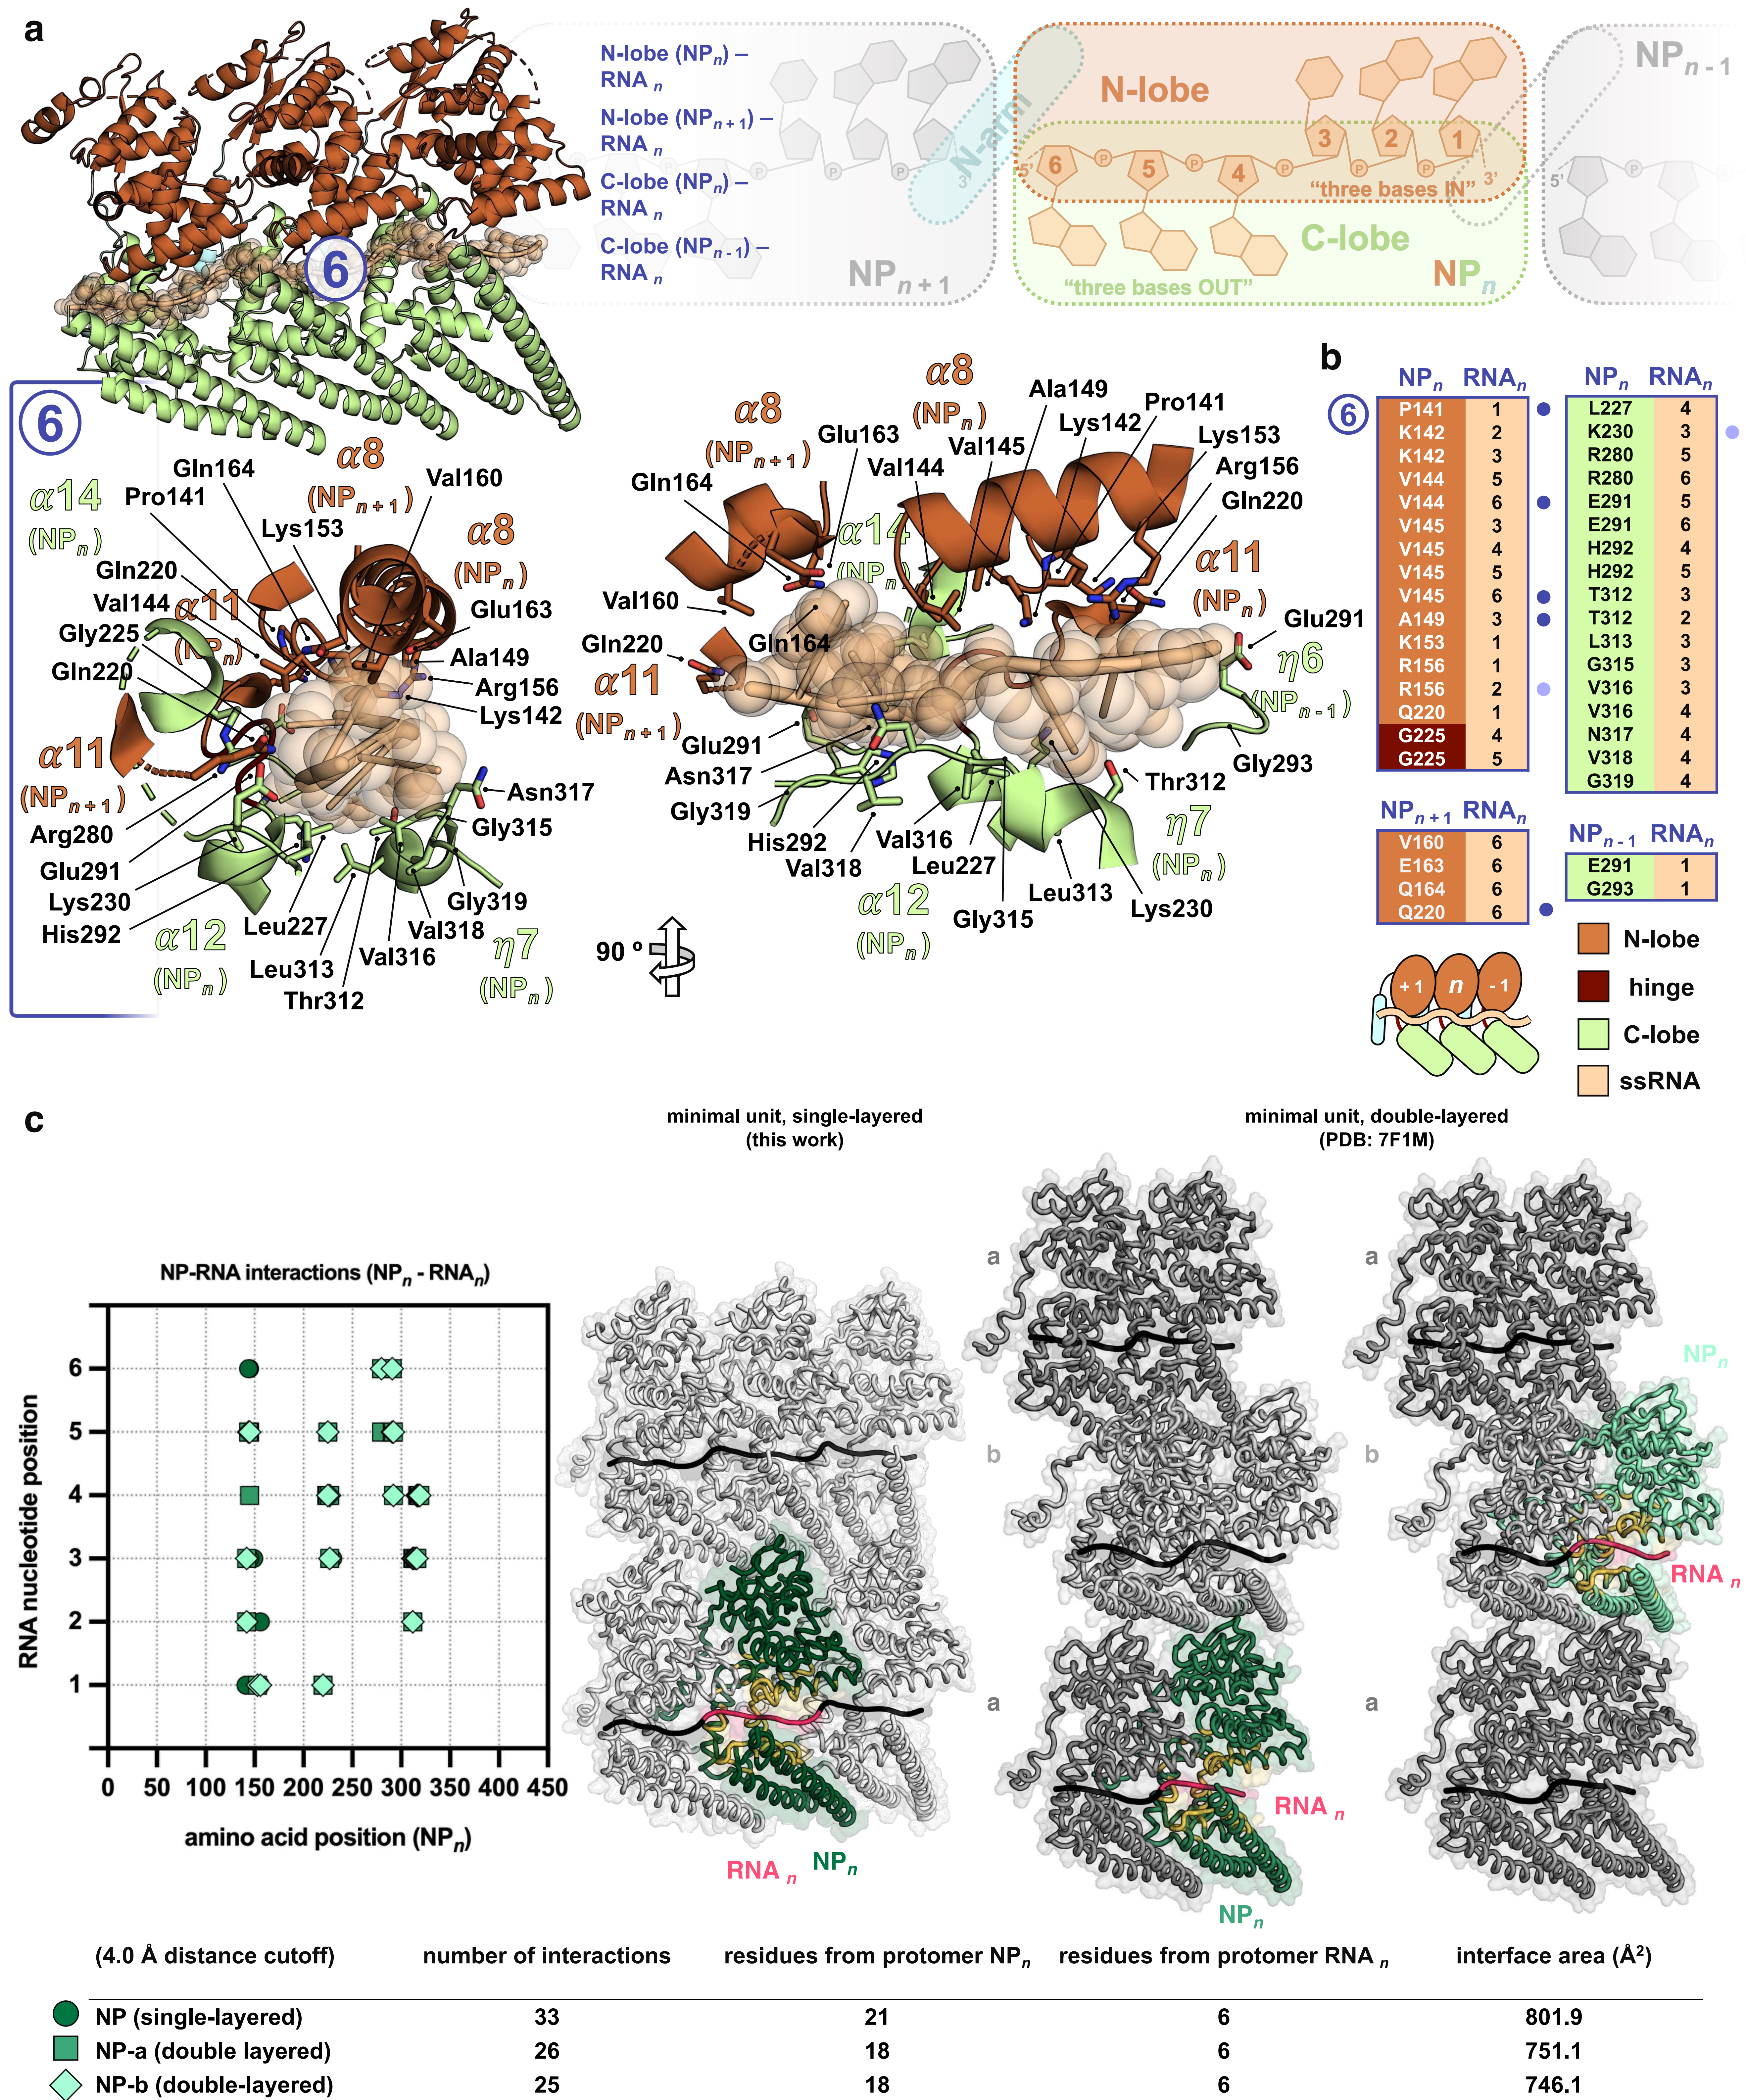

**Supplementary Fig. 13. Structural details of single-layered MARV RNP complex (RNA binding) and analysis of  $NP_{core}$  - RNA interactions in two conformations of the MARV RNP complex.** **a**, ribbon representation overview of a trimeric minimal unit (top left), cartoon of ssRNA “three bases-in, three bases-out” arrangement (top right) and close-up (insets) showing the interactions between any arbitrary RNA<sub>n</sub> and the N-lobe and C-lobe of  $NP_n$ ,  $NP_{n+1}$  and  $NP_{n-1}$  protomers (this work). **b**, summary of interacting residues (within 4 Å distance) of MARV  $NP_{core}$  with ssRNA; residue-nucleotide couples marked with a circle are unique (within 4 Å distance) of the MARV RNP complex in single-layer conformation (with R156 and K230 also present, at longer distance, in the double-layer one). **c**, amino acid and ribonucleotide residue contacts map (left panel), ribbon/isosurface representation (right panel) and quantitative comparison (lower panel) of the interactions between any given  $NP_n$  protomer and its bound RNA<sub>n</sub> of NP (this work), or NP-a and NP-b (PDB: 7F1M) protomers. For any arbitrary protomer NP in the single-, and NP-a and NP-b in the double-layer MARV RNP complex, respectively, the number of interactions, involved residues per protomer and extension of the interface area are indicated (circle, single-layered RNP NP; square, double-layered RNP NP-a; rhombus, double-layered RNP NP-b).



**a**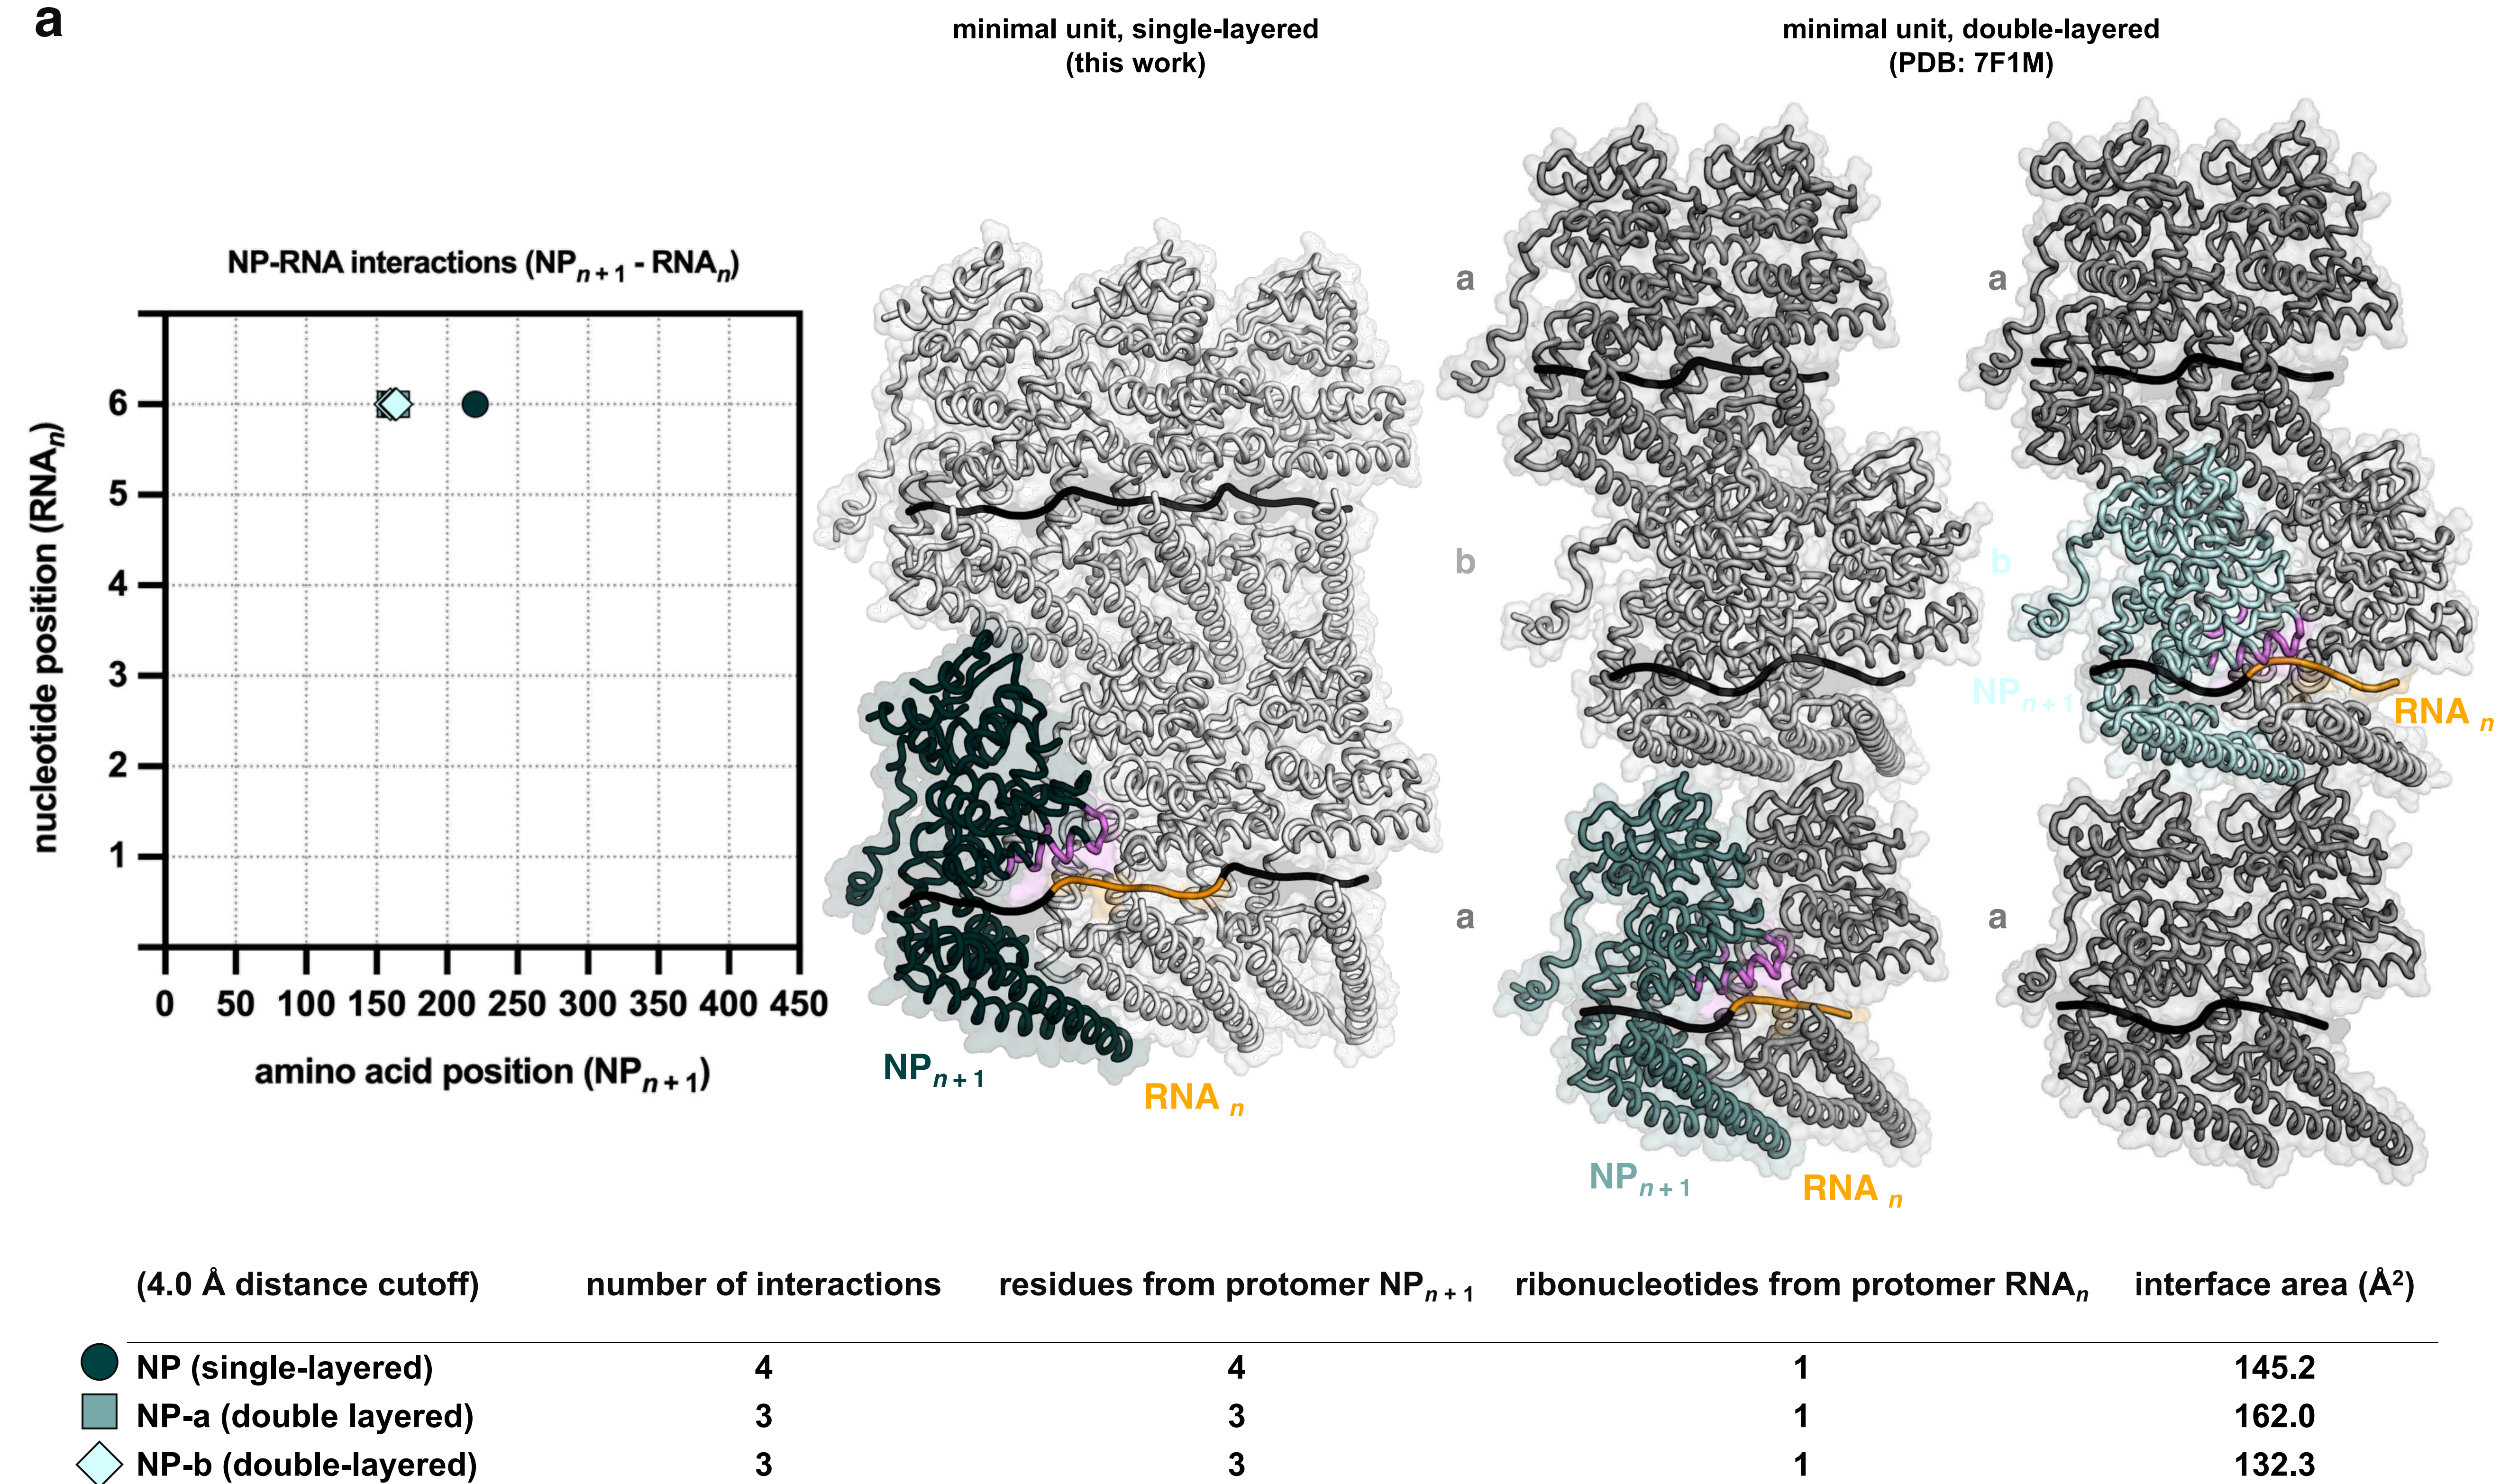**b**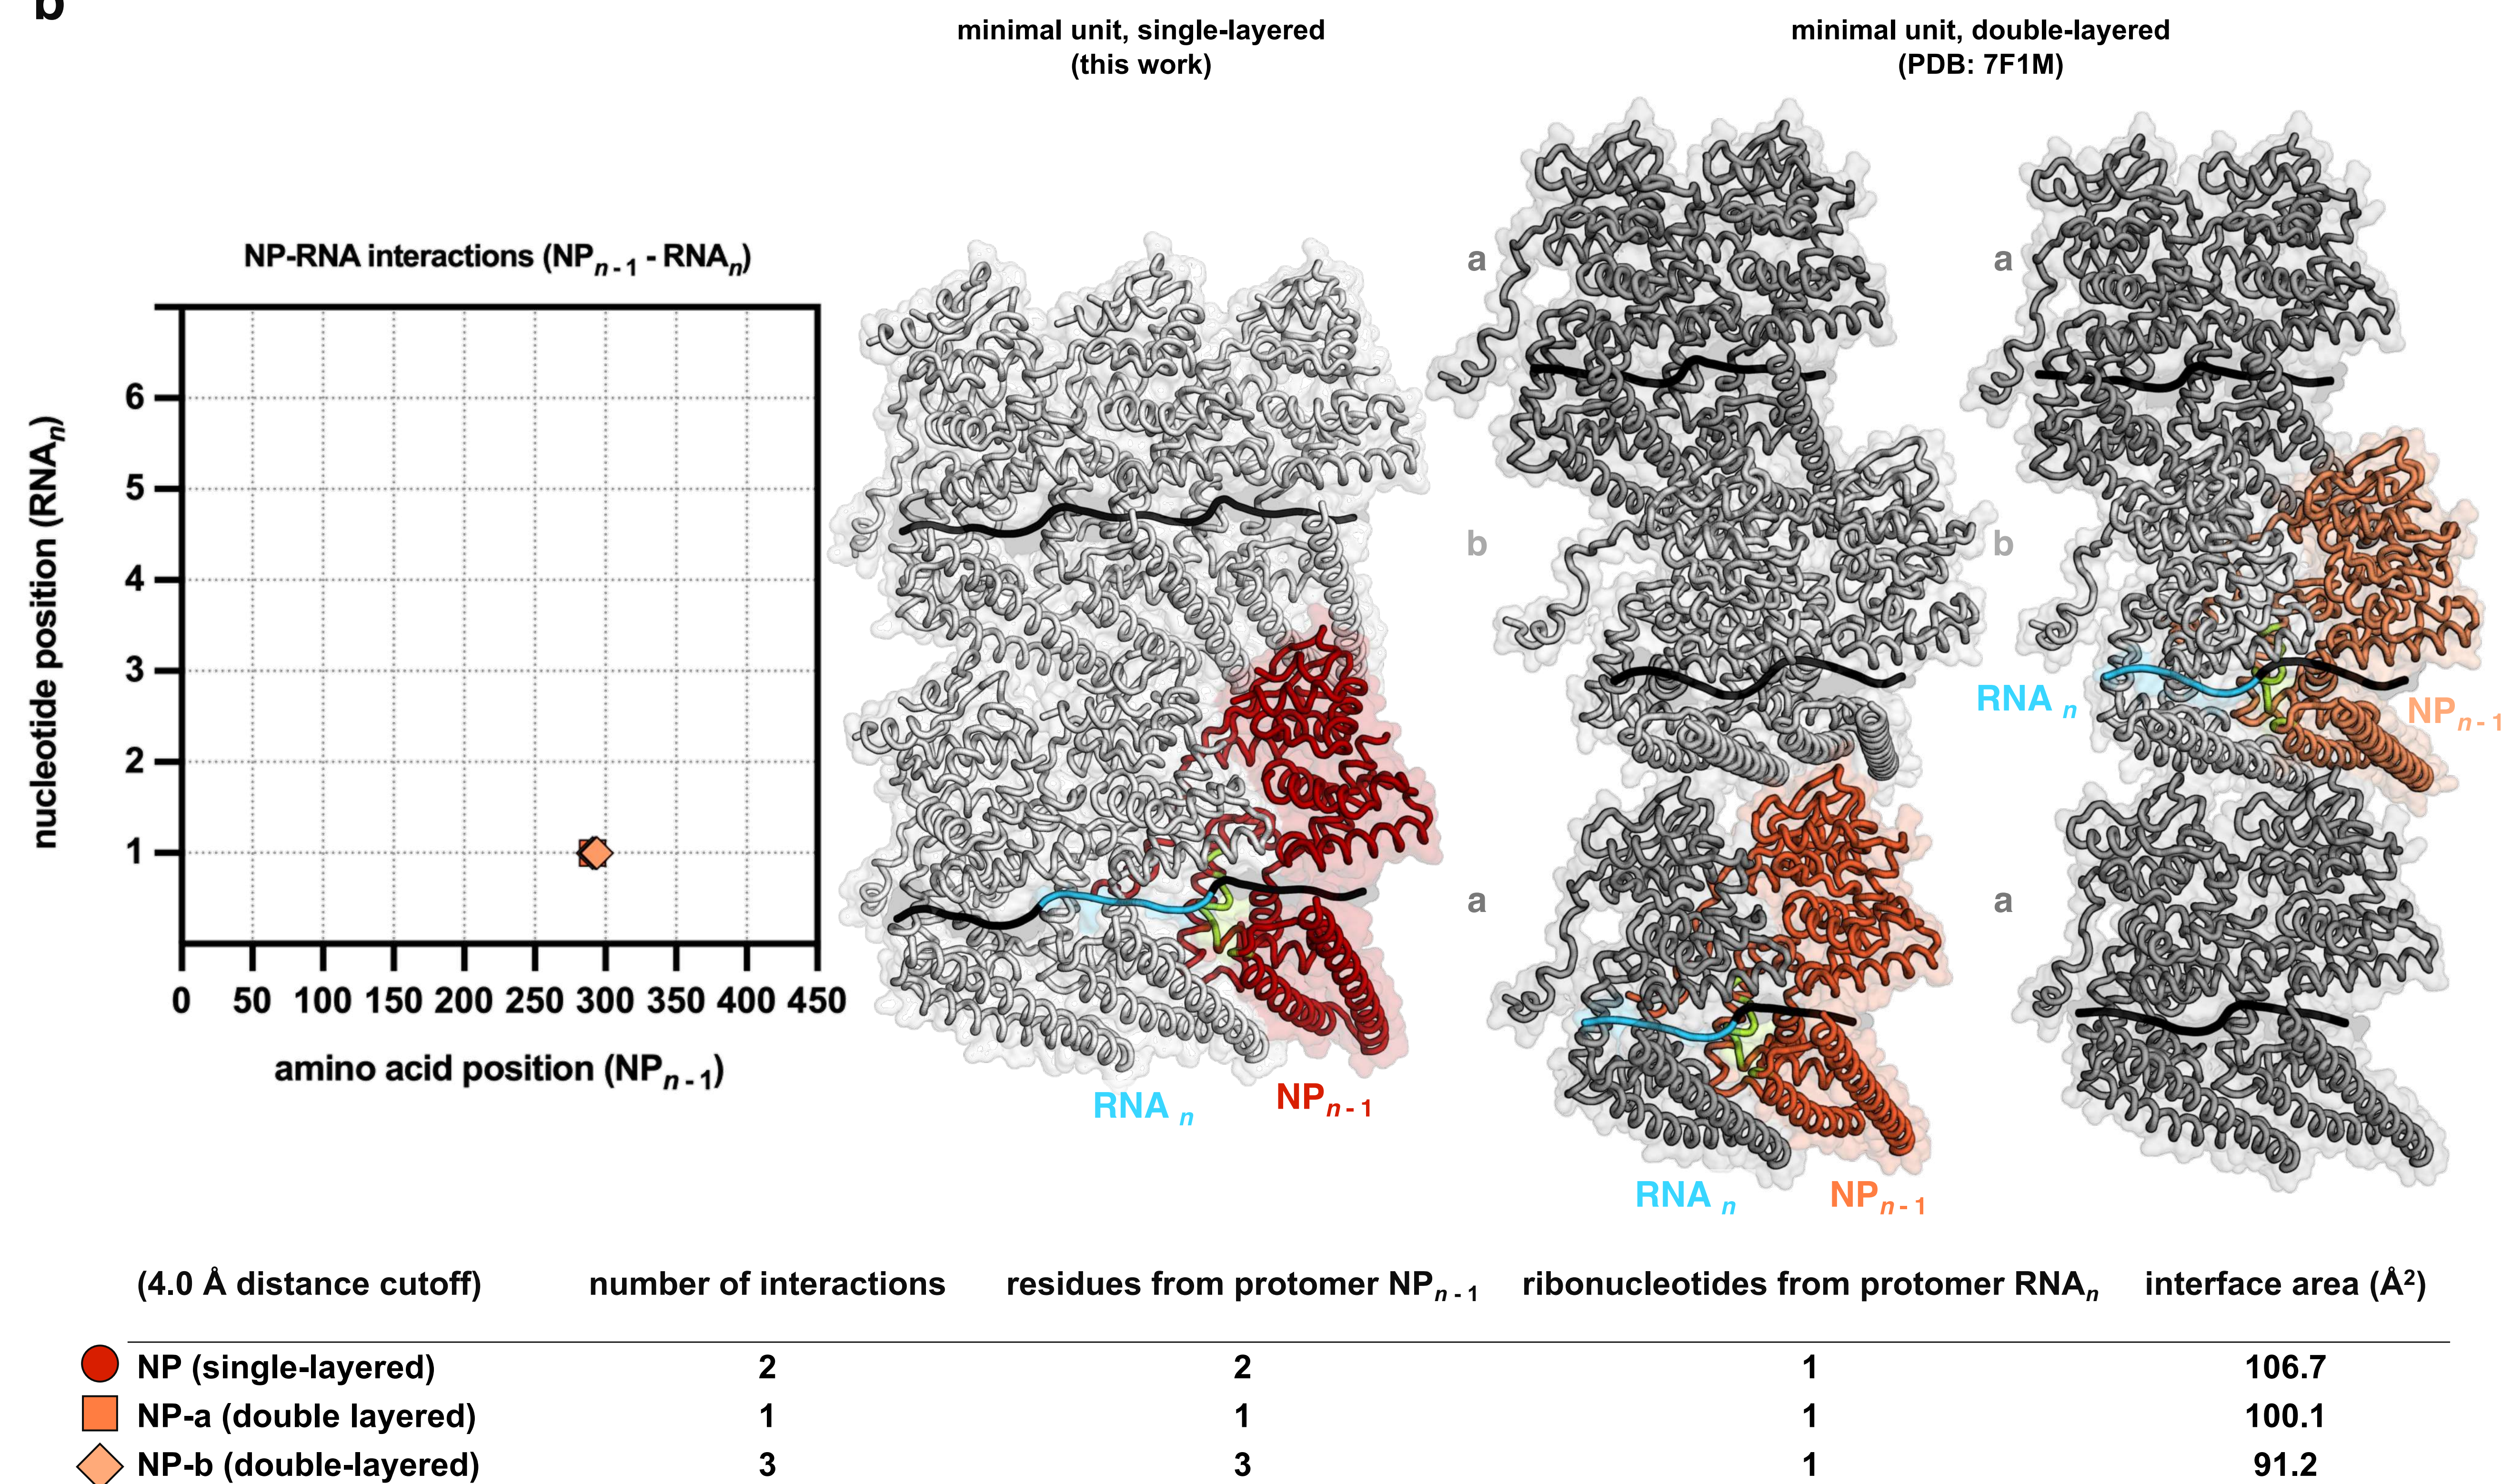

**Supplementary Fig. 14. Structural analysis of  $NP_{core}$  - RNA interactions in the two conformations of the MARV RNP complex.** **a**, amino acid and ribonucleotide residue contacts map (left panel), ribbon/isosurface representation (right panel) and quantitative comparison (lower panel) of the interactions between any given  $RNA_n$  and its adjacent neighbor  $NP_{n+1}$  protomer. **b**, amino acid and ribonucleotide residue contacts map (left panel), ribbon/isosurface representation (right panel) and quantitative comparison (lower panel) of the interactions between any given  $RNA_n$  and its adjacent neighbor  $NP_{n-1}$  protomer. For any arbitrary protomer NP (this work) in the single-, and NP-a and NP-b (PDB: 7F1M) in the double-layer MARV RNP complex, respectively, the number of interactions, involved residues per protomer and extension of the interface area are indicated (circle, single-layered RNP NP; square, double-layered RNP NP-a; rhombus, double-layered RNP NP-b).



**a****EBOV****(PDB: 5Z9W)**

single-layered  
 $p \approx 73.5 \text{ \AA}$   
 n. subunits/turn  $\approx 24.4$   
 inner  $\varnothing \approx 175 \text{ \AA}$   
 outer  $\varnothing \approx 295 \text{ \AA}$

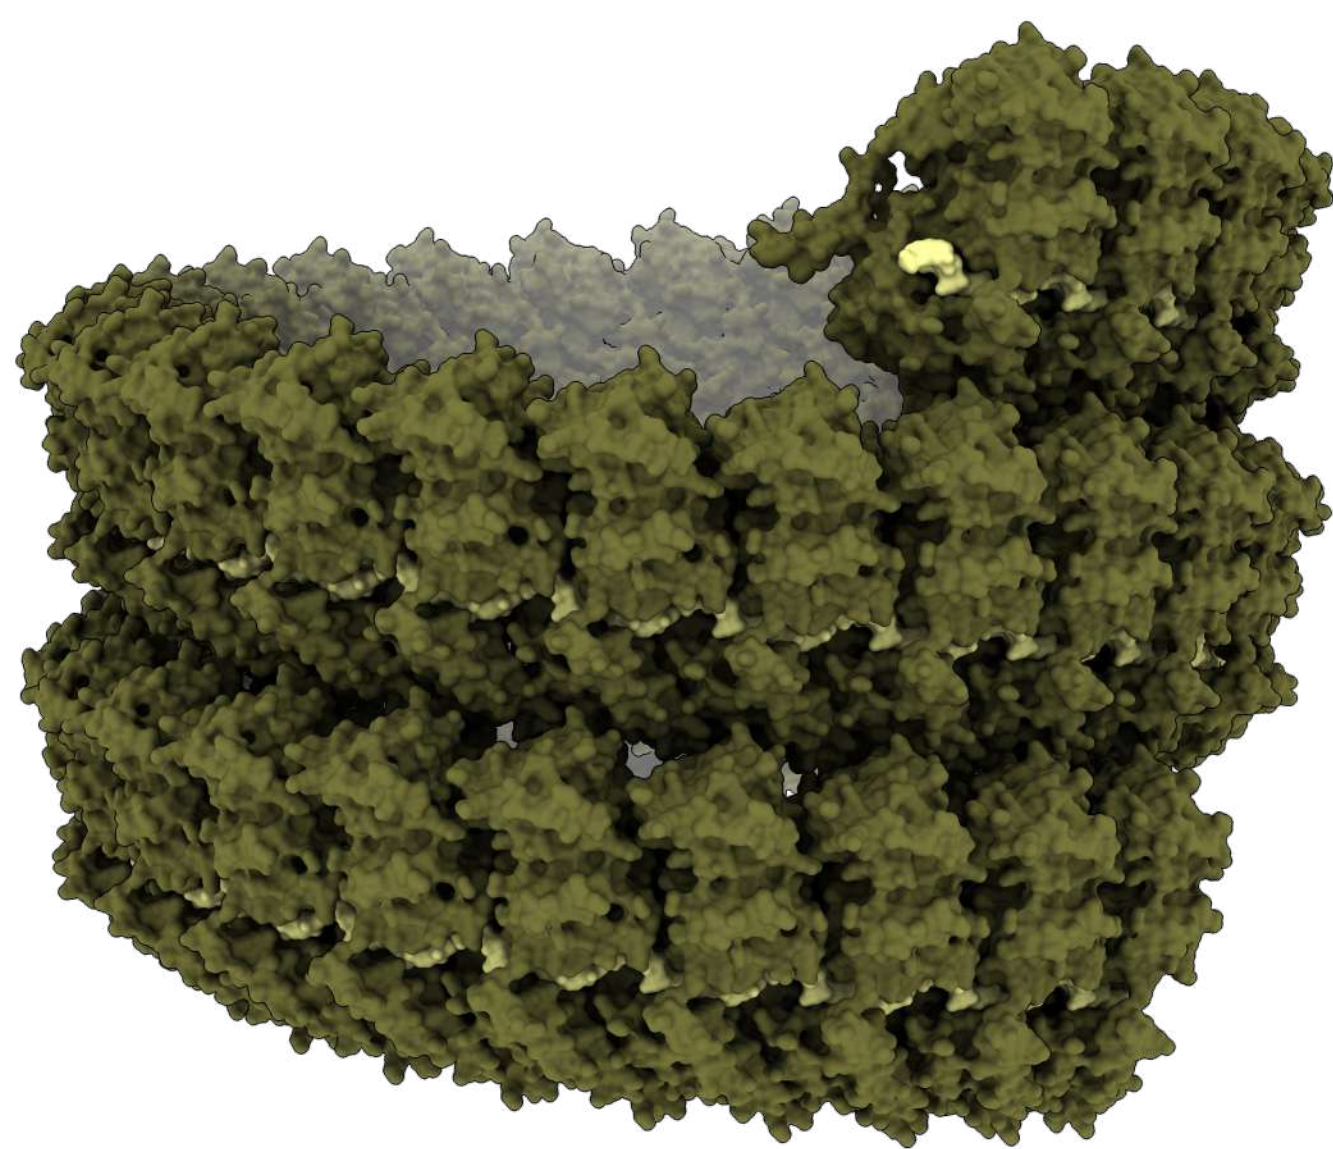**EBOV****(PDB: 6NUT)**

single-layered  
 $p \approx 69.5 \text{ \AA}$   
 n. subunits/turn  $\approx 24.5$   
 inner  $\varnothing$  N.R. ( $\approx 175 \text{ \AA}$ )  
 outer  $\varnothing$  N.R. ( $\approx 295 \text{ \AA}$ )

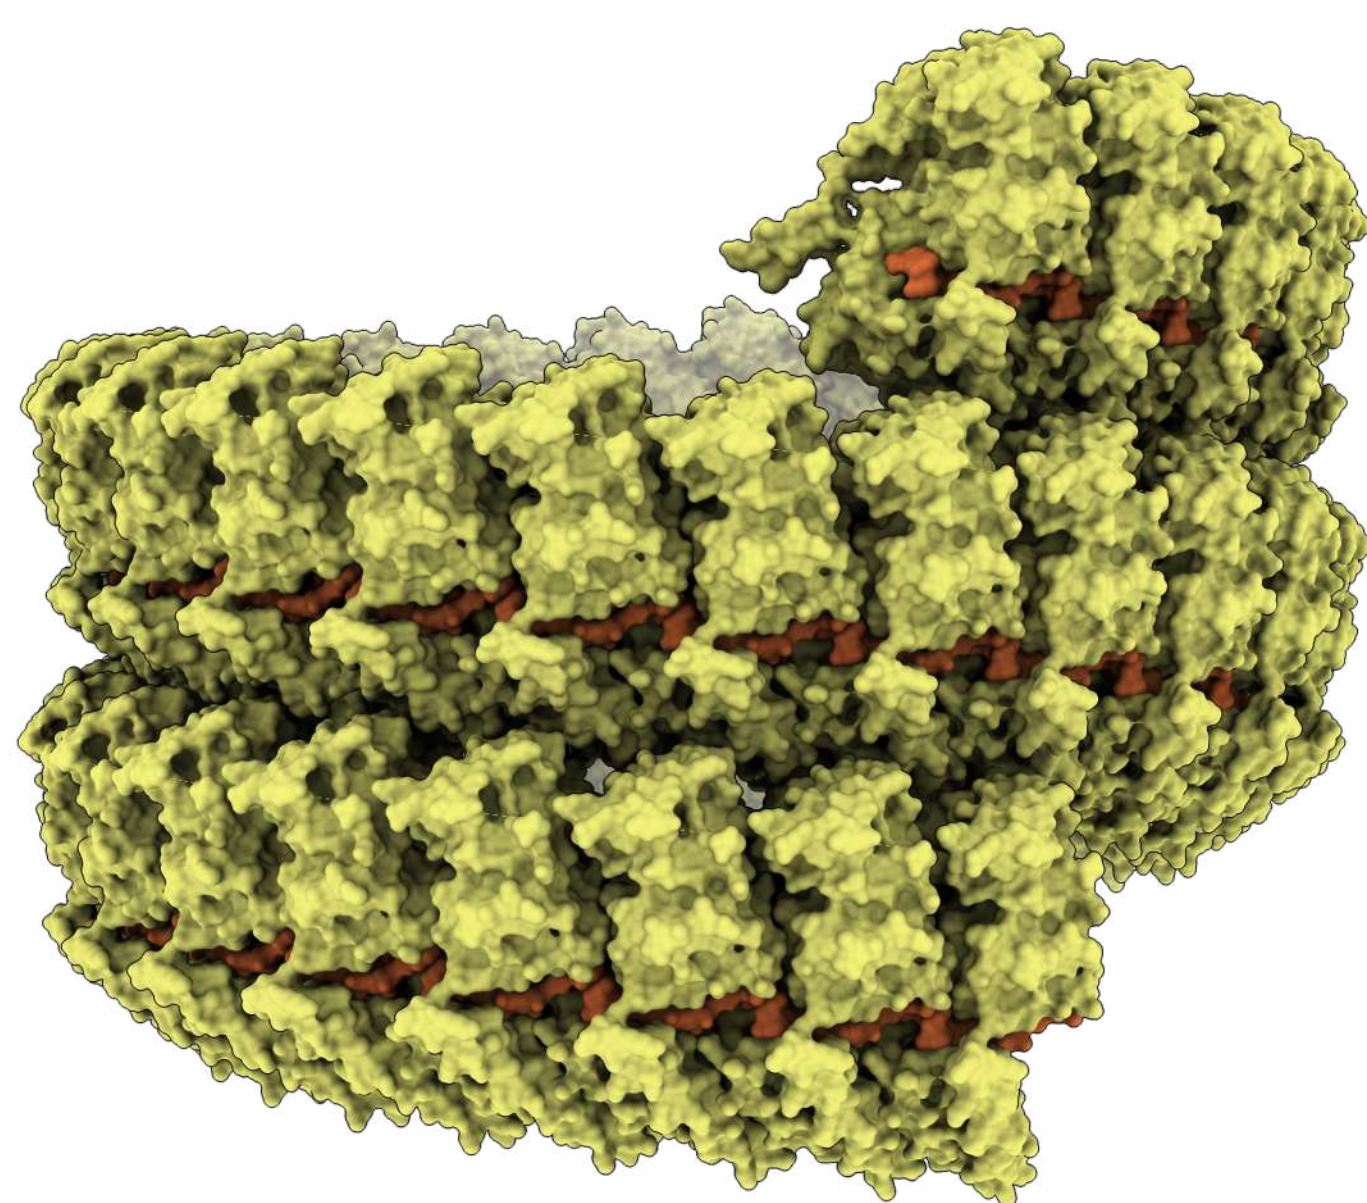**EBOV****(PDB: 6C54)**

double-layered  
 $p \approx 112.0 \text{ \AA}$   
 n. subunits/turn  $\approx 42.2$   
 inner  $\varnothing \approx 330 \text{ \AA}$   
 outer  $\varnothing \approx 490 \text{ \AA}$

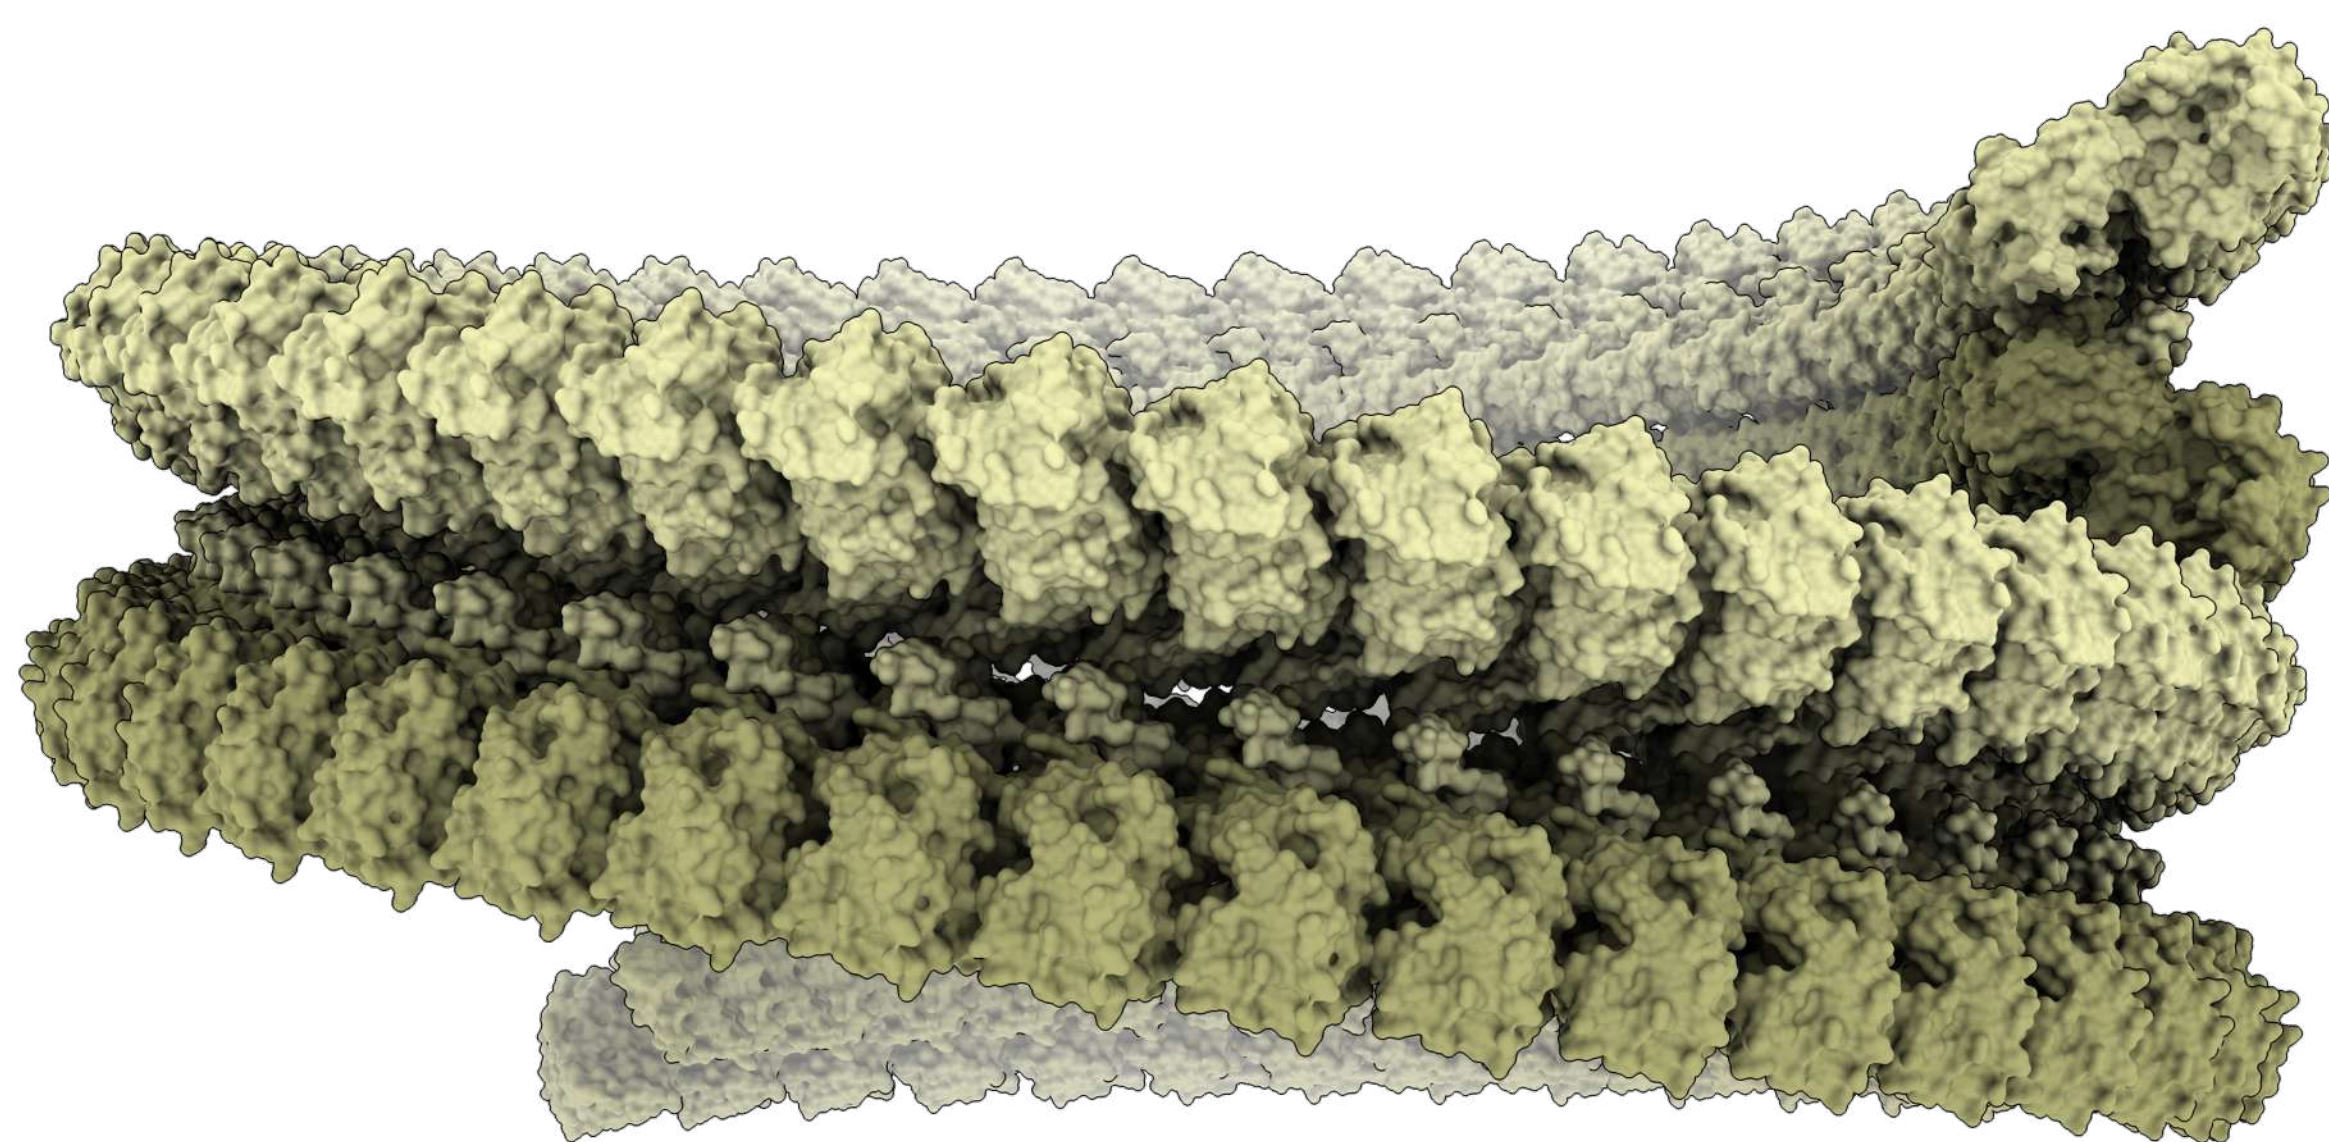**b**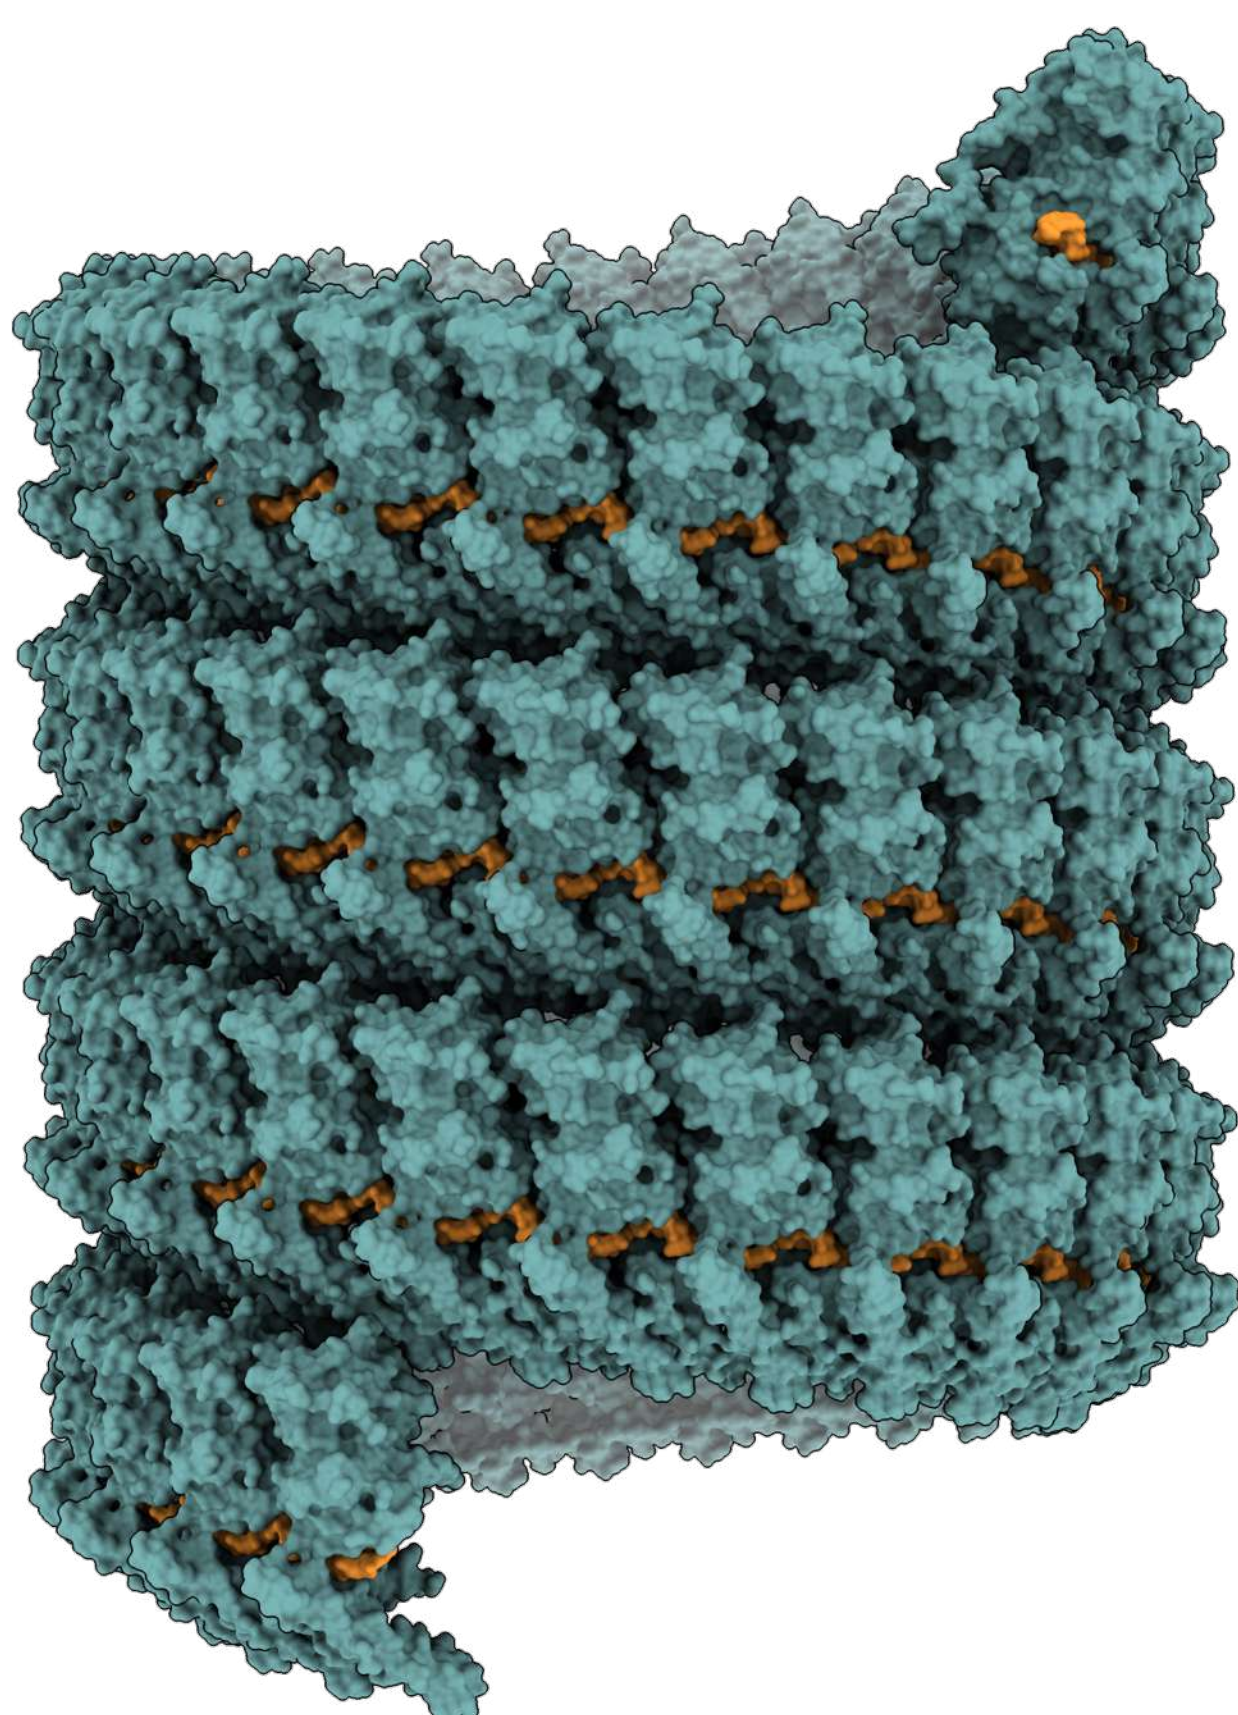**LLOV****(PDB: 7YPW)**

single-layered  
 $p \approx 76.0 \text{ \AA}$   
 n. subunits/turn  $\approx 23.8$   
 inner  $\varnothing \approx 195 \text{ \AA}$   
 outer  $\varnothing \approx 260 \text{ \AA}$

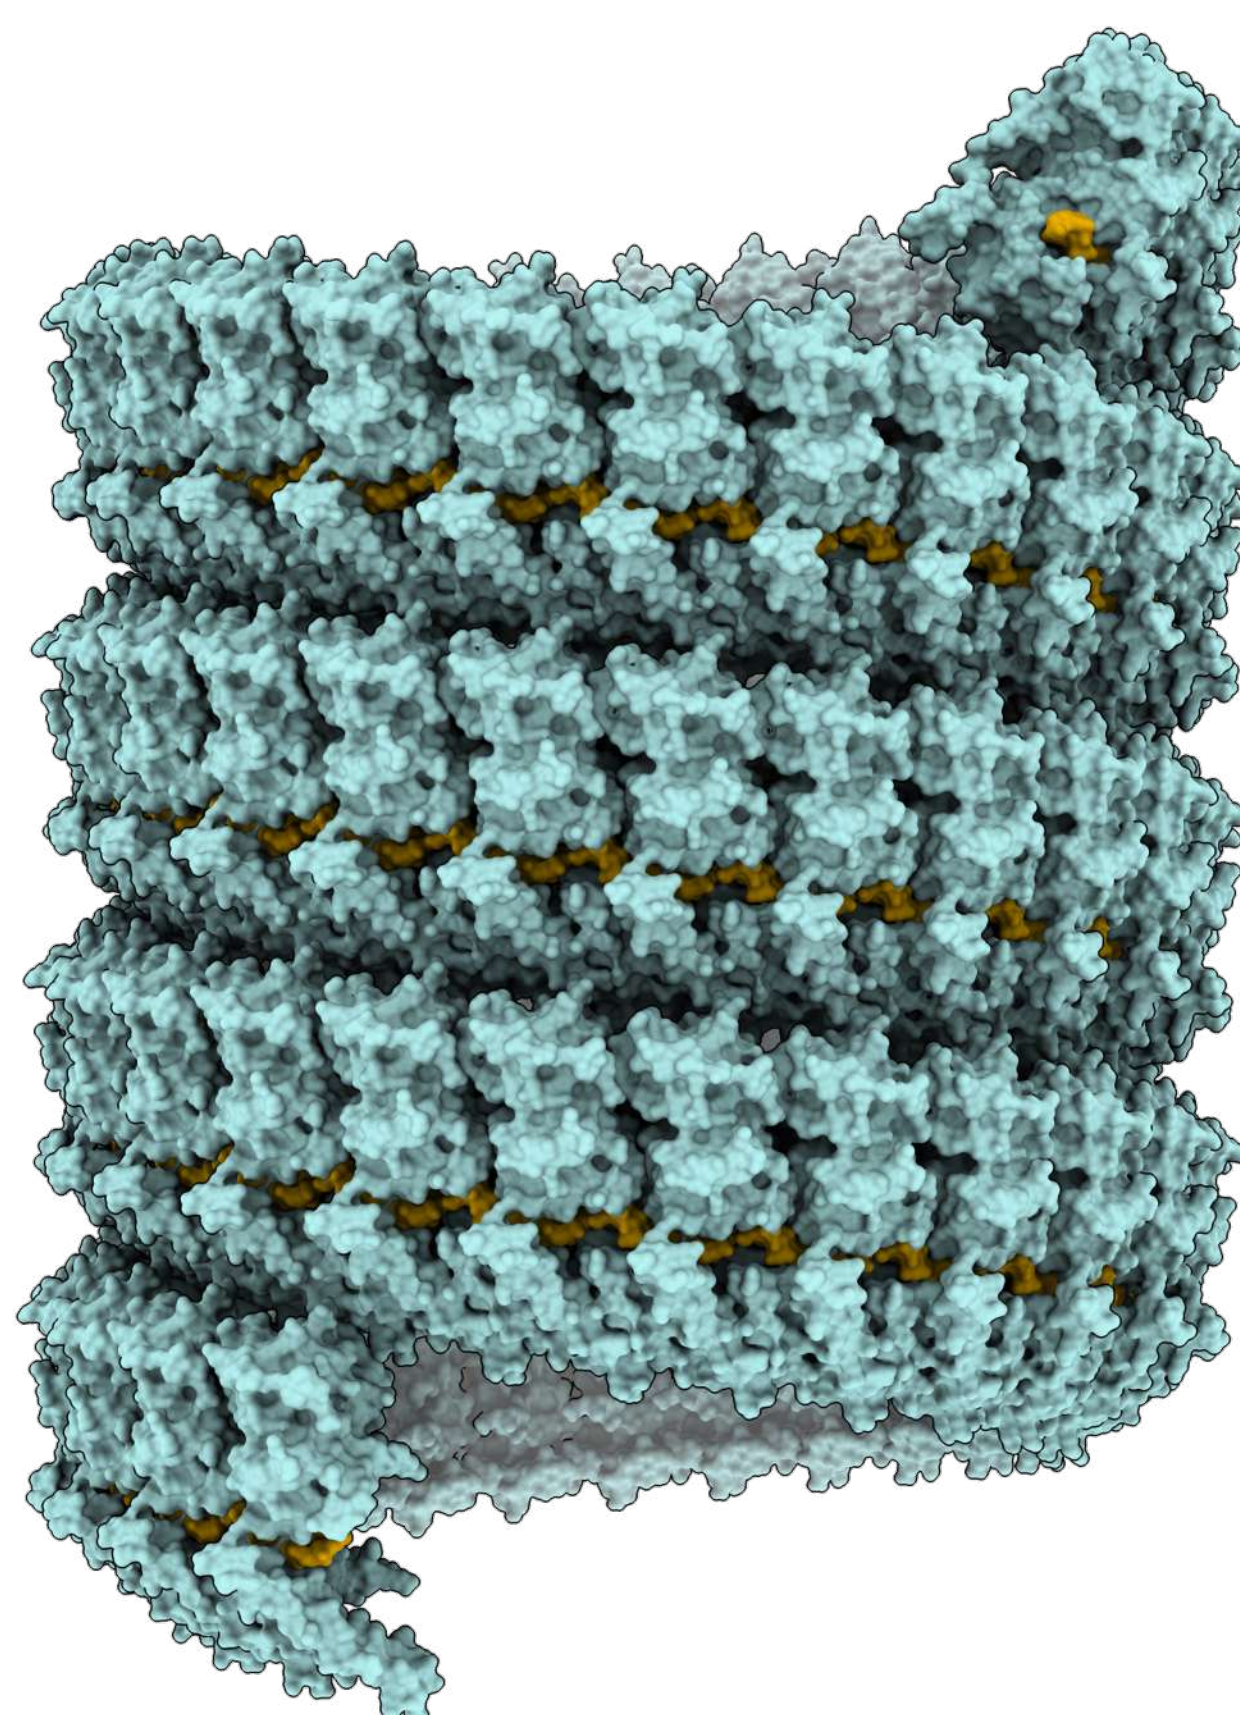**LLOV****(PDB: 7YR8)**

single-layered  
 $p \approx 75.3 \text{ \AA}$   
 n. subunits/turn  $\approx 23.8$   
 inner  $\varnothing \approx 195 \text{ \AA}$   
 outer  $\varnothing \approx 260 \text{ \AA}$

**c**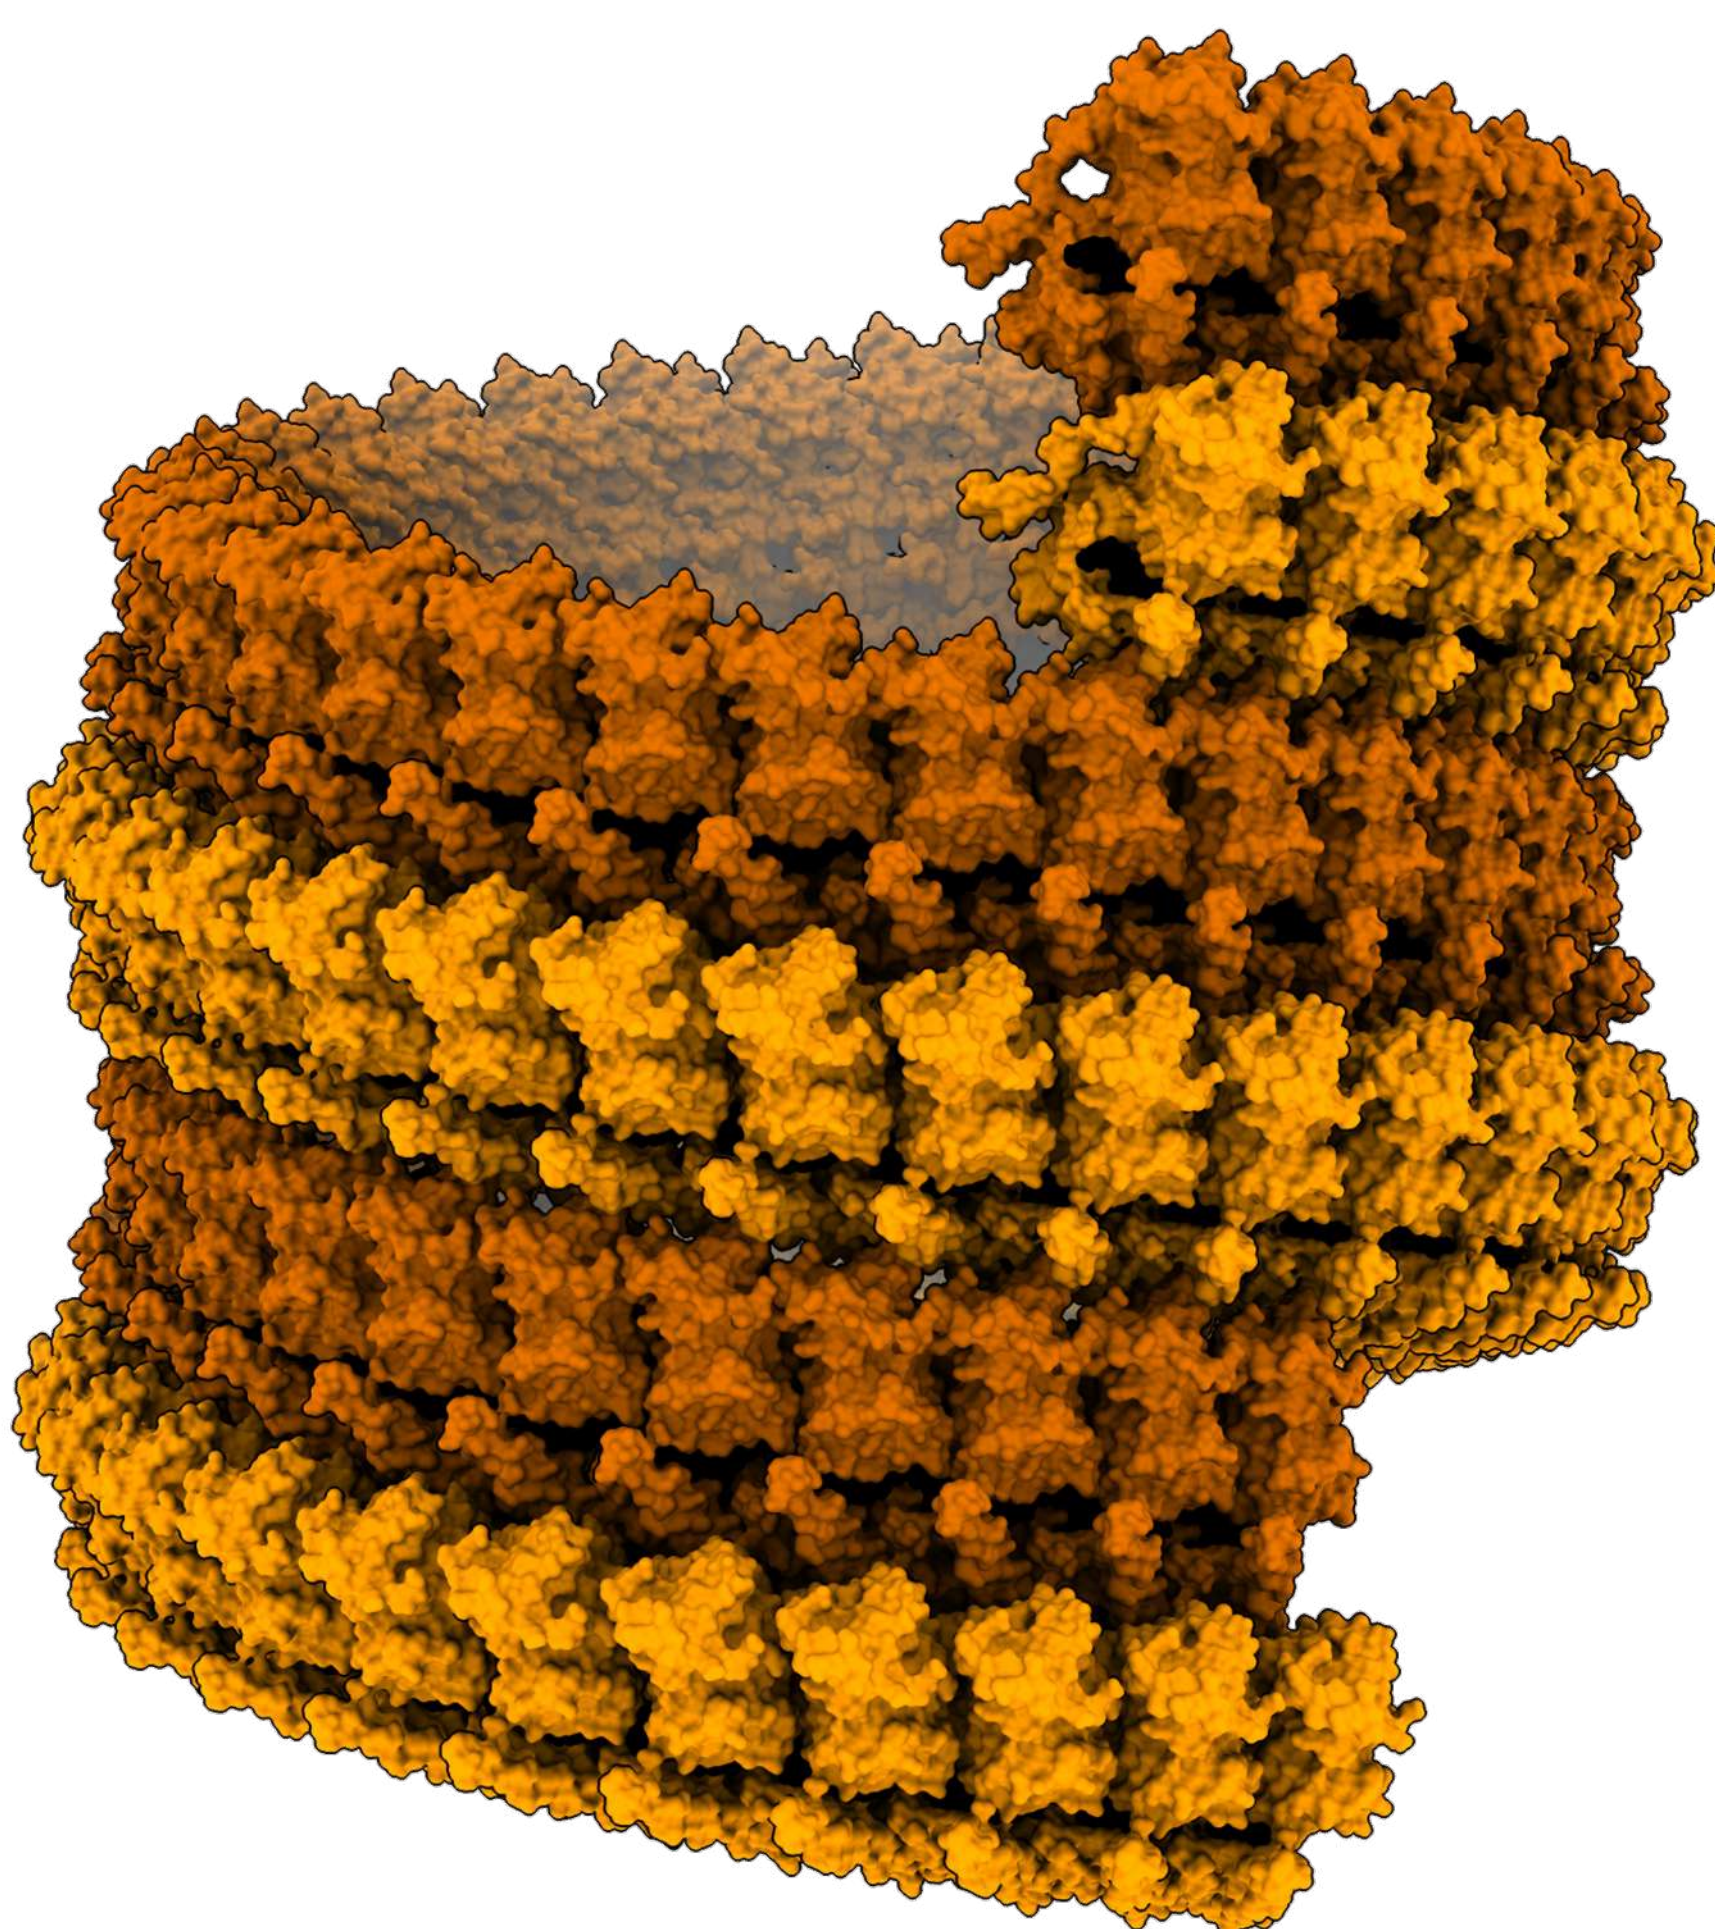**MARV****(PDB: 7F1M)**

double-layered  
 $p \approx 128.9 \text{ \AA}$   
 n. subunits/turn  $\approx 30.5$   
 inner  $\varnothing \approx 255 \text{ \AA}$   
 outer  $\varnothing \approx 330 \text{ \AA}$

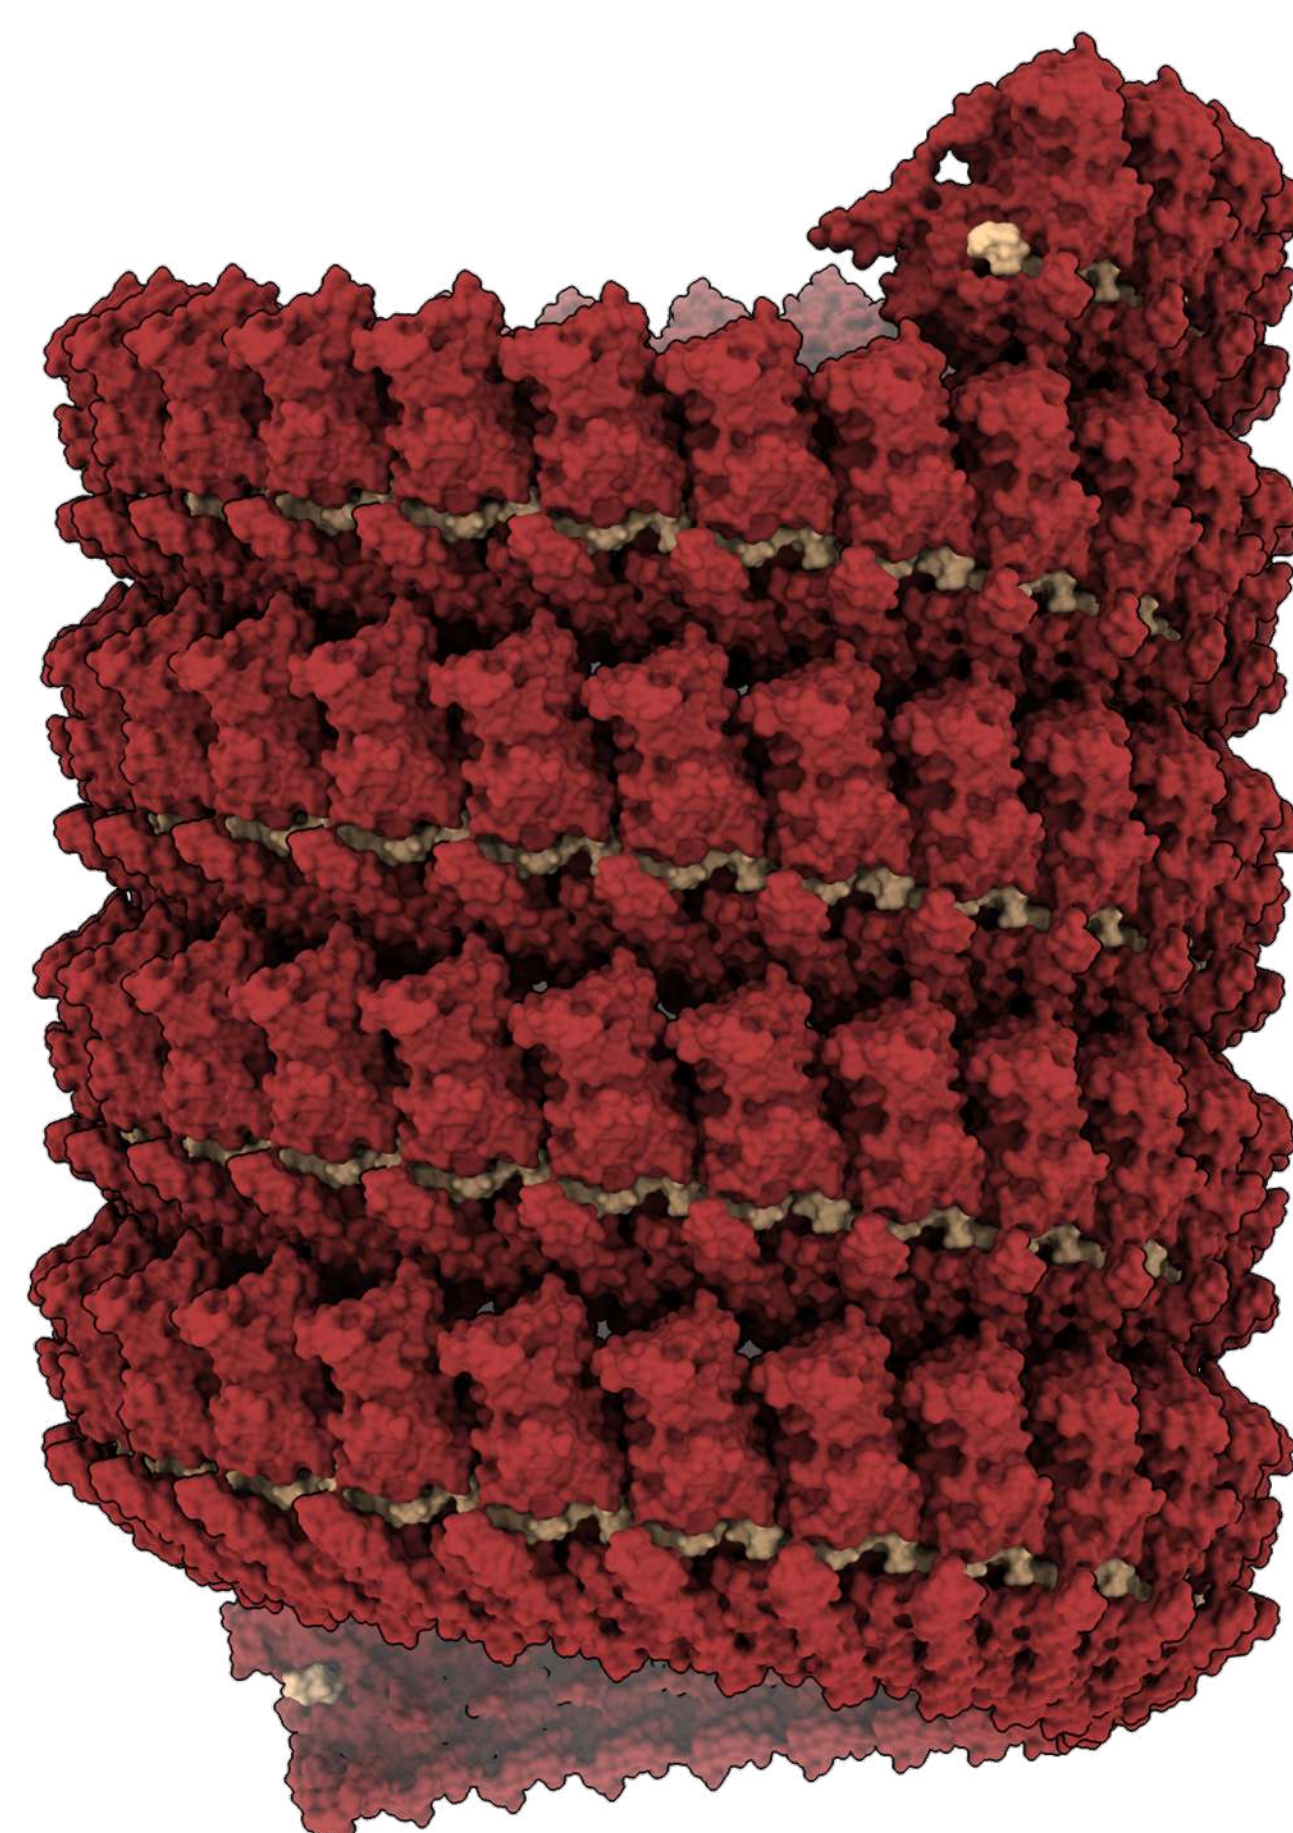**MARV****(this work)**

single-layered  
 $p \approx 70.1 \text{ \AA}$   
 n. subunits/turn  $\approx 24.4$   
 inner  $\varnothing \approx 164 \text{ \AA}$   
 outer  $\varnothing \approx 285 \text{ \AA}$

**Supplementary Fig. 15. Comparison between single- and double-layered RNP complexes among filoviruses.** Atomic models of cryo-EM RNP complexes from the *Filoviridae* family, including members of: **a**, the *Orthoebolavirus* genus, i.e., EBOV in single- (left, PDB: 5Z9W; middle, PDB: 6NUT) and double-layer (right, PDB: 6C54) conformation; **b**, the *Cuevavirus* genus, i.e., LLOV in single-layer conformation of full-length NP (left, PDB: 7YPW) and NP<sub>core</sub> (right, PDB: 7YR8); **c**, the *Orthomareburgvirus* genus, i.e., MARV in double- (left, PDB: 7F1M) single-layer (this work, right) and conformation, all displayed as isosurface representations in side view orientation. For each atomic model the major helical parameters are indicated ( $p$ , pitch;  $\varnothing$ , diameter; N.R., not reported).
